# Supplementary material
Source: publisher site journal article supplement (https://www.dovepress.com/article/534335)
Supplement: Supplementary file 1 [file 534335%20Supplementary%20Tables%20S1-S4.docx]

Supplement ary Material: Tables S1–S4

Table S1 Two-sample Mendelian randomization results for blood-derived eQTLs associated with COPD (filtered by P < 0.05, Heterogeneity P > 0.05, and Egger intercept P > 0.05)

| Gene ID | No. of SNPs | Effect size (β) | Standard error (SE) | P-value | Odds ratio (OR) | 95% CI lower bound | 95% CI upper bound | Cochran’s Q statistic | Heterogeneity P-value | Egger intercept | Egger intercept SE | Egger intercept P-value |
| --- | --- | --- | --- | --- | --- | --- | --- | --- | --- | --- | --- | --- |
| 7SK | 4 | 0.092 | 0.035 | 0.008 | 1.096 | 1.024 | 1.174 | 2.003 | 0.572 | -0.017 | 0.026 | 0.571 |
| AAMDC | 6 | -0.046 | 0.021 | 0.031 | 0.955 | 0.916 | 0.996 | 5.328 | 0.377 | 0.019 | 0.013 | 0.234 |
| AATF | 7 | -0.146 | 0.070 | 0.039 | 0.865 | 0.753 | 0.992 | 8.559 | 0.200 | -0.024 | 0.024 | 0.364 |
| ABCA13 | 3 | 0.263 | 0.129 | 0.041 | 1.301 | 1.011 | 1.675 | 1.081 | 0.582 | -0.025 | 0.043 | 0.667 |
| ABCB9 | 24 | -0.075 | 0.029 | 0.011 | 0.928 | 0.876 | 0.983 | 29.983 | 0.150 | 0.012 | 0.008 | 0.138 |
| ABCC2 | 10 | 0.149 | 0.053 | 0.005 | 1.160 | 1.045 | 1.289 | 10.728 | 0.295 | 0.007 | 0.019 | 0.716 |
| ABCD2 | 9 | -0.103 | 0.049 | 0.034 | 0.902 | 0.820 | 0.992 | 7.899 | 0.443 | 0.006 | 0.010 | 0.545 |
| ABHD14A | 4 | -0.240 | 0.109 | 0.028 | 0.787 | 0.635 | 0.974 | 5.246 | 0.155 | -0.001 | 0.027 | 0.977 |
| ABHD14B | 12 | -0.159 | 0.039 | 0.000 | 0.853 | 0.790 | 0.921 | 8.628 | 0.656 | 0.010 | 0.011 | 0.358 |
| ABHD5 | 10 | -0.120 | 0.050 | 0.016 | 0.887 | 0.804 | 0.978 | 12.091 | 0.208 | 0.006 | 0.014 | 0.691 |
| AC000078.5 | 17 | 0.036 | 0.015 | 0.014 | 1.036 | 1.007 | 1.066 | 22.152 | 0.138 | 0.004 | 0.010 | 0.725 |
| AC002480.3 | 3 | 0.082 | 0.034 | 0.018 | 1.085 | 1.014 | 1.161 | 1.176 | 0.555 | -0.028 | 0.063 | 0.731 |
| AC004840.9 | 22 | 0.033 | 0.012 | 0.004 | 1.034 | 1.011 | 1.058 | 25.418 | 0.230 | 0.005 | 0.008 | 0.522 |
| AC005682.6 | 16 | 0.029 | 0.014 | 0.043 | 1.029 | 1.001 | 1.058 | 13.125 | 0.593 | 0.001 | 0.012 | 0.923 |
| AC007000.12 | 6 | -0.053 | 0.023 | 0.024 | 0.949 | 0.906 | 0.993 | 1.120 | 0.952 | 0.006 | 0.017 | 0.739 |
| AC007292.6 | 7 | -0.081 | 0.041 | 0.048 | 0.922 | 0.851 | 0.999 | 6.386 | 0.381 | 0.008 | 0.017 | 0.676 |
| AC007395.4 | 16 | -0.026 | 0.010 | 0.014 | 0.975 | 0.955 | 0.995 | 9.994 | 0.820 | -0.005 | 0.007 | 0.470 |
| AC007950.1 | 5 | -0.208 | 0.072 | 0.004 | 0.812 | 0.706 | 0.934 | 4.515 | 0.341 | -0.006 | 0.023 | 0.802 |
| AC008074.3 | 15 | 0.042 | 0.013 | 0.002 | 1.043 | 1.016 | 1.071 | 11.276 | 0.664 | 0.004 | 0.007 | 0.571 |
| AC008074.5 | 6 | 0.056 | 0.028 | 0.043 | 1.058 | 1.002 | 1.117 | 8.706 | 0.121 | 0.005 | 0.016 | 0.781 |
| AC011816.1 | 21 | 0.051 | 0.014 | 0.000 | 1.052 | 1.023 | 1.081 | 30.425 | 0.063 | 0.006 | 0.011 | 0.609 |
| AC018720.10 | 14 | 0.061 | 0.015 | 0.000 | 1.063 | 1.031 | 1.095 | 8.454 | 0.813 | -0.007 | 0.010 | 0.490 |
| AC018755.15 | 5 | -0.074 | 0.035 | 0.031 | 0.928 | 0.867 | 0.993 | 4.483 | 0.345 | 0.034 | 0.034 | 0.396 |
| AC021860.1 | 21 | -0.022 | 0.010 | 0.035 | 0.978 | 0.959 | 0.998 | 10.749 | 0.952 | 0.008 | 0.008 | 0.332 |
| AC034193.5 | 5 | 0.183 | 0.064 | 0.005 | 1.200 | 1.058 | 1.362 | 1.298 | 0.862 | 0.000 | 0.015 | 0.996 |
| AC058791.2 | 10 | -0.048 | 0.022 | 0.026 | 0.953 | 0.913 | 0.994 | 13.253 | 0.151 | 0.024 | 0.017 | 0.201 |
| AC062017.1 | 15 | 0.074 | 0.030 | 0.015 | 1.077 | 1.015 | 1.143 | 12.858 | 0.538 | 0.013 | 0.009 | 0.169 |
| AC073343.11 | 9 | -0.065 | 0.024 | 0.008 | 0.937 | 0.894 | 0.983 | 10.196 | 0.252 | -0.007 | 0.019 | 0.719 |
| AC079922.3 | 53 | 0.034 | 0.010 | 0.001 | 1.034 | 1.015 | 1.055 | 52.671 | 0.448 | 0.002 | 0.004 | 0.611 |
| AC083843.1 | 7 | -0.058 | 0.020 | 0.004 | 0.944 | 0.907 | 0.982 | 5.946 | 0.429 | -0.011 | 0.020 | 0.594 |
| AC084018.1 | 26 | -0.047 | 0.016 | 0.004 | 0.954 | 0.924 | 0.985 | 24.394 | 0.497 | -0.002 | 0.006 | 0.689 |
| AC093415.2 | 3 | -0.134 | 0.055 | 0.016 | 0.875 | 0.785 | 0.975 | 0.995 | 0.608 | 0.028 | 0.028 | 0.503 |
| AC099850.1 | 6 | 0.080 | 0.028 | 0.005 | 1.083 | 1.024 | 1.145 | 1.921 | 0.860 | -0.003 | 0.016 | 0.838 |
| AC104653.1 | 7 | -0.075 | 0.029 | 0.010 | 0.927 | 0.875 | 0.982 | 2.873 | 0.825 | 0.003 | 0.024 | 0.918 |
| AC105020.1 | 5 | -0.076 | 0.034 | 0.024 | 0.927 | 0.867 | 0.990 | 2.734 | 0.603 | 0.022 | 0.033 | 0.542 |
| AC106900.6 | 4 | -0.134 | 0.068 | 0.049 | 0.875 | 0.766 | 0.999 | 1.557 | 0.669 | -0.025 | 0.021 | 0.349 |
| AC108463.3 | 5 | 0.201 | 0.058 | 0.001 | 1.223 | 1.091 | 1.371 | 3.754 | 0.440 | -0.001 | 0.038 | 0.989 |
| AC113189.5 | 19 | -0.023 | 0.011 | 0.028 | 0.977 | 0.957 | 0.998 | 13.677 | 0.750 | -0.014 | 0.009 | 0.140 |
| AC116366.6 | 3 | -0.164 | 0.041 | 0.000 | 0.849 | 0.784 | 0.919 | 1.714 | 0.425 | 0.004 | 0.033 | 0.924 |
| AC131056.3 | 14 | 0.048 | 0.018 | 0.006 | 1.050 | 1.014 | 1.087 | 10.671 | 0.638 | 0.006 | 0.013 | 0.631 |
| AC131097.3 | 19 | -0.023 | 0.010 | 0.021 | 0.977 | 0.959 | 0.997 | 18.104 | 0.449 | -0.015 | 0.011 | 0.214 |
| AC132872.1 | 3 | -0.122 | 0.053 | 0.022 | 0.885 | 0.798 | 0.982 | 2.008 | 0.366 | -0.028 | 0.021 | 0.406 |
| AC133528.2 | 6 | 0.103 | 0.051 | 0.043 | 1.108 | 1.003 | 1.224 | 2.425 | 0.788 | 0.004 | 0.011 | 0.768 |
| AC139100.2 | 4 | -0.192 | 0.053 | 0.000 | 0.825 | 0.745 | 0.915 | 1.633 | 0.652 | -0.008 | 0.012 | 0.594 |
| ACAA1 | 6 | 0.101 | 0.045 | 0.024 | 1.106 | 1.013 | 1.208 | 3.318 | 0.651 | 0.000 | 0.012 | 0.976 |
| ACD | 6 | 0.208 | 0.057 | 0.000 | 1.232 | 1.102 | 1.377 | 3.152 | 0.676 | 0.011 | 0.019 | 0.580 |
| ACOT13 | 20 | 0.073 | 0.031 | 0.019 | 1.076 | 1.012 | 1.144 | 21.909 | 0.289 | 0.008 | 0.008 | 0.324 |
| ACSF3 | 19 | -0.095 | 0.042 | 0.024 | 0.910 | 0.838 | 0.988 | 27.133 | 0.077 | -0.009 | 0.010 | 0.381 |
| ACSM1 | 13 | -0.073 | 0.036 | 0.046 | 0.930 | 0.866 | 0.999 | 10.087 | 0.608 | 0.001 | 0.008 | 0.894 |
| ACVR1B | 7 | -0.119 | 0.055 | 0.030 | 0.888 | 0.797 | 0.989 | 1.489 | 0.960 | 0.001 | 0.012 | 0.911 |
| ADAM15 | 44 | -0.034 | 0.014 | 0.013 | 0.966 | 0.940 | 0.993 | 46.359 | 0.336 | 0.006 | 0.005 | 0.264 |
| ADAM19 | 27 | 0.108 | 0.022 | 0.000 | 1.114 | 1.068 | 1.162 | 22.550 | 0.658 | -0.004 | 0.006 | 0.553 |
| ADAMTSL4 | 9 | -0.101 | 0.042 | 0.017 | 0.904 | 0.832 | 0.982 | 14.195 | 0.077 | -0.009 | 0.009 | 0.319 |
| ADAT2 | 9 | -0.071 | 0.029 | 0.015 | 0.931 | 0.880 | 0.986 | 4.941 | 0.764 | -0.007 | 0.011 | 0.547 |
| ADCK1 | 53 | -0.039 | 0.011 | 0.000 | 0.962 | 0.942 | 0.983 | 50.083 | 0.550 | -0.004 | 0.003 | 0.235 |
| ADCK2 | 32 | 0.038 | 0.017 | 0.022 | 1.039 | 1.006 | 1.074 | 20.208 | 0.931 | -0.001 | 0.006 | 0.886 |
| ADCY4 | 3 | -0.231 | 0.111 | 0.038 | 0.794 | 0.638 | 0.988 | 0.218 | 0.897 | -0.046 | 0.099 | 0.722 |
| ADCY7 | 19 | -0.051 | 0.020 | 0.012 | 0.950 | 0.913 | 0.989 | 13.880 | 0.737 | 0.002 | 0.009 | 0.847 |
| ADD2 | 8 | -0.142 | 0.054 | 0.009 | 0.868 | 0.781 | 0.965 | 6.289 | 0.506 | -0.019 | 0.020 | 0.375 |
| ADHFE1 | 70 | -0.028 | 0.010 | 0.007 | 0.972 | 0.952 | 0.992 | 64.118 | 0.644 | 0.004 | 0.005 | 0.395 |
| ADO | 14 | -0.180 | 0.035 | 0.000 | 0.835 | 0.779 | 0.894 | 9.971 | 0.696 | -0.012 | 0.012 | 0.365 |
| ADORA2B | 33 | -0.041 | 0.017 | 0.015 | 0.959 | 0.928 | 0.992 | 28.769 | 0.631 | 0.002 | 0.008 | 0.767 |
| ADRB2 | 4 | 0.173 | 0.078 | 0.026 | 1.188 | 1.021 | 1.383 | 2.174 | 0.537 | 0.007 | 0.025 | 0.801 |
| AF131215.2 | 114 | 0.093 | 0.006 | 0.000 | 1.097 | 1.085 | 1.110 | 114.302 | 0.448 | 0.009 | 0.006 | 0.125 |
| AF131215.9 | 122 | 0.085 | 0.005 | 0.000 | 1.088 | 1.077 | 1.100 | 124.588 | 0.393 | 0.003 | 0.006 | 0.620 |
| AF216667.1 | 4 | 0.048 | 0.023 | 0.035 | 1.049 | 1.003 | 1.097 | 0.506 | 0.918 | -0.017 | 0.037 | 0.698 |
| AFG3L1P | 13 | 0.146 | 0.032 | 0.000 | 1.158 | 1.087 | 1.232 | 7.407 | 0.830 | 0.008 | 0.009 | 0.435 |
| AGA | 74 | 0.020 | 0.010 | 0.047 | 1.020 | 1.000 | 1.041 | 56.425 | 0.924 | 0.004 | 0.004 | 0.230 |
| AGPAT1 | 6 | -0.183 | 0.073 | 0.013 | 0.833 | 0.721 | 0.962 | 9.544 | 0.089 | -0.011 | 0.030 | 0.739 |
| AGPAT4 | 10 | -0.144 | 0.054 | 0.008 | 0.866 | 0.779 | 0.963 | 4.227 | 0.896 | -0.009 | 0.017 | 0.604 |
| AHSA2 | 53 | 0.030 | 0.011 | 0.005 | 1.031 | 1.009 | 1.052 | 63.509 | 0.132 | -0.010 | 0.005 | 0.064 |
| AIM1 | 14 | 0.073 | 0.034 | 0.033 | 1.076 | 1.006 | 1.151 | 13.943 | 0.378 | 0.008 | 0.010 | 0.466 |
| AKAP10 | 58 | 0.028 | 0.011 | 0.012 | 1.029 | 1.006 | 1.052 | 56.545 | 0.492 | -0.001 | 0.005 | 0.745 |
| AKAP7 | 51 | 0.041 | 0.015 | 0.007 | 1.042 | 1.011 | 1.074 | 47.224 | 0.585 | 0.005 | 0.005 | 0.300 |
| AKIP1 | 61 | 0.033 | 0.012 | 0.007 | 1.034 | 1.009 | 1.059 | 50.197 | 0.812 | -0.002 | 0.005 | 0.654 |
| AKIRIN2 | 5 | 0.208 | 0.104 | 0.044 | 1.232 | 1.005 | 1.509 | 8.516 | 0.074 | 0.024 | 0.013 | 0.164 |
| AKNA | 16 | 0.069 | 0.035 | 0.047 | 1.071 | 1.001 | 1.147 | 15.640 | 0.406 | 0.011 | 0.009 | 0.238 |
| AKR1C1 | 14 | -0.099 | 0.032 | 0.002 | 0.906 | 0.850 | 0.965 | 4.135 | 0.990 | -0.007 | 0.011 | 0.543 |
| AKR7A3 | 13 | 0.102 | 0.048 | 0.034 | 1.107 | 1.008 | 1.216 | 11.862 | 0.457 | 0.000 | 0.010 | 0.983 |
| AL049840.1 | 21 | -0.031 | 0.015 | 0.045 | 0.970 | 0.941 | 0.999 | 28.617 | 0.096 | -0.017 | 0.015 | 0.267 |
| AL135998.1 | 6 | 0.065 | 0.025 | 0.008 | 1.067 | 1.017 | 1.120 | 3.776 | 0.582 | -0.012 | 0.019 | 0.580 |
| ALDH1A1 | 35 | -0.077 | 0.019 | 0.000 | 0.926 | 0.892 | 0.961 | 22.121 | 0.942 | -0.003 | 0.005 | 0.513 |
| ALDH2 | 21 | -0.051 | 0.025 | 0.038 | 0.950 | 0.905 | 0.997 | 20.734 | 0.413 | 0.006 | 0.007 | 0.372 |
| ALDH7A1 | 13 | -0.084 | 0.027 | 0.002 | 0.920 | 0.872 | 0.969 | 7.764 | 0.803 | -0.009 | 0.008 | 0.296 |
| ALDOC | 16 | -0.063 | 0.028 | 0.027 | 0.939 | 0.889 | 0.993 | 14.296 | 0.503 | 0.009 | 0.012 | 0.462 |
| ALG1L13P | 27 | 0.120 | 0.017 | 0.000 | 1.128 | 1.092 | 1.165 | 31.653 | 0.205 | 0.014 | 0.011 | 0.228 |
| ALG5 | 5 | -0.137 | 0.061 | 0.025 | 0.872 | 0.774 | 0.983 | 2.583 | 0.630 | -0.009 | 0.019 | 0.667 |
| AMACR | 19 | -0.052 | 0.023 | 0.024 | 0.949 | 0.908 | 0.993 | 13.074 | 0.787 | 0.000 | 0.007 | 0.940 |
| AMFR | 60 | -0.055 | 0.012 | 0.000 | 0.947 | 0.925 | 0.969 | 64.451 | 0.292 | -0.007 | 0.004 | 0.137 |
| AMT | 27 | -0.052 | 0.022 | 0.021 | 0.950 | 0.909 | 0.992 | 35.670 | 0.098 | -0.012 | 0.011 | 0.287 |
| ANAPC7 | 6 | 0.253 | 0.085 | 0.003 | 1.288 | 1.091 | 1.521 | 7.426 | 0.191 | 0.026 | 0.032 | 0.457 |
| ANGEL1 | 29 | -0.060 | 0.021 | 0.005 | 0.941 | 0.903 | 0.982 | 38.316 | 0.093 | -0.010 | 0.008 | 0.212 |
| ANGPTL6 | 9 | 0.084 | 0.039 | 0.031 | 1.088 | 1.008 | 1.175 | 6.461 | 0.596 | -0.022 | 0.014 | 0.177 |
| ANKIB1 | 9 | 0.115 | 0.030 | 0.000 | 1.122 | 1.057 | 1.191 | 6.372 | 0.606 | -0.005 | 0.012 | 0.694 |
| ANKLE1 | 10 | -0.159 | 0.035 | 0.000 | 0.853 | 0.797 | 0.913 | 11.064 | 0.271 | 0.006 | 0.009 | 0.546 |
| ANKRD35 | 15 | -0.077 | 0.037 | 0.035 | 0.926 | 0.862 | 0.994 | 19.166 | 0.159 | -0.013 | 0.023 | 0.568 |
| ANKRD36BP2 | 5 | 0.107 | 0.055 | 0.050 | 1.113 | 1.000 | 1.239 | 1.365 | 0.850 | 0.001 | 0.010 | 0.957 |
| ANKRD42 | 6 | 0.168 | 0.064 | 0.009 | 1.183 | 1.044 | 1.341 | 2.298 | 0.807 | 0.007 | 0.014 | 0.661 |
| ANKS6 | 4 | -0.160 | 0.077 | 0.038 | 0.852 | 0.733 | 0.991 | 2.458 | 0.483 | 0.005 | 0.023 | 0.848 |
| ANO5 | 13 | -0.076 | 0.036 | 0.036 | 0.927 | 0.864 | 0.995 | 5.815 | 0.925 | -0.009 | 0.009 | 0.300 |
| ANXA1 | 34 | -0.033 | 0.016 | 0.043 | 0.968 | 0.938 | 0.999 | 20.554 | 0.955 | 0.006 | 0.007 | 0.415 |
| ANXA11 | 34 | -0.060 | 0.021 | 0.004 | 0.942 | 0.904 | 0.981 | 21.932 | 0.929 | -0.008 | 0.006 | 0.175 |
| ANXA2 | 23 | -0.078 | 0.034 | 0.022 | 0.925 | 0.865 | 0.989 | 25.988 | 0.252 | -0.003 | 0.008 | 0.668 |
| ANXA5 | 62 | 0.025 | 0.011 | 0.024 | 1.026 | 1.003 | 1.048 | 45.734 | 0.927 | -0.003 | 0.004 | 0.482 |
| AOAH-IT1 | 8 | 0.051 | 0.023 | 0.028 | 1.053 | 1.005 | 1.102 | 11.287 | 0.127 | 0.013 | 0.011 | 0.282 |
| AP001055.1 | 3 | -0.081 | 0.040 | 0.043 | 0.922 | 0.853 | 0.997 | 1.962 | 0.375 | 0.004 | 0.028 | 0.901 |
| AP001055.6 | 6 | 0.121 | 0.056 | 0.031 | 1.128 | 1.011 | 1.259 | 3.837 | 0.573 | -0.021 | 0.013 | 0.192 |
| AP001625.6 | 7 | 0.043 | 0.022 | 0.048 | 1.044 | 1.000 | 1.089 | 4.030 | 0.673 | 0.012 | 0.010 | 0.290 |
| AP006621.6 | 29 | -0.039 | 0.013 | 0.003 | 0.962 | 0.938 | 0.987 | 33.297 | 0.225 | -0.002 | 0.009 | 0.841 |
| AP1G1 | 7 | -0.364 | 0.077 | 0.000 | 0.695 | 0.598 | 0.808 | 6.406 | 0.379 | -0.007 | 0.016 | 0.695 |
| AP3M2 | 26 | -0.095 | 0.026 | 0.000 | 0.909 | 0.864 | 0.957 | 31.213 | 0.182 | 0.013 | 0.009 | 0.164 |
| AP3S2 | 40 | -0.023 | 0.011 | 0.049 | 0.978 | 0.956 | 1.000 | 34.427 | 0.678 | 0.004 | 0.005 | 0.426 |
| AP4B1-AS1 | 5 | -0.089 | 0.029 | 0.002 | 0.914 | 0.864 | 0.968 | 3.115 | 0.539 | -0.023 | 0.019 | 0.316 |
| AP4B1 | 17 | -0.096 | 0.034 | 0.005 | 0.908 | 0.850 | 0.971 | 18.275 | 0.308 | -0.028 | 0.013 | 0.052 |
| APEH | 20 | -0.102 | 0.026 | 0.000 | 0.903 | 0.857 | 0.951 | 17.290 | 0.570 | -0.010 | 0.009 | 0.297 |
| APOL3 | 10 | -0.141 | 0.060 | 0.019 | 0.869 | 0.773 | 0.977 | 1.447 | 0.998 | -0.016 | 0.015 | 0.330 |
| APOLD1 | 18 | 0.074 | 0.035 | 0.035 | 1.076 | 1.005 | 1.153 | 26.664 | 0.063 | 0.010 | 0.010 | 0.320 |
| APRT | 11 | -0.072 | 0.036 | 0.046 | 0.931 | 0.868 | 0.999 | 5.570 | 0.850 | 0.007 | 0.010 | 0.494 |
| ARFGAP3 | 17 | -0.100 | 0.037 | 0.008 | 0.905 | 0.841 | 0.974 | 6.556 | 0.981 | -0.002 | 0.009 | 0.815 |
| ARFIP1 | 59 | -0.024 | 0.010 | 0.021 | 0.976 | 0.956 | 0.996 | 43.313 | 0.925 | 0.005 | 0.005 | 0.267 |
| ARHGAP12 | 31 | 0.054 | 0.025 | 0.030 | 1.055 | 1.005 | 1.108 | 36.185 | 0.202 | 0.001 | 0.007 | 0.865 |
| ARHGEF18 | 16 | 0.072 | 0.028 | 0.011 | 1.074 | 1.016 | 1.136 | 15.417 | 0.422 | -0.006 | 0.007 | 0.393 |
| ARL6IP4 | 9 | 0.094 | 0.045 | 0.035 | 1.098 | 1.007 | 1.199 | 5.266 | 0.729 | 0.008 | 0.018 | 0.678 |
| ARMC3 | 10 | 0.095 | 0.042 | 0.024 | 1.100 | 1.013 | 1.195 | 9.261 | 0.414 | -0.023 | 0.013 | 0.106 |
| ARNT | 11 | 0.074 | 0.037 | 0.045 | 1.077 | 1.002 | 1.158 | 10.106 | 0.431 | -0.003 | 0.010 | 0.764 |
| ARPC1B | 13 | -0.112 | 0.040 | 0.005 | 0.894 | 0.828 | 0.967 | 7.840 | 0.797 | -0.008 | 0.013 | 0.529 |
| ARRB2 | 32 | -0.061 | 0.020 | 0.002 | 0.941 | 0.904 | 0.979 | 37.360 | 0.200 | 0.002 | 0.006 | 0.769 |
| ARRDC1 | 13 | 0.097 | 0.035 | 0.006 | 1.101 | 1.028 | 1.180 | 7.077 | 0.852 | 0.012 | 0.009 | 0.198 |
| ARRDC2 | 11 | 0.071 | 0.030 | 0.018 | 1.073 | 1.012 | 1.138 | 8.410 | 0.589 | 0.002 | 0.008 | 0.852 |
| ARRDC4 | 33 | 0.034 | 0.015 | 0.019 | 1.035 | 1.006 | 1.065 | 20.426 | 0.943 | -0.011 | 0.006 | 0.071 |
| ASRGL1 | 24 | -0.036 | 0.017 | 0.038 | 0.964 | 0.932 | 0.998 | 24.311 | 0.387 | 0.003 | 0.007 | 0.652 |
| ATF1 | 20 | -0.073 | 0.029 | 0.011 | 0.930 | 0.879 | 0.983 | 20.703 | 0.353 | 0.004 | 0.008 | 0.651 |
| ATF6B | 14 | 0.161 | 0.027 | 0.000 | 1.175 | 1.115 | 1.238 | 19.926 | 0.097 | -0.002 | 0.011 | 0.824 |
| ATP11B | 14 | 0.092 | 0.039 | 0.018 | 1.096 | 1.016 | 1.183 | 11.523 | 0.567 | 0.005 | 0.010 | 0.646 |
| ATP13A4 | 13 | -0.084 | 0.032 | 0.009 | 0.919 | 0.863 | 0.979 | 14.141 | 0.292 | 0.010 | 0.016 | 0.552 |
| ATP6V0A2 | 7 | -0.347 | 0.065 | 0.000 | 0.707 | 0.622 | 0.804 | 5.300 | 0.506 | 0.010 | 0.015 | 0.533 |
| ATP6V0D1 | 15 | 0.098 | 0.021 | 0.000 | 1.103 | 1.058 | 1.150 | 11.150 | 0.674 | 0.000 | 0.007 | 1.000 |
| ATP8A1 | 17 | -0.106 | 0.034 | 0.002 | 0.899 | 0.842 | 0.960 | 12.838 | 0.685 | 0.003 | 0.007 | 0.725 |
| ATP8B3 | 8 | -0.084 | 0.038 | 0.027 | 0.919 | 0.854 | 0.990 | 2.721 | 0.910 | -0.020 | 0.018 | 0.304 |
| ATXN1 | 13 | 0.075 | 0.030 | 0.013 | 1.078 | 1.016 | 1.144 | 12.440 | 0.411 | -0.007 | 0.008 | 0.396 |
| B3GAT1 | 19 | -0.079 | 0.027 | 0.004 | 0.924 | 0.876 | 0.975 | 17.344 | 0.500 | 0.001 | 0.007 | 0.907 |
| BACE1 | 15 | -0.114 | 0.030 | 0.000 | 0.893 | 0.841 | 0.947 | 9.599 | 0.791 | -0.020 | 0.011 | 0.091 |
| BACE2 | 13 | -0.087 | 0.041 | 0.032 | 0.916 | 0.846 | 0.992 | 14.362 | 0.278 | -0.007 | 0.009 | 0.447 |
| BAI1 | 10 | 0.094 | 0.048 | 0.049 | 1.099 | 1.001 | 1.207 | 8.855 | 0.451 | -0.017 | 0.011 | 0.180 |
| BAIAP3 | 36 | -0.079 | 0.018 | 0.000 | 0.924 | 0.892 | 0.957 | 34.502 | 0.492 | 0.001 | 0.005 | 0.796 |
| BATF3 | 24 | 0.071 | 0.023 | 0.002 | 1.074 | 1.026 | 1.124 | 17.945 | 0.760 | 0.003 | 0.007 | 0.667 |
| BAX | 18 | 0.098 | 0.029 | 0.001 | 1.103 | 1.042 | 1.167 | 15.604 | 0.552 | 0.010 | 0.009 | 0.304 |
| BBIP1 | 6 | -0.090 | 0.032 | 0.005 | 0.914 | 0.858 | 0.974 | 1.786 | 0.878 | 0.007 | 0.057 | 0.909 |
| BBS12 | 10 | -0.117 | 0.054 | 0.031 | 0.889 | 0.800 | 0.989 | 10.988 | 0.277 | -0.011 | 0.015 | 0.478 |
| BCKDK | 24 | -0.146 | 0.030 | 0.000 | 0.864 | 0.814 | 0.917 | 33.189 | 0.078 | -0.008 | 0.012 | 0.527 |
| BCL7A | 6 | -0.159 | 0.058 | 0.006 | 0.853 | 0.761 | 0.956 | 6.188 | 0.288 | -0.003 | 0.017 | 0.864 |
| BEAN1 | 3 | -0.124 | 0.057 | 0.030 | 0.883 | 0.790 | 0.988 | 1.285 | 0.526 | -0.013 | 0.013 | 0.509 |
| BICD2 | 36 | 0.040 | 0.017 | 0.019 | 1.041 | 1.007 | 1.077 | 37.210 | 0.368 | 0.000 | 0.006 | 0.954 |
| BIN1 | 52 | -0.032 | 0.013 | 0.015 | 0.968 | 0.943 | 0.994 | 46.478 | 0.654 | 0.002 | 0.005 | 0.648 |
| BIN2 | 13 | 0.049 | 0.023 | 0.031 | 1.050 | 1.004 | 1.097 | 9.174 | 0.688 | 0.009 | 0.009 | 0.355 |
| BMP8A | 12 | 0.046 | 0.019 | 0.012 | 1.048 | 1.010 | 1.086 | 8.973 | 0.624 | 0.010 | 0.012 | 0.415 |
| BMPR2 | 23 | 0.109 | 0.029 | 0.000 | 1.115 | 1.053 | 1.180 | 30.863 | 0.099 | 0.006 | 0.010 | 0.553 |
| BNC2 | 13 | 0.093 | 0.036 | 0.009 | 1.098 | 1.024 | 1.177 | 12.088 | 0.439 | 0.008 | 0.010 | 0.391 |
| BNIP2 | 6 | -0.141 | 0.057 | 0.013 | 0.868 | 0.777 | 0.970 | 2.873 | 0.720 | 0.013 | 0.016 | 0.479 |
| BNIPL | 30 | 0.058 | 0.022 | 0.008 | 1.059 | 1.015 | 1.105 | 25.563 | 0.649 | -0.004 | 0.006 | 0.548 |
| BOK | 26 | 0.044 | 0.022 | 0.043 | 1.045 | 1.001 | 1.090 | 21.761 | 0.650 | -0.003 | 0.007 | 0.697 |
| BORA | 11 | 0.080 | 0.029 | 0.006 | 1.083 | 1.023 | 1.147 | 11.779 | 0.300 | 0.015 | 0.007 | 0.059 |
| BRCA1 | 13 | 0.105 | 0.036 | 0.003 | 1.110 | 1.036 | 1.190 | 7.655 | 0.811 | -0.010 | 0.017 | 0.545 |
| BRCA2 | 4 | -0.165 | 0.071 | 0.020 | 0.848 | 0.738 | 0.975 | 1.114 | 0.774 | -0.030 | 0.029 | 0.412 |
| BRD3 | 15 | 0.045 | 0.022 | 0.047 | 1.046 | 1.001 | 1.092 | 10.830 | 0.699 | 0.017 | 0.013 | 0.228 |
| BRD7 | 33 | -0.052 | 0.014 | 0.000 | 0.949 | 0.923 | 0.976 | 35.418 | 0.310 | -0.004 | 0.006 | 0.470 |
| BRI3 | 18 | 0.059 | 0.021 | 0.005 | 1.061 | 1.018 | 1.106 | 14.922 | 0.601 | 0.012 | 0.012 | 0.294 |
| BRK1 | 60 | -0.036 | 0.011 | 0.001 | 0.965 | 0.945 | 0.985 | 51.711 | 0.739 | -0.001 | 0.004 | 0.779 |
| BRPF3 | 4 | 0.213 | 0.102 | 0.037 | 1.237 | 1.013 | 1.511 | 1.923 | 0.589 | -0.019 | 0.026 | 0.545 |
| BTBD11 | 68 | -0.038 | 0.012 | 0.001 | 0.963 | 0.941 | 0.985 | 72.476 | 0.302 | 0.008 | 0.005 | 0.104 |
| BTN2A3P | 3 | 0.150 | 0.068 | 0.027 | 1.162 | 1.017 | 1.328 | 0.977 | 0.613 | -0.011 | 0.020 | 0.686 |
| BTN3A2 | 68 | -0.017 | 0.008 | 0.026 | 0.983 | 0.968 | 0.998 | 50.623 | 0.932 | -0.001 | 0.004 | 0.838 |
| BX322557.10 | 11 | -0.100 | 0.031 | 0.001 | 0.905 | 0.851 | 0.961 | 10.207 | 0.423 | -0.003 | 0.010 | 0.791 |
| BZRAP1-AS1 | 14 | -0.058 | 0.022 | 0.007 | 0.944 | 0.905 | 0.985 | 12.878 | 0.457 | -0.003 | 0.013 | 0.793 |
| C10orf105 | 21 | 0.069 | 0.026 | 0.007 | 1.071 | 1.019 | 1.127 | 26.297 | 0.156 | -0.002 | 0.009 | 0.855 |
| C10orf11 | 39 | -0.052 | 0.015 | 0.001 | 0.949 | 0.921 | 0.978 | 25.297 | 0.943 | -0.007 | 0.007 | 0.362 |
| C10orf128 | 53 | -0.030 | 0.013 | 0.022 | 0.971 | 0.946 | 0.996 | 27.997 | 0.997 | -0.007 | 0.005 | 0.210 |
| C10orf68 | 5 | 0.096 | 0.047 | 0.040 | 1.101 | 1.004 | 1.206 | 3.944 | 0.414 | 0.000 | 0.015 | 0.983 |
| C10orf88 | 31 | 0.058 | 0.022 | 0.008 | 1.060 | 1.015 | 1.106 | 23.245 | 0.805 | -0.001 | 0.007 | 0.884 |
| C11orf58 | 7 | 0.141 | 0.053 | 0.008 | 1.151 | 1.038 | 1.277 | 4.864 | 0.561 | -0.005 | 0.017 | 0.792 |
| C11orf73 | 21 | 0.075 | 0.033 | 0.023 | 1.078 | 1.010 | 1.151 | 13.514 | 0.854 | 0.001 | 0.008 | 0.881 |
| C12orf45 | 5 | 0.114 | 0.040 | 0.004 | 1.121 | 1.036 | 1.213 | 1.016 | 0.907 | -0.009 | 0.016 | 0.603 |
| C12orf76 | 15 | 0.138 | 0.056 | 0.013 | 1.148 | 1.030 | 1.280 | 22.259 | 0.073 | -0.002 | 0.011 | 0.867 |
| C14orf101 | 3 | 0.129 | 0.062 | 0.038 | 1.137 | 1.007 | 1.284 | 1.551 | 0.460 | -0.018 | 0.016 | 0.446 |
| C15orf38 | 48 | 0.023 | 0.011 | 0.032 | 1.023 | 1.002 | 1.045 | 38.994 | 0.790 | 0.004 | 0.004 | 0.418 |
| C15orf52 | 11 | 0.106 | 0.029 | 0.000 | 1.112 | 1.052 | 1.176 | 8.140 | 0.615 | 0.004 | 0.015 | 0.786 |
| C15orf57 | 37 | -0.045 | 0.019 | 0.015 | 0.956 | 0.922 | 0.991 | 42.408 | 0.214 | -0.009 | 0.006 | 0.162 |
| C16orf55 | 5 | 0.150 | 0.065 | 0.022 | 1.162 | 1.022 | 1.321 | 3.361 | 0.499 | 0.023 | 0.018 | 0.289 |
| C16orf74 | 18 | 0.062 | 0.028 | 0.026 | 1.063 | 1.007 | 1.123 | 7.700 | 0.973 | 0.000 | 0.008 | 0.964 |
| C16orf86 | 9 | 0.098 | 0.038 | 0.011 | 1.103 | 1.023 | 1.189 | 9.592 | 0.295 | -0.008 | 0.009 | 0.403 |
| C16orf88 | 13 | -0.056 | 0.028 | 0.046 | 0.946 | 0.895 | 0.999 | 6.620 | 0.882 | -0.001 | 0.007 | 0.930 |
| C16orf93 | 8 | -0.264 | 0.061 | 0.000 | 0.768 | 0.682 | 0.865 | 9.158 | 0.242 | -0.015 | 0.015 | 0.357 |
| C18orf8 | 19 | -0.105 | 0.030 | 0.000 | 0.900 | 0.850 | 0.954 | 11.449 | 0.874 | 0.009 | 0.009 | 0.339 |
| C19orf12 | 49 | -0.036 | 0.012 | 0.004 | 0.964 | 0.941 | 0.988 | 49.512 | 0.413 | -0.004 | 0.004 | 0.295 |
| C19orf44 | 12 | 0.103 | 0.039 | 0.008 | 1.108 | 1.027 | 1.196 | 16.438 | 0.126 | 0.005 | 0.013 | 0.684 |
| C19orf45 | 5 | -0.128 | 0.047 | 0.006 | 0.880 | 0.803 | 0.964 | 2.568 | 0.632 | 0.023 | 0.023 | 0.395 |
| C1GALT1 | 47 | 0.028 | 0.014 | 0.036 | 1.029 | 1.002 | 1.057 | 46.403 | 0.456 | 0.007 | 0.005 | 0.149 |
| C1orf122 | 15 | -0.099 | 0.029 | 0.001 | 0.906 | 0.856 | 0.958 | 7.028 | 0.934 | 0.006 | 0.010 | 0.517 |
| C1orf21 | 7 | 0.160 | 0.066 | 0.016 | 1.173 | 1.031 | 1.336 | 5.574 | 0.473 | 0.005 | 0.012 | 0.712 |
| C1QA | 19 | -0.086 | 0.032 | 0.007 | 0.917 | 0.861 | 0.977 | 12.989 | 0.792 | 0.007 | 0.006 | 0.298 |
| C1QB | 41 | -0.036 | 0.017 | 0.032 | 0.965 | 0.934 | 0.997 | 43.493 | 0.325 | 0.000 | 0.006 | 0.938 |
| C1QC | 10 | -0.101 | 0.046 | 0.026 | 0.903 | 0.826 | 0.988 | 1.333 | 0.998 | 0.005 | 0.010 | 0.591 |
| C1QTNF4 | 31 | -0.038 | 0.017 | 0.023 | 0.962 | 0.931 | 0.995 | 27.305 | 0.607 | -0.005 | 0.011 | 0.656 |
| C2 | 4 | 0.341 | 0.096 | 0.000 | 1.407 | 1.165 | 1.699 | 7.622 | 0.055 | 0.069 | 0.060 | 0.368 |
| C20orf111 | 36 | -0.043 | 0.017 | 0.010 | 0.958 | 0.927 | 0.990 | 39.025 | 0.294 | 0.003 | 0.007 | 0.628 |
| C20orf196 | 24 | -0.043 | 0.021 | 0.044 | 0.958 | 0.919 | 0.999 | 22.930 | 0.465 | 0.004 | 0.007 | 0.564 |
| C22orf29 | 26 | -0.052 | 0.021 | 0.014 | 0.949 | 0.911 | 0.990 | 30.658 | 0.201 | 0.001 | 0.009 | 0.898 |
| C2orf40 | 20 | 0.075 | 0.031 | 0.015 | 1.077 | 1.014 | 1.144 | 24.523 | 0.177 | 0.009 | 0.008 | 0.241 |
| C3AR1 | 50 | 0.020 | 0.010 | 0.042 | 1.020 | 1.001 | 1.040 | 52.973 | 0.324 | 0.000 | 0.005 | 0.979 |
| C3orf37 | 12 | -0.095 | 0.047 | 0.044 | 0.909 | 0.828 | 0.997 | 10.491 | 0.487 | 0.001 | 0.008 | 0.931 |
| C4BPA | 37 | -0.018 | 0.006 | 0.007 | 0.983 | 0.970 | 0.995 | 41.307 | 0.250 | -0.008 | 0.004 | 0.051 |
| C4orf3 | 35 | 0.039 | 0.019 | 0.038 | 1.040 | 1.002 | 1.079 | 15.546 | 0.997 | 0.000 | 0.006 | 0.933 |
| C5 | 65 | 0.048 | 0.012 | 0.000 | 1.049 | 1.025 | 1.073 | 60.574 | 0.598 | -0.002 | 0.004 | 0.603 |
| C6orf164 | 24 | 0.031 | 0.011 | 0.005 | 1.031 | 1.009 | 1.054 | 18.038 | 0.755 | 0.007 | 0.007 | 0.345 |
| C6orf211 | 8 | 0.119 | 0.050 | 0.016 | 1.127 | 1.022 | 1.242 | 12.992 | 0.072 | -0.002 | 0.016 | 0.924 |
| C6orf3 | 25 | 0.020 | 0.009 | 0.024 | 1.021 | 1.003 | 1.039 | 26.850 | 0.311 | 0.006 | 0.007 | 0.390 |
| C7orf13 | 38 | 0.065 | 0.018 | 0.000 | 1.068 | 1.031 | 1.105 | 34.839 | 0.571 | 0.004 | 0.005 | 0.431 |
| C7orf61 | 4 | -0.288 | 0.117 | 0.014 | 0.750 | 0.596 | 0.943 | 4.612 | 0.203 | -0.087 | 0.050 | 0.227 |
| C8G | 4 | 0.141 | 0.061 | 0.020 | 1.152 | 1.022 | 1.298 | 2.312 | 0.510 | 0.021 | 0.020 | 0.414 |
| C8orf46 | 31 | 0.059 | 0.021 | 0.006 | 1.061 | 1.017 | 1.107 | 28.982 | 0.519 | 0.010 | 0.008 | 0.218 |
| C9orf37 | 4 | -0.158 | 0.072 | 0.029 | 0.854 | 0.741 | 0.984 | 1.288 | 0.732 | -0.002 | 0.015 | 0.931 |
| CABP5 | 28 | -0.078 | 0.029 | 0.007 | 0.925 | 0.874 | 0.979 | 24.071 | 0.626 | -0.007 | 0.007 | 0.349 |
| CACNA1I | 4 | -0.178 | 0.068 | 0.009 | 0.837 | 0.733 | 0.956 | 0.825 | 0.844 | 0.022 | 0.026 | 0.488 |
| CALB1 | 9 | 0.099 | 0.045 | 0.026 | 1.104 | 1.012 | 1.205 | 6.727 | 0.566 | -0.001 | 0.012 | 0.947 |
| CALCOCO2 | 18 | 0.063 | 0.027 | 0.019 | 1.065 | 1.011 | 1.123 | 9.364 | 0.928 | 0.001 | 0.007 | 0.843 |
| CALU | 15 | 0.079 | 0.036 | 0.029 | 1.082 | 1.008 | 1.162 | 17.285 | 0.241 | 0.011 | 0.013 | 0.416 |
| CAPG | 42 | 0.024 | 0.010 | 0.019 | 1.024 | 1.004 | 1.045 | 37.919 | 0.608 | -0.005 | 0.005 | 0.353 |
| CAPS | 23 | -0.054 | 0.024 | 0.021 | 0.947 | 0.905 | 0.992 | 26.814 | 0.218 | -0.008 | 0.010 | 0.419 |
| CBS | 75 | 0.031 | 0.010 | 0.003 | 1.031 | 1.010 | 1.052 | 51.901 | 0.976 | 0.005 | 0.004 | 0.274 |
| CBX1 | 10 | -0.098 | 0.031 | 0.002 | 0.907 | 0.853 | 0.964 | 8.724 | 0.463 | 0.001 | 0.016 | 0.938 |
| CCBL2 | 41 | 0.042 | 0.017 | 0.015 | 1.043 | 1.008 | 1.078 | 35.393 | 0.678 | 0.005 | 0.006 | 0.483 |
| CCDC112 | 9 | 0.136 | 0.047 | 0.004 | 1.146 | 1.045 | 1.256 | 11.357 | 0.182 | 0.006 | 0.014 | 0.691 |
| CCDC114 | 8 | 0.126 | 0.051 | 0.014 | 1.134 | 1.026 | 1.253 | 5.636 | 0.583 | -0.020 | 0.016 | 0.262 |
| CCDC136 | 11 | 0.091 | 0.039 | 0.021 | 1.095 | 1.014 | 1.182 | 4.753 | 0.907 | 0.000 | 0.011 | 0.983 |
| CCDC15 | 27 | 0.057 | 0.020 | 0.005 | 1.058 | 1.017 | 1.100 | 33.214 | 0.156 | 0.007 | 0.006 | 0.227 |
| CCDC19 | 4 | -0.139 | 0.060 | 0.021 | 0.870 | 0.773 | 0.979 | 2.482 | 0.479 | -0.016 | 0.041 | 0.731 |
| CCDC25 | 25 | -0.060 | 0.030 | 0.043 | 0.942 | 0.888 | 0.998 | 23.437 | 0.494 | -0.010 | 0.008 | 0.243 |
| CCDC3 | 23 | 0.111 | 0.023 | 0.000 | 1.118 | 1.069 | 1.168 | 21.704 | 0.478 | 0.006 | 0.006 | 0.333 |
| CCDC61 | 4 | -0.193 | 0.072 | 0.007 | 0.824 | 0.716 | 0.949 | 0.629 | 0.890 | -0.009 | 0.020 | 0.683 |
| CCDC77 | 44 | 0.061 | 0.013 | 0.000 | 1.063 | 1.036 | 1.092 | 37.618 | 0.703 | 0.006 | 0.005 | 0.203 |
| CCDC85C | 11 | 0.066 | 0.034 | 0.049 | 1.069 | 1.000 | 1.141 | 4.254 | 0.935 | -0.007 | 0.010 | 0.487 |
| CCDC9 | 5 | 0.180 | 0.066 | 0.007 | 1.197 | 1.051 | 1.363 | 2.952 | 0.566 | 0.015 | 0.029 | 0.634 |
| CCL3L3 | 14 | 0.044 | 0.013 | 0.001 | 1.045 | 1.018 | 1.073 | 11.876 | 0.538 | -0.001 | 0.014 | 0.927 |
| CCL4L1 | 20 | 0.039 | 0.014 | 0.007 | 1.039 | 1.011 | 1.069 | 26.514 | 0.116 | 0.002 | 0.012 | 0.874 |
| CCNT1 | 4 | -0.172 | 0.085 | 0.042 | 0.842 | 0.713 | 0.994 | 2.626 | 0.453 | -0.004 | 0.029 | 0.910 |
| CCNT2 | 22 | -0.067 | 0.027 | 0.011 | 0.935 | 0.887 | 0.985 | 20.241 | 0.506 | 0.003 | 0.008 | 0.673 |
| CD151 | 75 | -0.045 | 0.010 | 0.000 | 0.956 | 0.936 | 0.975 | 89.441 | 0.107 | -0.001 | 0.004 | 0.873 |
| CD177 | 31 | 0.066 | 0.025 | 0.007 | 1.068 | 1.018 | 1.121 | 20.514 | 0.902 | -0.001 | 0.009 | 0.874 |
| CD209 | 12 | -0.107 | 0.052 | 0.039 | 0.898 | 0.811 | 0.995 | 15.407 | 0.165 | 0.011 | 0.014 | 0.431 |
| CD247 | 17 | -0.082 | 0.028 | 0.003 | 0.921 | 0.871 | 0.973 | 15.979 | 0.454 | -0.002 | 0.009 | 0.840 |
| CD27-AS1 | 39 | 0.038 | 0.011 | 0.000 | 1.039 | 1.018 | 1.061 | 31.150 | 0.777 | 0.007 | 0.005 | 0.216 |
| CD300C | 58 | 0.023 | 0.010 | 0.020 | 1.023 | 1.004 | 1.044 | 55.377 | 0.536 | -0.004 | 0.005 | 0.404 |
| CD300LF | 19 | -0.064 | 0.027 | 0.019 | 0.938 | 0.889 | 0.989 | 19.814 | 0.343 | -0.008 | 0.008 | 0.328 |
| CD37 | 23 | 0.082 | 0.027 | 0.002 | 1.086 | 1.030 | 1.144 | 29.017 | 0.144 | -0.004 | 0.008 | 0.636 |
| CD3D | 4 | -0.202 | 0.076 | 0.008 | 0.817 | 0.704 | 0.949 | 1.113 | 0.774 | 0.007 | 0.016 | 0.726 |
| CD3E | 5 | -0.181 | 0.066 | 0.006 | 0.835 | 0.733 | 0.950 | 4.780 | 0.311 | -0.020 | 0.029 | 0.531 |
| CD3EAP | 3 | -0.186 | 0.080 | 0.021 | 0.830 | 0.709 | 0.972 | 2.221 | 0.329 | 0.018 | 0.042 | 0.737 |
| CD53 | 18 | -0.106 | 0.039 | 0.007 | 0.899 | 0.833 | 0.971 | 25.648 | 0.081 | 0.003 | 0.011 | 0.788 |
| CD59 | 22 | 0.045 | 0.014 | 0.001 | 1.046 | 1.018 | 1.075 | 23.632 | 0.311 | -0.007 | 0.008 | 0.434 |
| CD63 | 10 | 0.158 | 0.055 | 0.004 | 1.172 | 1.051 | 1.306 | 7.205 | 0.616 | 0.015 | 0.015 | 0.334 |
| CD79B | 5 | -0.172 | 0.072 | 0.017 | 0.842 | 0.731 | 0.969 | 0.663 | 0.956 | 0.007 | 0.016 | 0.672 |
| CD81 | 9 | 0.076 | 0.033 | 0.021 | 1.079 | 1.011 | 1.151 | 6.918 | 0.546 | -0.006 | 0.011 | 0.578 |
| CD83 | 12 | 0.088 | 0.030 | 0.004 | 1.092 | 1.029 | 1.159 | 10.379 | 0.497 | 0.020 | 0.011 | 0.106 |
| CD96 | 33 | -0.065 | 0.022 | 0.003 | 0.937 | 0.897 | 0.979 | 44.685 | 0.067 | 0.004 | 0.007 | 0.548 |
| CDADC1 | 7 | -0.163 | 0.064 | 0.011 | 0.849 | 0.748 | 0.964 | 8.114 | 0.230 | 0.021 | 0.020 | 0.338 |
| CDC42EP4 | 12 | 0.148 | 0.049 | 0.002 | 1.160 | 1.054 | 1.277 | 6.381 | 0.847 | -0.002 | 0.012 | 0.896 |
| CDH23 | 60 | -0.039 | 0.012 | 0.001 | 0.962 | 0.939 | 0.985 | 54.626 | 0.637 | -0.003 | 0.006 | 0.602 |
| CDK10 | 51 | 0.055 | 0.013 | 0.000 | 1.056 | 1.029 | 1.084 | 50.118 | 0.469 | 0.000 | 0.005 | 0.937 |
| CDKN1A | 14 | -0.112 | 0.038 | 0.003 | 0.894 | 0.830 | 0.963 | 14.693 | 0.327 | -0.016 | 0.009 | 0.093 |
| CENPW | 3 | 0.278 | 0.113 | 0.014 | 1.320 | 1.059 | 1.645 | 0.186 | 0.911 | -0.012 | 0.056 | 0.870 |
| CEP170 | 15 | 0.057 | 0.026 | 0.030 | 1.059 | 1.006 | 1.115 | 16.308 | 0.295 | 0.010 | 0.010 | 0.341 |
| CEP44 | 4 | -0.198 | 0.077 | 0.010 | 0.820 | 0.705 | 0.954 | 4.491 | 0.213 | -0.038 | 0.018 | 0.172 |
| CEP57 | 20 | -0.103 | 0.028 | 0.000 | 0.902 | 0.854 | 0.952 | 21.687 | 0.300 | 0.002 | 0.009 | 0.844 |
| CEP63 | 65 | 0.028 | 0.011 | 0.014 | 1.028 | 1.006 | 1.051 | 64.378 | 0.463 | -0.005 | 0.004 | 0.245 |
| CEP85 | 18 | 0.057 | 0.025 | 0.024 | 1.059 | 1.007 | 1.113 | 17.604 | 0.414 | 0.019 | 0.010 | 0.074 |
| CEP89 | 15 | -0.079 | 0.034 | 0.021 | 0.924 | 0.864 | 0.988 | 13.044 | 0.523 | -0.002 | 0.010 | 0.813 |
| CEP95 | 6 | -0.049 | 0.019 | 0.008 | 0.952 | 0.918 | 0.987 | 3.491 | 0.625 | 0.095 | 0.090 | 0.351 |
| CERK | 29 | 0.065 | 0.021 | 0.002 | 1.067 | 1.024 | 1.112 | 20.776 | 0.835 | -0.006 | 0.007 | 0.379 |
| CERS4 | 30 | -0.051 | 0.019 | 0.007 | 0.950 | 0.915 | 0.986 | 31.034 | 0.364 | 0.006 | 0.006 | 0.327 |
| CERS5 | 44 | -0.024 | 0.011 | 0.029 | 0.977 | 0.956 | 0.998 | 47.802 | 0.284 | 0.002 | 0.006 | 0.758 |
| CHMP3 | 15 | 0.090 | 0.036 | 0.014 | 1.094 | 1.019 | 1.175 | 19.660 | 0.141 | -0.013 | 0.010 | 0.217 |
| CHURC1 | 75 | 0.038 | 0.009 | 0.000 | 1.039 | 1.021 | 1.057 | 58.019 | 0.914 | 0.004 | 0.004 | 0.287 |
| CIRH1A | 16 | 0.117 | 0.035 | 0.001 | 1.124 | 1.049 | 1.203 | 21.694 | 0.116 | 0.012 | 0.007 | 0.091 |
| CKB | 16 | 0.092 | 0.036 | 0.011 | 1.096 | 1.021 | 1.177 | 17.877 | 0.269 | 0.014 | 0.011 | 0.201 |
| CKLF | 4 | -0.153 | 0.065 | 0.018 | 0.858 | 0.755 | 0.974 | 0.886 | 0.829 | -0.005 | 0.016 | 0.793 |
| CLCN1 | 18 | -0.083 | 0.027 | 0.002 | 0.920 | 0.873 | 0.970 | 11.585 | 0.825 | 0.002 | 0.007 | 0.727 |
| CLCN6 | 16 | 0.065 | 0.028 | 0.018 | 1.067 | 1.011 | 1.127 | 19.042 | 0.212 | -0.010 | 0.007 | 0.186 |
| CLDN15 | 12 | -0.098 | 0.038 | 0.010 | 0.907 | 0.842 | 0.977 | 4.399 | 0.957 | -0.001 | 0.007 | 0.857 |
| CLDN5 | 29 | 0.043 | 0.018 | 0.018 | 1.044 | 1.008 | 1.082 | 20.734 | 0.836 | 0.004 | 0.009 | 0.666 |
| CLDN7 | 12 | -0.113 | 0.043 | 0.010 | 0.894 | 0.821 | 0.973 | 10.198 | 0.513 | 0.011 | 0.012 | 0.410 |
| CLEC1A | 16 | 0.092 | 0.031 | 0.003 | 1.096 | 1.031 | 1.166 | 22.399 | 0.098 | 0.007 | 0.010 | 0.464 |
| CLEC4F | 75 | -0.030 | 0.009 | 0.000 | 0.970 | 0.954 | 0.987 | 52.540 | 0.972 | -0.001 | 0.004 | 0.749 |
| CLEC6A | 9 | 0.088 | 0.038 | 0.020 | 1.092 | 1.014 | 1.177 | 11.102 | 0.196 | 0.010 | 0.018 | 0.612 |
| CLK4 | 37 | -0.051 | 0.016 | 0.001 | 0.951 | 0.922 | 0.981 | 34.687 | 0.531 | -0.002 | 0.006 | 0.753 |
| CLP1 | 4 | -0.235 | 0.082 | 0.004 | 0.790 | 0.672 | 0.929 | 2.144 | 0.543 | 0.014 | 0.017 | 0.486 |
| CMTM3 | 18 | -0.120 | 0.031 | 0.000 | 0.887 | 0.835 | 0.943 | 9.315 | 0.930 | 0.002 | 0.010 | 0.821 |
| CMTM7 | 33 | 0.074 | 0.019 | 0.000 | 1.077 | 1.038 | 1.117 | 34.556 | 0.347 | 0.002 | 0.005 | 0.654 |
| CNKSR1 | 9 | 0.113 | 0.050 | 0.024 | 1.119 | 1.015 | 1.234 | 3.226 | 0.919 | 0.022 | 0.016 | 0.213 |
| CNKSR3 | 8 | -0.094 | 0.046 | 0.043 | 0.910 | 0.831 | 0.997 | 4.377 | 0.735 | -0.010 | 0.011 | 0.423 |
| CNPY2 | 6 | -0.126 | 0.055 | 0.021 | 0.882 | 0.792 | 0.981 | 3.628 | 0.604 | 0.008 | 0.014 | 0.590 |
| CNPY4 | 37 | 0.096 | 0.019 | 0.000 | 1.101 | 1.060 | 1.143 | 33.097 | 0.607 | -0.003 | 0.007 | 0.667 |
| CNTRL | 20 | 0.079 | 0.026 | 0.003 | 1.082 | 1.028 | 1.139 | 11.360 | 0.911 | 0.000 | 0.008 | 0.963 |
| COCH | 9 | -0.053 | 0.026 | 0.044 | 0.948 | 0.901 | 0.998 | 7.113 | 0.524 | -0.006 | 0.012 | 0.662 |
| COL17A1 | 5 | -0.230 | 0.058 | 0.000 | 0.794 | 0.708 | 0.891 | 1.897 | 0.755 | -0.019 | 0.014 | 0.275 |
| COL7A1 | 3 | -0.340 | 0.138 | 0.014 | 0.712 | 0.543 | 0.933 | 1.333 | 0.514 | -0.027 | 0.025 | 0.481 |
| COL9A3 | 32 | -0.029 | 0.012 | 0.014 | 0.971 | 0.949 | 0.994 | 37.235 | 0.204 | 0.001 | 0.006 | 0.924 |
| COLEC11 | 5 | 0.187 | 0.058 | 0.001 | 1.206 | 1.077 | 1.351 | 4.203 | 0.379 | 0.004 | 0.014 | 0.805 |
| COLEC12 | 22 | -0.066 | 0.027 | 0.015 | 0.936 | 0.887 | 0.987 | 22.336 | 0.380 | -0.013 | 0.007 | 0.068 |
| COMMD10 | 22 | 0.063 | 0.023 | 0.006 | 1.065 | 1.018 | 1.114 | 13.484 | 0.891 | 0.003 | 0.008 | 0.699 |
| COMMD2 | 19 | -0.077 | 0.023 | 0.001 | 0.926 | 0.886 | 0.968 | 18.756 | 0.407 | -0.003 | 0.006 | 0.673 |
| COMT | 16 | 0.060 | 0.028 | 0.030 | 1.062 | 1.006 | 1.121 | 15.064 | 0.447 | 0.013 | 0.007 | 0.084 |
| COPB1 | 55 | 0.030 | 0.015 | 0.044 | 1.031 | 1.001 | 1.062 | 55.183 | 0.430 | 0.000 | 0.005 | 0.944 |
| COQ6 | 22 | 0.094 | 0.023 | 0.000 | 1.099 | 1.050 | 1.150 | 16.338 | 0.750 | 0.002 | 0.006 | 0.728 |
| CORO1A | 5 | -0.176 | 0.066 | 0.008 | 0.838 | 0.737 | 0.954 | 0.571 | 0.966 | -0.005 | 0.023 | 0.835 |
| COX6B1 | 27 | 0.072 | 0.025 | 0.004 | 1.075 | 1.023 | 1.129 | 14.945 | 0.958 | 0.001 | 0.008 | 0.901 |
| CPT1A | 20 | -0.070 | 0.025 | 0.005 | 0.933 | 0.889 | 0.979 | 18.559 | 0.485 | 0.009 | 0.006 | 0.182 |
| CPT2 | 12 | 0.079 | 0.038 | 0.036 | 1.083 | 1.005 | 1.166 | 3.178 | 0.988 | -0.004 | 0.010 | 0.678 |
| CRAMP1L | 6 | 0.091 | 0.042 | 0.029 | 1.095 | 1.009 | 1.189 | 2.310 | 0.805 | 0.003 | 0.009 | 0.766 |
| CRELD1 | 50 | 0.038 | 0.017 | 0.021 | 1.039 | 1.006 | 1.073 | 40.325 | 0.807 | 0.006 | 0.005 | 0.263 |
| CRHR1-IT1 | 54 | 0.026 | 0.009 | 0.005 | 1.026 | 1.008 | 1.045 | 53.587 | 0.452 | -0.010 | 0.005 | 0.052 |
| CRISP3 | 7 | 0.121 | 0.052 | 0.020 | 1.128 | 1.019 | 1.249 | 4.075 | 0.666 | -0.021 | 0.015 | 0.204 |
| CRTC3 | 13 | -0.123 | 0.039 | 0.001 | 0.884 | 0.820 | 0.954 | 12.473 | 0.408 | 0.004 | 0.009 | 0.652 |
| CRY1 | 7 | -0.150 | 0.067 | 0.025 | 0.861 | 0.756 | 0.981 | 5.787 | 0.447 | -0.032 | 0.017 | 0.127 |
| CRY2 | 28 | 0.088 | 0.024 | 0.000 | 1.092 | 1.042 | 1.143 | 38.497 | 0.070 | 0.008 | 0.007 | 0.250 |
| CSDA | 22 | -0.056 | 0.024 | 0.021 | 0.946 | 0.902 | 0.992 | 15.262 | 0.810 | -0.001 | 0.008 | 0.864 |
| CSGALNACT1 | 79 | 0.025 | 0.010 | 0.014 | 1.026 | 1.005 | 1.047 | 93.529 | 0.111 | 0.004 | 0.004 | 0.392 |
| CSNK2B | 7 | 0.100 | 0.046 | 0.029 | 1.105 | 1.010 | 1.208 | 5.080 | 0.534 | -0.026 | 0.018 | 0.225 |
| CSTA | 52 | 0.057 | 0.016 | 0.000 | 1.059 | 1.027 | 1.092 | 53.182 | 0.390 | -0.001 | 0.005 | 0.848 |
| CSTB | 74 | 0.022 | 0.010 | 0.035 | 1.022 | 1.002 | 1.043 | 57.859 | 0.902 | -0.005 | 0.004 | 0.260 |
| CTA-126B4.7 | 18 | 0.023 | 0.011 | 0.035 | 1.024 | 1.002 | 1.046 | 15.776 | 0.540 | 0.002 | 0.007 | 0.795 |
| CTA-29F11.1 | 20 | 0.026 | 0.010 | 0.009 | 1.026 | 1.007 | 1.047 | 15.913 | 0.663 | 0.006 | 0.010 | 0.561 |
| CTB-114C7.4 | 13 | 0.078 | 0.028 | 0.006 | 1.081 | 1.023 | 1.142 | 8.387 | 0.754 | 0.000 | 0.008 | 0.980 |
| CTB-118N6.3 | 15 | -0.057 | 0.029 | 0.049 | 0.945 | 0.893 | 1.000 | 20.189 | 0.124 | 0.004 | 0.014 | 0.781 |
| CTB-167B5.2 | 24 | -0.041 | 0.010 | 0.000 | 0.960 | 0.941 | 0.979 | 19.837 | 0.652 | 0.012 | 0.006 | 0.067 |
| CTB-27N1.1 | 21 | 0.025 | 0.012 | 0.046 | 1.025 | 1.000 | 1.051 | 19.264 | 0.505 | -0.012 | 0.009 | 0.175 |
| CTB-37A13.1 | 7 | -0.061 | 0.019 | 0.001 | 0.941 | 0.907 | 0.976 | 1.616 | 0.951 | 0.000 | 0.014 | 0.978 |
| CTB-50L17.9 | 12 | -0.042 | 0.017 | 0.013 | 0.959 | 0.928 | 0.991 | 14.536 | 0.205 | -0.005 | 0.009 | 0.630 |
| CTC-428G20.3 | 8 | -0.135 | 0.036 | 0.000 | 0.874 | 0.814 | 0.938 | 7.072 | 0.421 | -0.028 | 0.013 | 0.082 |
| CTC-444N24.11 | 14 | 0.068 | 0.018 | 0.000 | 1.070 | 1.033 | 1.108 | 4.140 | 0.990 | 0.000 | 0.010 | 0.970 |
| CTC-510F12.4 | 31 | -0.023 | 0.008 | 0.003 | 0.977 | 0.962 | 0.992 | 33.988 | 0.281 | -0.005 | 0.007 | 0.450 |
| CTC-548K16.2 | 12 | -0.059 | 0.024 | 0.016 | 0.943 | 0.899 | 0.989 | 12.029 | 0.361 | 0.011 | 0.014 | 0.481 |
| CTD-2007H13.3 | 11 | 0.074 | 0.018 | 0.000 | 1.077 | 1.041 | 1.115 | 3.713 | 0.959 | 0.013 | 0.011 | 0.235 |
| CTD-2017D11.1 | 28 | 0.023 | 0.007 | 0.003 | 1.023 | 1.008 | 1.038 | 19.968 | 0.832 | 0.001 | 0.008 | 0.870 |
| CTD-2162K18.4 | 4 | -0.160 | 0.068 | 0.018 | 0.852 | 0.747 | 0.973 | 3.323 | 0.344 | -0.006 | 0.039 | 0.889 |
| CTD-2245F17.3 | 14 | 0.033 | 0.015 | 0.026 | 1.034 | 1.004 | 1.065 | 6.249 | 0.937 | -0.002 | 0.009 | 0.796 |
| CTD-2246P4.1 | 8 | 0.045 | 0.014 | 0.001 | 1.046 | 1.018 | 1.076 | 4.030 | 0.776 | 0.011 | 0.011 | 0.353 |
| CTD-2248H3.1 | 14 | 0.035 | 0.014 | 0.011 | 1.035 | 1.008 | 1.064 | 10.348 | 0.665 | 0.004 | 0.007 | 0.529 |
| CTD-2260A17.2 | 3 | 0.101 | 0.043 | 0.018 | 1.107 | 1.017 | 1.204 | 2.204 | 0.332 | -0.007 | 0.031 | 0.864 |
| CTD-2313J17.1 | 4 | -0.064 | 0.031 | 0.042 | 0.938 | 0.882 | 0.998 | 1.536 | 0.674 | 0.023 | 0.021 | 0.381 |
| CTD-2331H12.5 | 9 | 0.051 | 0.021 | 0.018 | 1.052 | 1.009 | 1.097 | 6.070 | 0.639 | -0.021 | 0.017 | 0.255 |
| CTD-2337J16.1 | 7 | 0.075 | 0.030 | 0.012 | 1.078 | 1.016 | 1.144 | 9.999 | 0.125 | 0.014 | 0.021 | 0.530 |
| CTD-2353F22.1 | 38 | 0.018 | 0.007 | 0.010 | 1.019 | 1.004 | 1.033 | 35.004 | 0.563 | 0.012 | 0.007 | 0.097 |
| CTD-2619J13.19 | 3 | -0.071 | 0.035 | 0.045 | 0.932 | 0.869 | 0.998 | 1.620 | 0.445 | -0.050 | 0.054 | 0.528 |
| CTD-3023J11.2 | 15 | 0.047 | 0.019 | 0.013 | 1.048 | 1.010 | 1.088 | 5.540 | 0.977 | 0.001 | 0.010 | 0.940 |
| CTD-3074O7.12 | 7 | 0.045 | 0.022 | 0.043 | 1.046 | 1.002 | 1.093 | 4.380 | 0.625 | -0.002 | 0.013 | 0.863 |
| CTD-3088G3.4 | 8 | 0.081 | 0.026 | 0.002 | 1.085 | 1.031 | 1.140 | 3.927 | 0.788 | -0.008 | 0.014 | 0.567 |
| CTD-3162L10.1 | 17 | -0.036 | 0.015 | 0.017 | 0.964 | 0.936 | 0.994 | 11.362 | 0.787 | 0.000 | 0.011 | 0.977 |
| CTD-3187F8.15 | 4 | -0.080 | 0.040 | 0.048 | 0.923 | 0.853 | 0.999 | 4.168 | 0.244 | -0.067 | 0.063 | 0.395 |
| CTD-3199J23.6 | 5 | -0.064 | 0.026 | 0.014 | 0.938 | 0.892 | 0.987 | 1.324 | 0.857 | 0.003 | 0.020 | 0.888 |
| CTNNBIP1 | 8 | -0.122 | 0.049 | 0.013 | 0.885 | 0.804 | 0.975 | 10.976 | 0.140 | 0.010 | 0.019 | 0.629 |
| CTNNBL1 | 5 | 0.132 | 0.065 | 0.043 | 1.142 | 1.004 | 1.298 | 2.023 | 0.732 | 0.011 | 0.019 | 0.600 |
| CTR9 | 3 | -0.249 | 0.069 | 0.000 | 0.780 | 0.681 | 0.893 | 1.544 | 0.462 | 0.005 | 0.052 | 0.944 |
| CTSF | 39 | 0.035 | 0.017 | 0.043 | 1.035 | 1.001 | 1.071 | 51.148 | 0.075 | 0.003 | 0.008 | 0.683 |
| CTSG | 31 | 0.067 | 0.027 | 0.012 | 1.069 | 1.015 | 1.126 | 37.250 | 0.170 | -0.008 | 0.008 | 0.317 |
| CUEDC1 | 17 | -0.076 | 0.035 | 0.031 | 0.927 | 0.865 | 0.993 | 9.559 | 0.889 | -0.010 | 0.010 | 0.343 |
| CUL3 | 4 | 0.154 | 0.067 | 0.021 | 1.167 | 1.024 | 1.330 | 1.847 | 0.605 | -0.017 | 0.020 | 0.485 |
| CUL7 | 9 | -0.069 | 0.033 | 0.038 | 0.934 | 0.875 | 0.996 | 6.893 | 0.548 | -0.011 | 0.010 | 0.313 |
| CUL9 | 4 | -0.157 | 0.080 | 0.049 | 0.855 | 0.731 | 1.000 | 3.121 | 0.373 | -0.031 | 0.043 | 0.546 |
| CWC25 | 14 | -0.078 | 0.032 | 0.015 | 0.925 | 0.868 | 0.985 | 10.007 | 0.693 | -0.005 | 0.007 | 0.549 |
| CWF19L2 | 46 | 0.078 | 0.014 | 0.000 | 1.082 | 1.052 | 1.112 | 45.453 | 0.453 | 0.007 | 0.005 | 0.175 |
| CXCL16 | 37 | -0.060 | 0.016 | 0.000 | 0.941 | 0.912 | 0.972 | 34.949 | 0.518 | 0.002 | 0.005 | 0.723 |
| CYB5A | 16 | 0.087 | 0.033 | 0.008 | 1.091 | 1.023 | 1.162 | 18.327 | 0.246 | -0.016 | 0.008 | 0.065 |
| CYB5D1 | 30 | 0.061 | 0.023 | 0.008 | 1.063 | 1.016 | 1.113 | 20.638 | 0.872 | 0.001 | 0.005 | 0.835 |
| CYP2B7P1 | 15 | -0.097 | 0.032 | 0.002 | 0.907 | 0.852 | 0.966 | 21.386 | 0.092 | -0.010 | 0.009 | 0.294 |
| CYP2F1P | 3 | 0.209 | 0.035 | 0.000 | 1.232 | 1.152 | 1.319 | 0.197 | 0.906 | 0.003 | 0.018 | 0.910 |
| CYP2S1 | 44 | -0.073 | 0.016 | 0.000 | 0.930 | 0.901 | 0.959 | 41.032 | 0.557 | 0.000 | 0.004 | 0.989 |
| CYP2T2P | 42 | -0.026 | 0.008 | 0.001 | 0.974 | 0.959 | 0.989 | 51.764 | 0.121 | 0.003 | 0.006 | 0.618 |
| CYP51A1 | 13 | 0.060 | 0.022 | 0.007 | 1.062 | 1.017 | 1.109 | 8.255 | 0.765 | -0.019 | 0.018 | 0.307 |
| DAP | 33 | -0.038 | 0.016 | 0.015 | 0.963 | 0.934 | 0.993 | 26.556 | 0.739 | -0.008 | 0.005 | 0.145 |
| DAPK1 | 53 | 0.042 | 0.012 | 0.000 | 1.043 | 1.019 | 1.068 | 33.354 | 0.979 | -0.003 | 0.005 | 0.505 |
| DAPK2 | 11 | 0.138 | 0.043 | 0.001 | 1.148 | 1.054 | 1.250 | 5.973 | 0.818 | -0.007 | 0.016 | 0.687 |
| DARC | 15 | -0.076 | 0.033 | 0.022 | 0.927 | 0.868 | 0.989 | 18.032 | 0.205 | -0.025 | 0.012 | 0.059 |
| DAZAP2 | 13 | -0.085 | 0.040 | 0.033 | 0.919 | 0.850 | 0.993 | 10.330 | 0.587 | -0.015 | 0.012 | 0.227 |
| DBNDD1 | 25 | -0.061 | 0.017 | 0.000 | 0.941 | 0.911 | 0.972 | 28.211 | 0.251 | -0.001 | 0.006 | 0.873 |
| DCAF4 | 70 | 0.032 | 0.011 | 0.005 | 1.033 | 1.010 | 1.056 | 88.771 | 0.055 | -0.002 | 0.005 | 0.772 |
| DCBLD1 | 27 | -0.111 | 0.020 | 0.000 | 0.895 | 0.860 | 0.932 | 17.837 | 0.882 | 0.004 | 0.007 | 0.520 |
| DCHS1 | 30 | -0.055 | 0.022 | 0.013 | 0.946 | 0.906 | 0.988 | 32.260 | 0.309 | 0.002 | 0.007 | 0.811 |
| DCP2 | 17 | -0.136 | 0.030 | 0.000 | 0.873 | 0.823 | 0.925 | 13.631 | 0.626 | -0.016 | 0.010 | 0.137 |
| DDHD2 | 7 | -0.107 | 0.051 | 0.035 | 0.899 | 0.814 | 0.993 | 7.170 | 0.305 | -0.023 | 0.015 | 0.176 |
| DDIT4L | 4 | 0.189 | 0.093 | 0.042 | 1.208 | 1.007 | 1.450 | 0.830 | 0.842 | -0.006 | 0.023 | 0.807 |
| DDX10 | 5 | -0.123 | 0.057 | 0.032 | 0.884 | 0.791 | 0.989 | 4.567 | 0.335 | -0.017 | 0.029 | 0.603 |
| DDX10P1 | 17 | -0.048 | 0.014 | 0.001 | 0.953 | 0.928 | 0.979 | 16.441 | 0.423 | -0.014 | 0.008 | 0.106 |
| DDX11 | 104 | -0.024 | 0.008 | 0.003 | 0.976 | 0.960 | 0.992 | 117.004 | 0.163 | 0.001 | 0.003 | 0.669 |
| DDX23 | 5 | -0.087 | 0.040 | 0.028 | 0.916 | 0.848 | 0.990 | 1.290 | 0.863 | -0.024 | 0.026 | 0.423 |
| DDX31 | 23 | 0.059 | 0.024 | 0.013 | 1.060 | 1.012 | 1.111 | 16.128 | 0.809 | -0.007 | 0.007 | 0.301 |
| DDX43 | 12 | -0.106 | 0.051 | 0.040 | 0.900 | 0.814 | 0.995 | 9.089 | 0.614 | -0.003 | 0.012 | 0.842 |
| DDX49 | 3 | -0.140 | 0.070 | 0.046 | 0.869 | 0.758 | 0.997 | 0.103 | 0.950 | 0.006 | 0.027 | 0.855 |
| DDX5 | 15 | 0.046 | 0.016 | 0.006 | 1.047 | 1.013 | 1.081 | 13.550 | 0.484 | 0.006 | 0.013 | 0.619 |
| DDX52 | 20 | -0.043 | 0.022 | 0.046 | 0.958 | 0.918 | 0.999 | 10.749 | 0.932 | -0.005 | 0.008 | 0.559 |
| DECR2 | 41 | 0.057 | 0.017 | 0.001 | 1.059 | 1.024 | 1.095 | 52.670 | 0.087 | 0.003 | 0.006 | 0.615 |
| DENND6A | 9 | 0.098 | 0.044 | 0.025 | 1.103 | 1.012 | 1.202 | 7.825 | 0.451 | 0.006 | 0.013 | 0.635 |
| DENND6B | 16 | 0.066 | 0.024 | 0.007 | 1.068 | 1.018 | 1.120 | 16.809 | 0.330 | 0.010 | 0.009 | 0.318 |
| DEPDC7 | 12 | 0.099 | 0.040 | 0.014 | 1.105 | 1.021 | 1.196 | 13.712 | 0.249 | 0.011 | 0.013 | 0.437 |
| DFNB31 | 22 | 0.084 | 0.031 | 0.006 | 1.088 | 1.025 | 1.155 | 14.999 | 0.823 | 0.003 | 0.008 | 0.734 |
| DGAT1 | 25 | -0.032 | 0.013 | 0.014 | 0.968 | 0.943 | 0.993 | 20.146 | 0.688 | -0.004 | 0.008 | 0.597 |
| DGAT2 | 7 | -0.206 | 0.054 | 0.000 | 0.814 | 0.732 | 0.905 | 4.724 | 0.580 | -0.008 | 0.013 | 0.563 |
| DGCR6 | 9 | -0.057 | 0.026 | 0.031 | 0.945 | 0.897 | 0.995 | 1.852 | 0.985 | -0.006 | 0.011 | 0.602 |
| DHFR | 50 | -0.015 | 0.008 | 0.047 | 0.985 | 0.970 | 1.000 | 48.923 | 0.476 | 0.000 | 0.006 | 0.984 |
| DHX33 | 5 | 0.278 | 0.068 | 0.000 | 1.320 | 1.155 | 1.510 | 0.536 | 0.970 | -0.005 | 0.019 | 0.819 |
| DHX34 | 26 | 0.062 | 0.024 | 0.009 | 1.064 | 1.016 | 1.115 | 17.974 | 0.843 | 0.000 | 0.008 | 0.984 |
| DHX36 | 25 | 0.051 | 0.022 | 0.020 | 1.052 | 1.008 | 1.098 | 21.305 | 0.621 | 0.003 | 0.007 | 0.602 |
| DICER1 | 16 | 0.163 | 0.035 | 0.000 | 1.177 | 1.100 | 1.260 | 11.373 | 0.726 | -0.002 | 0.010 | 0.846 |
| DIS3 | 3 | 0.259 | 0.105 | 0.013 | 1.296 | 1.056 | 1.591 | 0.822 | 0.663 | 0.000 | 0.029 | 0.989 |
| DKFZP761J1410 | 21 | 0.062 | 0.023 | 0.007 | 1.064 | 1.017 | 1.113 | 9.750 | 0.972 | 0.003 | 0.007 | 0.713 |
| DLEU7 | 7 | -0.234 | 0.091 | 0.010 | 0.792 | 0.663 | 0.945 | 9.711 | 0.137 | -0.020 | 0.025 | 0.474 |
| DMXL1 | 3 | -0.262 | 0.123 | 0.033 | 0.769 | 0.604 | 0.980 | 0.764 | 0.683 | -0.088 | 0.102 | 0.547 |
| DMXL2 | 20 | 0.064 | 0.030 | 0.032 | 1.066 | 1.005 | 1.130 | 18.367 | 0.498 | 0.001 | 0.007 | 0.920 |
| DNAJB12 | 30 | -0.062 | 0.023 | 0.008 | 0.940 | 0.897 | 0.984 | 22.523 | 0.798 | -0.002 | 0.008 | 0.776 |
| DNAJC19P5 | 9 | 0.078 | 0.019 | 0.000 | 1.081 | 1.042 | 1.122 | 6.315 | 0.612 | 0.001 | 0.012 | 0.918 |
| DNASE1L3 | 20 | -0.042 | 0.020 | 0.038 | 0.959 | 0.922 | 0.998 | 12.413 | 0.867 | -0.007 | 0.009 | 0.444 |
| DNHD1 | 19 | -0.083 | 0.028 | 0.003 | 0.920 | 0.871 | 0.972 | 17.861 | 0.465 | 0.002 | 0.010 | 0.837 |
| DNPH1 | 27 | -0.049 | 0.020 | 0.014 | 0.952 | 0.915 | 0.990 | 23.246 | 0.619 | 0.001 | 0.006 | 0.889 |
| DOCK10 | 30 | -0.065 | 0.018 | 0.000 | 0.937 | 0.905 | 0.970 | 28.902 | 0.470 | -0.006 | 0.006 | 0.312 |
| DOK2 | 25 | 0.043 | 0.019 | 0.023 | 1.044 | 1.006 | 1.084 | 26.267 | 0.340 | 0.013 | 0.009 | 0.169 |
| DOK7 | 15 | 0.059 | 0.027 | 0.028 | 1.061 | 1.006 | 1.119 | 16.743 | 0.270 | 0.008 | 0.012 | 0.535 |
| DOPEY2 | 11 | 0.091 | 0.037 | 0.015 | 1.095 | 1.018 | 1.178 | 8.914 | 0.540 | -0.001 | 0.010 | 0.886 |
| DPEP2 | 18 | -0.122 | 0.028 | 0.000 | 0.885 | 0.837 | 0.936 | 17.755 | 0.404 | -0.010 | 0.011 | 0.366 |
| DPEP3 | 20 | 0.051 | 0.024 | 0.030 | 1.052 | 1.005 | 1.102 | 15.573 | 0.686 | 0.000 | 0.008 | 0.957 |
| DRAM1 | 42 | 0.050 | 0.015 | 0.001 | 1.051 | 1.021 | 1.082 | 37.366 | 0.633 | -0.002 | 0.005 | 0.706 |
| DSCR3 | 15 | 0.131 | 0.038 | 0.001 | 1.139 | 1.057 | 1.229 | 14.502 | 0.413 | -0.010 | 0.015 | 0.520 |
| DSE | 70 | 0.042 | 0.012 | 0.000 | 1.043 | 1.020 | 1.067 | 64.509 | 0.631 | 0.005 | 0.004 | 0.244 |
| DSTYK | 63 | 0.022 | 0.011 | 0.049 | 1.022 | 1.000 | 1.044 | 59.095 | 0.581 | 0.001 | 0.005 | 0.885 |
| DTD2 | 5 | -0.145 | 0.065 | 0.027 | 0.865 | 0.761 | 0.983 | 3.369 | 0.498 | -0.032 | 0.025 | 0.301 |
| DTWD2 | 11 | -0.122 | 0.052 | 0.020 | 0.885 | 0.799 | 0.981 | 11.149 | 0.346 | -0.004 | 0.016 | 0.796 |
| DTX3L | 10 | 0.087 | 0.044 | 0.048 | 1.091 | 1.001 | 1.189 | 4.410 | 0.882 | 0.010 | 0.011 | 0.396 |
| DUS2L | 34 | -0.053 | 0.014 | 0.000 | 0.948 | 0.922 | 0.976 | 28.812 | 0.676 | -0.005 | 0.008 | 0.562 |
| DUS3L | 16 | 0.029 | 0.014 | 0.037 | 1.030 | 1.002 | 1.059 | 12.352 | 0.652 | -0.006 | 0.008 | 0.457 |
| DUSP14 | 44 | -0.033 | 0.012 | 0.004 | 0.967 | 0.945 | 0.990 | 28.441 | 0.957 | -0.004 | 0.005 | 0.487 |
| DUSP23 | 12 | 0.093 | 0.039 | 0.018 | 1.097 | 1.016 | 1.185 | 14.487 | 0.207 | 0.015 | 0.011 | 0.198 |
| DUSP3 | 14 | -0.073 | 0.029 | 0.012 | 0.930 | 0.879 | 0.984 | 6.622 | 0.921 | -0.001 | 0.007 | 0.864 |
| DUSP8 | 6 | 0.161 | 0.055 | 0.004 | 1.174 | 1.053 | 1.309 | 2.635 | 0.756 | -0.005 | 0.014 | 0.737 |
| DYNC2LI1 | 7 | -0.120 | 0.058 | 0.038 | 0.887 | 0.792 | 0.993 | 1.370 | 0.968 | -0.002 | 0.013 | 0.857 |
| DZIP3 | 32 | 0.035 | 0.017 | 0.042 | 1.036 | 1.001 | 1.072 | 27.117 | 0.666 | 0.004 | 0.006 | 0.553 |
| EBAG9 | 17 | -0.086 | 0.042 | 0.042 | 0.918 | 0.844 | 0.997 | 17.969 | 0.326 | -0.006 | 0.009 | 0.542 |
| ECHDC2 | 49 | 0.031 | 0.013 | 0.019 | 1.032 | 1.005 | 1.059 | 35.916 | 0.901 | 0.009 | 0.006 | 0.121 |
| EDAR | 5 | 0.214 | 0.081 | 0.008 | 1.238 | 1.057 | 1.451 | 1.540 | 0.820 | -0.012 | 0.021 | 0.613 |
| EDARADD | 20 | 0.096 | 0.034 | 0.005 | 1.101 | 1.030 | 1.176 | 24.326 | 0.184 | 0.003 | 0.008 | 0.676 |
| EDEM2 | 21 | 0.099 | 0.025 | 0.000 | 1.104 | 1.052 | 1.159 | 13.283 | 0.865 | 0.001 | 0.009 | 0.881 |
| EDEM3 | 12 | -0.101 | 0.051 | 0.045 | 0.904 | 0.818 | 0.998 | 8.919 | 0.629 | -0.010 | 0.012 | 0.433 |
| EEA1 | 5 | 0.195 | 0.078 | 0.012 | 1.215 | 1.044 | 1.415 | 2.685 | 0.612 | 0.018 | 0.023 | 0.492 |
| EEF1A1 | 43 | 0.031 | 0.013 | 0.015 | 1.032 | 1.006 | 1.058 | 36.684 | 0.703 | -0.008 | 0.006 | 0.230 |
| EFCAB4A | 45 | -0.081 | 0.017 | 0.000 | 0.922 | 0.891 | 0.954 | 58.525 | 0.070 | -0.005 | 0.006 | 0.439 |
| EFNA1 | 3 | 0.327 | 0.150 | 0.029 | 1.387 | 1.034 | 1.860 | 2.546 | 0.280 | 0.039 | 0.032 | 0.436 |
| EFTUD2 | 37 | 0.081 | 0.022 | 0.000 | 1.084 | 1.039 | 1.131 | 37.267 | 0.411 | 0.000 | 0.006 | 0.948 |
| EIF2S2P3 | 10 | -0.064 | 0.023 | 0.006 | 0.938 | 0.897 | 0.982 | 14.008 | 0.122 | -0.019 | 0.020 | 0.379 |
| EIF3F | 12 | -0.104 | 0.043 | 0.017 | 0.902 | 0.828 | 0.982 | 12.870 | 0.302 | -0.004 | 0.012 | 0.764 |
| EIF3K | 7 | -0.093 | 0.036 | 0.009 | 0.911 | 0.850 | 0.977 | 2.661 | 0.850 | 0.011 | 0.010 | 0.320 |
| EIF4B | 10 | 0.054 | 0.022 | 0.016 | 1.055 | 1.010 | 1.103 | 4.172 | 0.900 | -0.013 | 0.010 | 0.240 |
| EIF4G2 | 3 | -0.301 | 0.132 | 0.023 | 0.740 | 0.571 | 0.959 | 3.796 | 0.150 | 0.042 | 0.223 | 0.882 |
| EIF5 | 49 | -0.077 | 0.016 | 0.000 | 0.926 | 0.898 | 0.955 | 49.509 | 0.413 | 0.004 | 0.006 | 0.476 |
| EIF5A | 11 | 0.069 | 0.029 | 0.015 | 1.072 | 1.013 | 1.133 | 7.496 | 0.678 | 0.010 | 0.010 | 0.348 |
| ELAC2 | 25 | 0.067 | 0.022 | 0.002 | 1.070 | 1.024 | 1.117 | 15.564 | 0.903 | -0.006 | 0.007 | 0.387 |
| ELF3 | 5 | -0.115 | 0.056 | 0.040 | 0.891 | 0.799 | 0.995 | 1.766 | 0.779 | -0.016 | 0.015 | 0.345 |
| ELK4 | 5 | -0.186 | 0.091 | 0.041 | 0.830 | 0.695 | 0.992 | 3.848 | 0.427 | 0.000 | 0.026 | 0.996 |
| ELMO3 | 6 | -0.115 | 0.048 | 0.016 | 0.891 | 0.811 | 0.979 | 9.838 | 0.080 | -0.031 | 0.028 | 0.334 |
| ELP3 | 51 | -0.028 | 0.014 | 0.044 | 0.973 | 0.947 | 0.999 | 40.035 | 0.842 | 0.000 | 0.005 | 0.994 |
| EMBP1 | 5 | -0.078 | 0.034 | 0.020 | 0.925 | 0.865 | 0.988 | 0.989 | 0.912 | 0.008 | 0.019 | 0.717 |
| EME2 | 10 | -0.190 | 0.039 | 0.000 | 0.827 | 0.766 | 0.893 | 4.847 | 0.847 | -0.005 | 0.013 | 0.696 |
| EMR4P | 17 | 0.051 | 0.024 | 0.034 | 1.052 | 1.004 | 1.103 | 13.537 | 0.633 | 0.006 | 0.006 | 0.395 |
| ENO3 | 9 | -0.110 | 0.055 | 0.045 | 0.896 | 0.805 | 0.998 | 6.047 | 0.642 | -0.027 | 0.015 | 0.114 |
| ENPP4 | 32 | 0.037 | 0.018 | 0.042 | 1.038 | 1.001 | 1.075 | 26.239 | 0.710 | 0.000 | 0.006 | 0.977 |
| ENY2 | 5 | 0.210 | 0.064 | 0.001 | 1.233 | 1.088 | 1.398 | 4.283 | 0.369 | 0.026 | 0.017 | 0.228 |
| EPHA4 | 42 | 0.049 | 0.018 | 0.007 | 1.050 | 1.013 | 1.088 | 35.707 | 0.704 | -0.002 | 0.006 | 0.760 |
| EPHB4 | 64 | -0.047 | 0.012 | 0.000 | 0.954 | 0.932 | 0.977 | 72.898 | 0.185 | 0.001 | 0.005 | 0.886 |
| EPM2A | 18 | -0.086 | 0.035 | 0.015 | 0.918 | 0.857 | 0.983 | 18.882 | 0.335 | -0.003 | 0.010 | 0.769 |
| EPOR | 14 | 0.096 | 0.031 | 0.002 | 1.101 | 1.036 | 1.169 | 6.250 | 0.937 | 0.010 | 0.009 | 0.288 |
| ERAP2 | 99 | -0.023 | 0.006 | 0.000 | 0.977 | 0.966 | 0.989 | 108.837 | 0.213 | 0.000 | 0.003 | 0.942 |
| ERCC1 | 14 | -0.107 | 0.025 | 0.000 | 0.899 | 0.856 | 0.944 | 14.695 | 0.327 | -0.002 | 0.013 | 0.898 |
| ERCC6L2 | 5 | 0.130 | 0.056 | 0.021 | 1.139 | 1.020 | 1.272 | 3.441 | 0.487 | -0.020 | 0.015 | 0.285 |
| EREG | 8 | 0.127 | 0.062 | 0.039 | 1.136 | 1.006 | 1.282 | 11.566 | 0.116 | 0.003 | 0.016 | 0.853 |
| ERI1 | 6 | 0.223 | 0.094 | 0.018 | 1.249 | 1.039 | 1.502 | 7.319 | 0.198 | 0.003 | 0.033 | 0.925 |
| ERI2 | 4 | -0.216 | 0.089 | 0.016 | 0.806 | 0.676 | 0.960 | 0.613 | 0.893 | -0.018 | 0.025 | 0.545 |
| ERLEC1 | 3 | -0.249 | 0.111 | 0.025 | 0.779 | 0.627 | 0.969 | 0.408 | 0.815 | 0.010 | 0.026 | 0.771 |
| ERMP1 | 43 | -0.037 | 0.016 | 0.017 | 0.963 | 0.934 | 0.993 | 56.535 | 0.066 | 0.007 | 0.005 | 0.176 |
| ERO1L | 80 | -0.033 | 0.010 | 0.001 | 0.967 | 0.948 | 0.987 | 79.326 | 0.469 | 0.006 | 0.004 | 0.105 |
| ESD | 21 | -0.055 | 0.027 | 0.038 | 0.946 | 0.898 | 0.997 | 12.625 | 0.893 | -0.001 | 0.007 | 0.861 |
| EVI2A | 33 | -0.047 | 0.021 | 0.026 | 0.955 | 0.916 | 0.995 | 22.410 | 0.896 | 0.006 | 0.007 | 0.354 |
| EXOC3 | 57 | -0.023 | 0.010 | 0.021 | 0.977 | 0.958 | 0.996 | 44.701 | 0.861 | 0.000 | 0.006 | 0.984 |
| EXOSC3 | 9 | -0.080 | 0.040 | 0.046 | 0.923 | 0.852 | 0.999 | 6.752 | 0.564 | -0.007 | 0.013 | 0.602 |
| EXOSC7 | 10 | 0.061 | 0.030 | 0.043 | 1.063 | 1.002 | 1.127 | 11.924 | 0.218 | 0.010 | 0.012 | 0.439 |
| F2RL1 | 54 | 0.028 | 0.010 | 0.004 | 1.028 | 1.009 | 1.048 | 58.765 | 0.273 | 0.005 | 0.005 | 0.353 |
| FAAH | 31 | 0.057 | 0.020 | 0.004 | 1.059 | 1.018 | 1.101 | 26.534 | 0.648 | 0.002 | 0.006 | 0.764 |
| FADS1 | 38 | -0.044 | 0.022 | 0.039 | 0.957 | 0.917 | 0.998 | 48.205 | 0.103 | 0.011 | 0.006 | 0.078 |
| FADS2 | 53 | -0.033 | 0.011 | 0.003 | 0.967 | 0.946 | 0.989 | 50.610 | 0.529 | 0.003 | 0.004 | 0.504 |
| FAHD1 | 20 | -0.114 | 0.021 | 0.000 | 0.892 | 0.856 | 0.930 | 19.504 | 0.425 | -0.011 | 0.009 | 0.223 |
| FAM105A | 8 | -0.079 | 0.039 | 0.042 | 0.924 | 0.856 | 0.997 | 4.328 | 0.741 | 0.000 | 0.010 | 1.000 |
| FAM105B | 4 | -0.110 | 0.046 | 0.018 | 0.896 | 0.818 | 0.981 | 1.031 | 0.794 | 0.004 | 0.015 | 0.801 |
| FAM117B | 67 | 0.020 | 0.010 | 0.034 | 1.020 | 1.002 | 1.040 | 81.432 | 0.095 | 0.006 | 0.005 | 0.266 |
| FAM118B | 42 | 0.041 | 0.018 | 0.020 | 1.042 | 1.007 | 1.079 | 40.831 | 0.478 | 0.003 | 0.005 | 0.531 |
| FAM126A | 10 | 0.125 | 0.038 | 0.001 | 1.133 | 1.053 | 1.220 | 7.518 | 0.583 | 0.006 | 0.007 | 0.428 |
| FAM131B | 7 | -0.135 | 0.049 | 0.006 | 0.874 | 0.795 | 0.961 | 4.764 | 0.574 | -0.024 | 0.014 | 0.137 |
| FAM135A | 13 | 0.109 | 0.039 | 0.005 | 1.115 | 1.033 | 1.203 | 9.390 | 0.669 | 0.011 | 0.009 | 0.244 |
| FAM13A | 26 | -0.160 | 0.022 | 0.000 | 0.852 | 0.816 | 0.890 | 31.646 | 0.169 | 0.016 | 0.009 | 0.098 |
| FAM153A | 31 | -0.023 | 0.012 | 0.049 | 0.977 | 0.955 | 1.000 | 38.331 | 0.141 | 0.001 | 0.009 | 0.880 |
| FAM161B | 5 | 0.189 | 0.056 | 0.001 | 1.209 | 1.083 | 1.348 | 1.778 | 0.777 | -0.008 | 0.016 | 0.628 |
| FAM170B | 5 | -0.142 | 0.068 | 0.037 | 0.867 | 0.759 | 0.992 | 2.102 | 0.717 | 0.020 | 0.015 | 0.288 |
| FAM172A | 8 | -0.237 | 0.062 | 0.000 | 0.789 | 0.698 | 0.891 | 3.925 | 0.788 | 0.003 | 0.012 | 0.826 |
| FAM174B | 5 | 0.090 | 0.041 | 0.030 | 1.094 | 1.009 | 1.186 | 0.471 | 0.976 | 0.000 | 0.016 | 0.982 |
| FAM177A1 | 25 | -0.054 | 0.027 | 0.049 | 0.948 | 0.898 | 1.000 | 18.495 | 0.778 | 0.001 | 0.007 | 0.937 |
| FAM178A | 12 | -0.104 | 0.039 | 0.008 | 0.901 | 0.834 | 0.973 | 7.380 | 0.768 | 0.004 | 0.016 | 0.812 |
| FAM182B | 12 | 0.085 | 0.026 | 0.001 | 1.088 | 1.035 | 1.145 | 18.662 | 0.067 | 0.017 | 0.016 | 0.311 |
| FAM184B | 4 | 0.111 | 0.051 | 0.029 | 1.117 | 1.012 | 1.234 | 1.074 | 0.783 | -0.004 | 0.016 | 0.815 |
| FAM188A | 10 | -0.140 | 0.046 | 0.003 | 0.870 | 0.794 | 0.952 | 5.825 | 0.757 | 0.015 | 0.016 | 0.378 |
| FAM206A | 14 | 0.058 | 0.020 | 0.004 | 1.060 | 1.019 | 1.102 | 8.518 | 0.808 | 0.009 | 0.010 | 0.381 |
| FAM20A | 3 | 0.210 | 0.071 | 0.003 | 1.234 | 1.074 | 1.417 | 1.254 | 0.534 | 0.016 | 0.024 | 0.624 |
| FAM219B | 13 | -0.063 | 0.032 | 0.048 | 0.939 | 0.881 | 0.999 | 12.661 | 0.394 | -0.011 | 0.010 | 0.335 |
| FAM21D | 5 | 0.065 | 0.031 | 0.040 | 1.067 | 1.003 | 1.134 | 1.851 | 0.763 | -0.018 | 0.028 | 0.564 |
| FAM222B | 4 | 0.170 | 0.070 | 0.016 | 1.185 | 1.033 | 1.360 | 0.737 | 0.864 | -0.002 | 0.019 | 0.935 |
| FAM26F | 64 | -0.033 | 0.009 | 0.000 | 0.968 | 0.951 | 0.986 | 58.938 | 0.622 | -0.002 | 0.004 | 0.537 |
| FAM63B | 18 | -0.080 | 0.038 | 0.034 | 0.923 | 0.857 | 0.994 | 19.465 | 0.302 | 0.011 | 0.009 | 0.235 |
| FAM65A | 6 | 0.145 | 0.055 | 0.009 | 1.156 | 1.037 | 1.289 | 5.896 | 0.317 | 0.018 | 0.012 | 0.226 |
| FAM71F2 | 11 | -0.052 | 0.024 | 0.033 | 0.949 | 0.905 | 0.996 | 9.948 | 0.445 | -0.018 | 0.011 | 0.158 |
| FAM76B | 39 | 0.069 | 0.017 | 0.000 | 1.072 | 1.037 | 1.108 | 42.094 | 0.298 | -0.003 | 0.006 | 0.640 |
| FAM83A | 16 | 0.064 | 0.028 | 0.022 | 1.067 | 1.009 | 1.127 | 15.364 | 0.426 | 0.008 | 0.005 | 0.178 |
| FAM86B1 | 6 | -0.097 | 0.032 | 0.002 | 0.908 | 0.853 | 0.965 | 7.886 | 0.163 | -0.006 | 0.014 | 0.693 |
| FAM86B3P | 9 | -0.243 | 0.054 | 0.000 | 0.784 | 0.706 | 0.871 | 9.202 | 0.326 | -0.006 | 0.015 | 0.683 |
| FANCD2 | 27 | -0.078 | 0.023 | 0.001 | 0.925 | 0.884 | 0.969 | 15.668 | 0.944 | -0.010 | 0.006 | 0.123 |
| FAS | 25 | 0.053 | 0.023 | 0.023 | 1.054 | 1.007 | 1.103 | 25.104 | 0.400 | -0.005 | 0.007 | 0.464 |
| FASLG | 5 | -0.156 | 0.067 | 0.020 | 0.855 | 0.750 | 0.975 | 0.568 | 0.967 | 0.007 | 0.015 | 0.655 |
| FASN | 22 | 0.045 | 0.020 | 0.028 | 1.046 | 1.005 | 1.089 | 27.355 | 0.159 | -0.004 | 0.011 | 0.705 |
| FBXL13 | 21 | 0.066 | 0.025 | 0.008 | 1.068 | 1.017 | 1.122 | 16.961 | 0.655 | 0.005 | 0.005 | 0.400 |
| FBXL17 | 17 | -0.096 | 0.035 | 0.007 | 0.909 | 0.848 | 0.974 | 8.479 | 0.933 | -0.006 | 0.008 | 0.455 |
| FBXO2 | 26 | 0.031 | 0.013 | 0.018 | 1.031 | 1.005 | 1.058 | 15.179 | 0.937 | 0.001 | 0.006 | 0.919 |
| FBXO25 | 8 | -0.129 | 0.061 | 0.036 | 0.879 | 0.779 | 0.992 | 6.894 | 0.440 | -0.018 | 0.018 | 0.357 |
| FBXO28 | 64 | 0.043 | 0.013 | 0.001 | 1.044 | 1.018 | 1.070 | 58.169 | 0.649 | 0.004 | 0.006 | 0.468 |
| FBXO44 | 10 | 0.116 | 0.042 | 0.006 | 1.123 | 1.034 | 1.218 | 5.049 | 0.830 | -0.010 | 0.013 | 0.480 |
| FBXO6 | 13 | 0.078 | 0.030 | 0.010 | 1.081 | 1.019 | 1.147 | 5.261 | 0.949 | 0.006 | 0.011 | 0.615 |
| FBXW8 | 22 | 0.069 | 0.025 | 0.006 | 1.071 | 1.020 | 1.125 | 24.470 | 0.271 | 0.016 | 0.009 | 0.087 |
| FER1L4 | 3 | -0.163 | 0.081 | 0.044 | 0.850 | 0.725 | 0.996 | 0.719 | 0.698 | -0.096 | 0.313 | 0.811 |
| FFAR3 | 17 | 0.058 | 0.022 | 0.008 | 1.060 | 1.015 | 1.106 | 7.740 | 0.956 | -0.002 | 0.010 | 0.804 |
| FGFR1OP | 18 | -0.071 | 0.027 | 0.008 | 0.932 | 0.884 | 0.982 | 6.223 | 0.992 | -0.003 | 0.007 | 0.656 |
| FHOD1 | 12 | -0.075 | 0.033 | 0.023 | 0.928 | 0.870 | 0.990 | 10.591 | 0.478 | -0.016 | 0.007 | 0.051 |
| FLJ27352 | 10 | -0.081 | 0.022 | 0.000 | 0.922 | 0.884 | 0.963 | 10.691 | 0.297 | -0.014 | 0.009 | 0.150 |
| FLNB-AS1 | 5 | 0.070 | 0.032 | 0.029 | 1.072 | 1.007 | 1.142 | 0.309 | 0.989 | 0.010 | 0.019 | 0.636 |
| FLT1P1 | 26 | -0.031 | 0.012 | 0.008 | 0.969 | 0.947 | 0.992 | 18.824 | 0.805 | -0.001 | 0.007 | 0.914 |
| FLYWCH1 | 38 | 0.050 | 0.015 | 0.001 | 1.051 | 1.020 | 1.083 | 38.351 | 0.408 | 0.004 | 0.008 | 0.641 |
| FNBP1P1 | 17 | -0.041 | 0.011 | 0.000 | 0.960 | 0.939 | 0.981 | 14.796 | 0.540 | -0.013 | 0.010 | 0.192 |
| FNBP4 | 7 | 0.165 | 0.063 | 0.009 | 1.180 | 1.043 | 1.335 | 3.435 | 0.753 | -0.007 | 0.018 | 0.729 |
| FOXRED1 | 66 | 0.029 | 0.011 | 0.010 | 1.029 | 1.007 | 1.052 | 61.399 | 0.604 | -0.004 | 0.003 | 0.218 |
| FPR2 | 61 | -0.033 | 0.012 | 0.004 | 0.967 | 0.945 | 0.989 | 65.649 | 0.287 | -0.001 | 0.004 | 0.804 |
| FPR3 | 36 | -0.042 | 0.019 | 0.027 | 0.959 | 0.923 | 0.995 | 34.355 | 0.499 | -0.002 | 0.006 | 0.697 |
| FSCN1 | 15 | -0.106 | 0.035 | 0.003 | 0.899 | 0.840 | 0.964 | 8.549 | 0.859 | 0.012 | 0.008 | 0.152 |
| FTCD | 19 | -0.096 | 0.037 | 0.009 | 0.909 | 0.846 | 0.977 | 5.690 | 0.997 | -0.004 | 0.010 | 0.726 |
| FTSJ3 | 32 | -0.044 | 0.019 | 0.020 | 0.957 | 0.923 | 0.993 | 31.070 | 0.463 | 0.001 | 0.007 | 0.929 |
| FUOM | 14 | -0.111 | 0.033 | 0.001 | 0.895 | 0.839 | 0.954 | 7.493 | 0.875 | -0.008 | 0.011 | 0.460 |
| GAB2 | 4 | 0.172 | 0.071 | 0.015 | 1.188 | 1.033 | 1.366 | 3.853 | 0.278 | -0.045 | 0.047 | 0.445 |
| GABPB1 | 5 | 0.190 | 0.070 | 0.006 | 1.210 | 1.055 | 1.387 | 1.897 | 0.755 | 0.002 | 0.022 | 0.937 |
| GADD45B | 17 | -0.083 | 0.035 | 0.017 | 0.921 | 0.860 | 0.985 | 8.796 | 0.922 | -0.002 | 0.007 | 0.786 |
| GAL3ST4 | 24 | 0.164 | 0.032 | 0.000 | 1.179 | 1.108 | 1.254 | 27.641 | 0.230 | -0.009 | 0.009 | 0.310 |
| GALK1 | 14 | -0.156 | 0.036 | 0.000 | 0.855 | 0.797 | 0.917 | 5.073 | 0.974 | 0.007 | 0.009 | 0.457 |
| GAS2L1 | 3 | 0.167 | 0.085 | 0.049 | 1.182 | 1.001 | 1.395 | 1.757 | 0.415 | 0.030 | 0.023 | 0.416 |
| GATAD2A | 42 | -0.061 | 0.016 | 0.000 | 0.940 | 0.911 | 0.971 | 31.599 | 0.854 | -0.006 | 0.006 | 0.370 |
| GATC | 21 | -0.086 | 0.029 | 0.003 | 0.918 | 0.868 | 0.971 | 22.137 | 0.333 | 0.006 | 0.009 | 0.525 |
| GBP3 | 82 | 0.025 | 0.010 | 0.013 | 1.025 | 1.005 | 1.046 | 84.267 | 0.380 | -0.002 | 0.004 | 0.508 |
| GBP4 | 18 | 0.063 | 0.031 | 0.047 | 1.065 | 1.001 | 1.132 | 16.204 | 0.509 | 0.010 | 0.012 | 0.415 |
| GCA | 3 | -0.236 | 0.118 | 0.046 | 0.790 | 0.626 | 0.996 | 0.251 | 0.882 | 0.007 | 0.023 | 0.806 |
| GCM1 | 16 | -0.153 | 0.038 | 0.000 | 0.858 | 0.797 | 0.925 | 18.754 | 0.225 | -0.018 | 0.009 | 0.074 |
| GDPD3 | 12 | -0.098 | 0.046 | 0.033 | 0.906 | 0.828 | 0.992 | 6.785 | 0.816 | -0.020 | 0.015 | 0.202 |
| GEMIN4 | 12 | -0.077 | 0.036 | 0.033 | 0.926 | 0.863 | 0.994 | 12.967 | 0.295 | 0.003 | 0.010 | 0.791 |
| GEN1 | 11 | -0.112 | 0.050 | 0.023 | 0.894 | 0.811 | 0.985 | 10.297 | 0.415 | 0.015 | 0.015 | 0.334 |
| GFRA2 | 31 | 0.055 | 0.017 | 0.001 | 1.057 | 1.022 | 1.093 | 24.231 | 0.761 | 0.007 | 0.008 | 0.387 |
| GGA1 | 9 | -0.083 | 0.036 | 0.022 | 0.920 | 0.857 | 0.988 | 5.931 | 0.655 | -0.002 | 0.009 | 0.860 |
| GGPS1 | 14 | -0.104 | 0.031 | 0.001 | 0.901 | 0.848 | 0.958 | 15.010 | 0.307 | -0.006 | 0.010 | 0.544 |
| GIGYF1 | 19 | 0.105 | 0.035 | 0.003 | 1.110 | 1.036 | 1.190 | 24.318 | 0.145 | 0.011 | 0.008 | 0.204 |
| GIMAP5 | 29 | -0.051 | 0.016 | 0.002 | 0.950 | 0.920 | 0.981 | 25.921 | 0.577 | 0.003 | 0.007 | 0.704 |
| GK5 | 4 | -0.157 | 0.062 | 0.011 | 0.855 | 0.757 | 0.965 | 3.395 | 0.335 | 0.010 | 0.026 | 0.741 |
| GLB1 | 12 | -0.095 | 0.034 | 0.005 | 0.909 | 0.851 | 0.971 | 6.544 | 0.835 | 0.009 | 0.012 | 0.489 |
| GLB1L | 39 | -0.037 | 0.013 | 0.004 | 0.964 | 0.940 | 0.988 | 36.110 | 0.557 | 0.000 | 0.005 | 0.984 |
| GLE1 | 8 | -0.084 | 0.042 | 0.043 | 0.919 | 0.847 | 0.998 | 0.717 | 0.998 | -0.005 | 0.011 | 0.640 |
| GLS | 19 | -0.098 | 0.036 | 0.007 | 0.906 | 0.844 | 0.973 | 18.554 | 0.420 | 0.002 | 0.011 | 0.849 |
| GLT1D1 | 10 | 0.096 | 0.032 | 0.003 | 1.100 | 1.033 | 1.172 | 9.380 | 0.403 | -0.003 | 0.009 | 0.743 |
| GLT25D2 | 61 | 0.034 | 0.012 | 0.005 | 1.035 | 1.011 | 1.059 | 58.449 | 0.533 | 0.005 | 0.005 | 0.318 |
| GLTP | 17 | 0.055 | 0.024 | 0.022 | 1.057 | 1.008 | 1.108 | 16.005 | 0.453 | 0.018 | 0.010 | 0.087 |
| GM2A | 58 | 0.031 | 0.011 | 0.007 | 1.031 | 1.009 | 1.054 | 72.404 | 0.082 | 0.002 | 0.004 | 0.686 |
| GMEB2 | 5 | -0.116 | 0.049 | 0.017 | 0.890 | 0.809 | 0.980 | 2.359 | 0.670 | -0.017 | 0.016 | 0.390 |
| GNA12 | 23 | -0.073 | 0.025 | 0.003 | 0.929 | 0.885 | 0.975 | 18.423 | 0.681 | 0.004 | 0.007 | 0.594 |
| GNAO1 | 9 | 0.089 | 0.043 | 0.042 | 1.093 | 1.003 | 1.190 | 4.077 | 0.850 | 0.008 | 0.010 | 0.460 |
| GNAQ | 7 | 0.141 | 0.062 | 0.023 | 1.151 | 1.020 | 1.300 | 3.416 | 0.755 | -0.010 | 0.017 | 0.587 |
| GNB1L | 27 | 0.059 | 0.016 | 0.000 | 1.061 | 1.028 | 1.095 | 20.963 | 0.744 | 0.005 | 0.005 | 0.298 |
| GNG5 | 9 | -0.088 | 0.038 | 0.021 | 0.916 | 0.850 | 0.987 | 5.320 | 0.723 | -0.010 | 0.014 | 0.490 |
| GNGT2 | 32 | 0.040 | 0.020 | 0.047 | 1.041 | 1.000 | 1.083 | 30.309 | 0.501 | -0.001 | 0.006 | 0.850 |
| GNMT | 28 | -0.037 | 0.016 | 0.025 | 0.964 | 0.933 | 0.996 | 25.946 | 0.522 | 0.005 | 0.008 | 0.549 |
| GNPTAB | 9 | -0.136 | 0.054 | 0.011 | 0.873 | 0.786 | 0.969 | 10.118 | 0.257 | -0.013 | 0.014 | 0.405 |
| GOLGA6L5 | 17 | 0.045 | 0.018 | 0.015 | 1.046 | 1.009 | 1.084 | 25.211 | 0.066 | -0.001 | 0.010 | 0.942 |
| GOLGB1 | 39 | -0.039 | 0.015 | 0.011 | 0.962 | 0.933 | 0.991 | 42.328 | 0.290 | -0.001 | 0.005 | 0.830 |
| GORAB | 24 | 0.062 | 0.023 | 0.006 | 1.064 | 1.018 | 1.112 | 22.708 | 0.478 | 0.000 | 0.006 | 0.988 |
| GPCPD1 | 22 | 0.062 | 0.026 | 0.016 | 1.064 | 1.012 | 1.119 | 17.270 | 0.695 | 0.000 | 0.009 | 0.965 |
| GPD2 | 38 | -0.096 | 0.021 | 0.000 | 0.908 | 0.872 | 0.946 | 44.898 | 0.175 | -0.008 | 0.006 | 0.185 |
| GPR137B | 42 | 0.053 | 0.016 | 0.001 | 1.054 | 1.022 | 1.087 | 43.163 | 0.379 | 0.007 | 0.005 | 0.159 |
| GPR146 | 27 | 0.031 | 0.014 | 0.032 | 1.031 | 1.003 | 1.061 | 18.766 | 0.846 | 0.003 | 0.006 | 0.620 |
| GPR56 | 13 | -0.105 | 0.033 | 0.001 | 0.900 | 0.845 | 0.960 | 7.666 | 0.811 | 0.011 | 0.010 | 0.291 |
| GPSM2 | 5 | 0.208 | 0.082 | 0.011 | 1.232 | 1.049 | 1.446 | 4.106 | 0.392 | 0.019 | 0.015 | 0.313 |
| GPX2 | 3 | -0.243 | 0.094 | 0.010 | 0.785 | 0.653 | 0.943 | 0.020 | 0.990 | -0.002 | 0.023 | 0.947 |
| GRAP2 | 5 | -0.216 | 0.082 | 0.008 | 0.806 | 0.687 | 0.946 | 2.865 | 0.581 | -0.008 | 0.020 | 0.720 |
| GRIP1 | 4 | -0.271 | 0.079 | 0.001 | 0.763 | 0.653 | 0.890 | 1.190 | 0.755 | -0.026 | 0.038 | 0.564 |
| GRK5 | 16 | 0.164 | 0.044 | 0.000 | 1.178 | 1.080 | 1.286 | 23.194 | 0.080 | -0.005 | 0.012 | 0.653 |
| GRN | 16 | 0.099 | 0.038 | 0.009 | 1.104 | 1.025 | 1.190 | 20.260 | 0.162 | 0.000 | 0.009 | 0.962 |
| GS1-124K5.12 | 14 | -0.021 | 0.010 | 0.030 | 0.979 | 0.960 | 0.998 | 8.059 | 0.840 | 0.005 | 0.007 | 0.559 |
| GS1-410F4.3 | 10 | 0.032 | 0.015 | 0.037 | 1.032 | 1.002 | 1.063 | 7.342 | 0.602 | -0.010 | 0.011 | 0.363 |
| GSTCD | 6 | -0.213 | 0.055 | 0.000 | 0.808 | 0.725 | 0.901 | 3.269 | 0.659 | -0.013 | 0.013 | 0.367 |
| GSTO2 | 16 | -0.118 | 0.037 | 0.001 | 0.889 | 0.827 | 0.955 | 14.334 | 0.500 | -0.015 | 0.010 | 0.157 |
| GTF2A2 | 11 | 0.071 | 0.025 | 0.005 | 1.074 | 1.022 | 1.128 | 7.354 | 0.692 | -0.009 | 0.012 | 0.448 |
| GTF2H1 | 26 | -0.072 | 0.024 | 0.003 | 0.931 | 0.888 | 0.975 | 19.979 | 0.748 | 0.005 | 0.007 | 0.488 |
| GTF2H2 | 12 | -0.041 | 0.015 | 0.006 | 0.960 | 0.932 | 0.988 | 5.930 | 0.878 | 0.010 | 0.013 | 0.447 |
| GTF2H2B | 7 | -0.047 | 0.014 | 0.001 | 0.954 | 0.928 | 0.982 | 4.511 | 0.608 | 0.007 | 0.017 | 0.714 |
| GTF2H3 | 4 | -0.336 | 0.069 | 0.000 | 0.715 | 0.624 | 0.819 | 1.456 | 0.692 | -0.008 | 0.018 | 0.691 |
| GTF2I | 9 | 0.085 | 0.025 | 0.001 | 1.089 | 1.038 | 1.143 | 6.990 | 0.538 | 0.000 | 0.019 | 0.988 |
| GTF3C3 | 11 | -0.096 | 0.032 | 0.003 | 0.909 | 0.853 | 0.968 | 8.553 | 0.575 | 0.001 | 0.007 | 0.870 |
| GUSBP3 | 17 | -0.026 | 0.011 | 0.019 | 0.975 | 0.954 | 0.996 | 16.671 | 0.407 | -0.008 | 0.009 | 0.403 |
| GXYLT1 | 24 | -0.074 | 0.029 | 0.009 | 0.928 | 0.878 | 0.982 | 19.403 | 0.678 | -0.005 | 0.007 | 0.501 |
| GYG1 | 17 | 0.068 | 0.023 | 0.004 | 1.070 | 1.022 | 1.121 | 13.415 | 0.642 | 0.001 | 0.010 | 0.957 |
| GYPB | 9 | -0.079 | 0.035 | 0.022 | 0.924 | 0.863 | 0.989 | 6.517 | 0.589 | 0.018 | 0.014 | 0.234 |
| GYS1 | 3 | 0.227 | 0.069 | 0.001 | 1.254 | 1.096 | 1.436 | 1.468 | 0.480 | 0.018 | 0.020 | 0.526 |
| GZMK | 11 | -0.107 | 0.043 | 0.013 | 0.898 | 0.825 | 0.978 | 5.583 | 0.849 | 0.005 | 0.013 | 0.704 |
| H1FNT | 7 | 0.160 | 0.075 | 0.034 | 1.173 | 1.012 | 1.360 | 10.635 | 0.100 | -0.039 | 0.016 | 0.060 |
| H3F3A | 18 | -0.030 | 0.015 | 0.048 | 0.970 | 0.942 | 1.000 | 19.999 | 0.274 | 0.005 | 0.007 | 0.529 |
| H3F3B | 3 | -0.254 | 0.085 | 0.003 | 0.776 | 0.656 | 0.917 | 1.569 | 0.456 | 0.020 | 0.055 | 0.774 |
| H6PD | 39 | 0.053 | 0.020 | 0.009 | 1.054 | 1.013 | 1.097 | 52.060 | 0.064 | 0.010 | 0.006 | 0.131 |
| HAUS4 | 64 | -0.033 | 0.010 | 0.001 | 0.968 | 0.949 | 0.987 | 65.246 | 0.399 | -0.001 | 0.004 | 0.718 |
| HAUS6 | 3 | 0.194 | 0.067 | 0.004 | 1.214 | 1.065 | 1.384 | 1.135 | 0.567 | -0.022 | 0.022 | 0.491 |
| HCLS1 | 63 | 0.034 | 0.012 | 0.005 | 1.035 | 1.011 | 1.059 | 59.748 | 0.558 | -0.002 | 0.004 | 0.535 |
| HEATR6 | 36 | 0.030 | 0.014 | 0.033 | 1.030 | 1.002 | 1.059 | 16.774 | 0.996 | 0.000 | 0.005 | 0.953 |
| HECTD1 | 4 | 0.190 | 0.089 | 0.034 | 1.209 | 1.015 | 1.441 | 2.729 | 0.435 | 0.022 | 0.018 | 0.340 |
| HES6 | 26 | -0.059 | 0.023 | 0.010 | 0.943 | 0.902 | 0.986 | 15.844 | 0.919 | -0.005 | 0.007 | 0.522 |
| HGSNAT | 4 | -0.210 | 0.106 | 0.048 | 0.811 | 0.658 | 0.998 | 1.321 | 0.724 | 0.023 | 0.058 | 0.733 |
| HHEX | 18 | -0.109 | 0.038 | 0.004 | 0.897 | 0.832 | 0.966 | 22.960 | 0.151 | -0.017 | 0.010 | 0.104 |
| HIATL1 | 50 | -0.030 | 0.011 | 0.006 | 0.970 | 0.949 | 0.991 | 38.932 | 0.848 | -0.006 | 0.005 | 0.178 |
| HIF1A | 5 | 0.128 | 0.065 | 0.049 | 1.137 | 1.001 | 1.291 | 1.368 | 0.850 | 0.017 | 0.017 | 0.375 |
| HIST1H2BG | 11 | -0.059 | 0.030 | 0.048 | 0.943 | 0.889 | 0.999 | 9.836 | 0.455 | -0.006 | 0.009 | 0.490 |
| HIST1H4E | 10 | 0.179 | 0.054 | 0.001 | 1.196 | 1.076 | 1.330 | 9.933 | 0.356 | -0.003 | 0.025 | 0.917 |
| HIST1H4H | 53 | 0.088 | 0.017 | 0.000 | 1.092 | 1.056 | 1.128 | 45.533 | 0.725 | -0.008 | 0.005 | 0.144 |
| HLA-F | 36 | 0.033 | 0.011 | 0.004 | 1.034 | 1.011 | 1.057 | 28.517 | 0.773 | -0.007 | 0.009 | 0.419 |
| HLA-L | 15 | -0.071 | 0.016 | 0.000 | 0.932 | 0.903 | 0.961 | 13.110 | 0.518 | -0.005 | 0.009 | 0.587 |
| HMGB3P32 | 6 | -0.046 | 0.023 | 0.044 | 0.955 | 0.914 | 0.999 | 4.100 | 0.535 | 0.026 | 0.017 | 0.197 |
| HMGN4 | 34 | 0.027 | 0.012 | 0.026 | 1.028 | 1.003 | 1.053 | 27.287 | 0.747 | 0.000 | 0.005 | 0.965 |
| HNRNPF | 17 | -0.072 | 0.034 | 0.033 | 0.931 | 0.871 | 0.994 | 14.708 | 0.546 | -0.004 | 0.008 | 0.676 |
| HOTAIRM1 | 55 | -0.027 | 0.006 | 0.000 | 0.973 | 0.961 | 0.985 | 51.959 | 0.554 | -0.004 | 0.006 | 0.508 |
| HOXA1 | 13 | -0.090 | 0.044 | 0.041 | 0.914 | 0.839 | 0.996 | 8.521 | 0.743 | -0.006 | 0.011 | 0.567 |
| HOXA2 | 24 | -0.052 | 0.025 | 0.036 | 0.949 | 0.905 | 0.997 | 15.821 | 0.863 | -0.006 | 0.010 | 0.525 |
| HOXB-AS1 | 23 | 0.027 | 0.012 | 0.020 | 1.027 | 1.004 | 1.051 | 26.348 | 0.237 | 0.006 | 0.009 | 0.488 |
| HOXB3 | 23 | 0.086 | 0.029 | 0.003 | 1.089 | 1.029 | 1.153 | 28.067 | 0.173 | 0.013 | 0.008 | 0.141 |
| HOXB4 | 30 | 0.057 | 0.024 | 0.017 | 1.059 | 1.010 | 1.110 | 36.765 | 0.152 | -0.001 | 0.008 | 0.934 |
| HPCAL1 | 30 | -0.045 | 0.018 | 0.013 | 0.956 | 0.922 | 0.990 | 23.516 | 0.752 | 0.004 | 0.006 | 0.440 |
| HPCAL4 | 67 | 0.030 | 0.011 | 0.008 | 1.030 | 1.008 | 1.054 | 44.568 | 0.980 | 0.005 | 0.005 | 0.336 |
| HPD | 27 | 0.063 | 0.015 | 0.000 | 1.065 | 1.035 | 1.095 | 19.041 | 0.835 | 0.018 | 0.010 | 0.086 |
| HSD17B1P1 | 10 | 0.052 | 0.026 | 0.042 | 1.054 | 1.002 | 1.109 | 9.655 | 0.379 | 0.026 | 0.012 | 0.070 |
| HSDL1 | 25 | 0.042 | 0.020 | 0.033 | 1.043 | 1.003 | 1.083 | 20.054 | 0.694 | -0.004 | 0.006 | 0.437 |
| HSP90AA1 | 17 | -0.080 | 0.033 | 0.016 | 0.923 | 0.865 | 0.985 | 13.514 | 0.635 | -0.005 | 0.009 | 0.595 |
| HTR6 | 20 | 0.063 | 0.029 | 0.033 | 1.065 | 1.005 | 1.128 | 13.567 | 0.808 | 0.003 | 0.007 | 0.706 |
| HTRA1 | 23 | 0.062 | 0.029 | 0.033 | 1.064 | 1.005 | 1.127 | 31.075 | 0.095 | 0.007 | 0.008 | 0.401 |
| IARS | 12 | -0.069 | 0.033 | 0.040 | 0.934 | 0.875 | 0.997 | 7.661 | 0.743 | -0.008 | 0.010 | 0.441 |
| IFI27L1 | 35 | -0.036 | 0.015 | 0.014 | 0.964 | 0.937 | 0.993 | 31.252 | 0.603 | -0.002 | 0.006 | 0.721 |
| IFI44 | 4 | 0.171 | 0.077 | 0.027 | 1.187 | 1.020 | 1.381 | 1.590 | 0.662 | -0.004 | 0.015 | 0.834 |
| IFITM4P | 17 | -0.025 | 0.010 | 0.010 | 0.976 | 0.958 | 0.994 | 18.702 | 0.284 | 0.005 | 0.010 | 0.618 |
| IFNAR1 | 34 | 0.046 | 0.022 | 0.038 | 1.047 | 1.002 | 1.093 | 44.537 | 0.087 | 0.010 | 0.007 | 0.152 |
| IFNG-AS1 | 41 | -0.024 | 0.008 | 0.004 | 0.976 | 0.960 | 0.993 | 31.033 | 0.844 | 0.008 | 0.005 | 0.100 |
| IFNL1 | 12 | -0.078 | 0.034 | 0.024 | 0.925 | 0.865 | 0.990 | 9.870 | 0.542 | -0.008 | 0.012 | 0.518 |
| IFT57 | 13 | -0.098 | 0.045 | 0.028 | 0.907 | 0.831 | 0.990 | 14.994 | 0.242 | 0.014 | 0.010 | 0.171 |
| IGF2R | 4 | 0.322 | 0.102 | 0.002 | 1.379 | 1.130 | 1.684 | 1.362 | 0.715 | 0.028 | 0.043 | 0.580 |
| IGHV1-69 | 15 | 0.020 | 0.010 | 0.034 | 1.021 | 1.002 | 1.040 | 10.245 | 0.744 | -0.023 | 0.019 | 0.227 |
| IGLV7-46 | 10 | -0.051 | 0.021 | 0.017 | 0.950 | 0.911 | 0.991 | 0.514 | 1.000 | -0.004 | 0.014 | 0.798 |
| IKBKB | 8 | 0.136 | 0.052 | 0.010 | 1.146 | 1.034 | 1.270 | 5.073 | 0.651 | -0.024 | 0.022 | 0.317 |
| IKBKE | 20 | 0.043 | 0.016 | 0.007 | 1.044 | 1.012 | 1.077 | 13.237 | 0.826 | 0.000 | 0.009 | 0.959 |
| IL27 | 7 | 0.125 | 0.057 | 0.029 | 1.133 | 1.013 | 1.268 | 4.169 | 0.654 | 0.036 | 0.027 | 0.237 |
| IL2RB | 4 | 0.250 | 0.111 | 0.024 | 1.284 | 1.033 | 1.597 | 1.359 | 0.715 | -0.061 | 0.085 | 0.547 |
| IL9RP3 | 14 | 0.028 | 0.011 | 0.011 | 1.029 | 1.006 | 1.052 | 11.508 | 0.568 | 0.015 | 0.008 | 0.080 |
| ILDR1 | 8 | -0.242 | 0.053 | 0.000 | 0.785 | 0.708 | 0.871 | 7.298 | 0.399 | -0.010 | 0.008 | 0.254 |
| ILF3-AS1 | 15 | 0.044 | 0.021 | 0.034 | 1.045 | 1.003 | 1.088 | 17.875 | 0.213 | -0.001 | 0.010 | 0.948 |
| IMMP2L | 47 | 0.058 | 0.013 | 0.000 | 1.060 | 1.033 | 1.087 | 38.536 | 0.775 | 0.005 | 0.007 | 0.465 |
| IMMT | 43 | -0.061 | 0.016 | 0.000 | 0.941 | 0.913 | 0.970 | 48.619 | 0.224 | -0.005 | 0.007 | 0.474 |
| ING5 | 40 | -0.050 | 0.017 | 0.003 | 0.951 | 0.921 | 0.983 | 43.943 | 0.270 | -0.007 | 0.006 | 0.216 |
| INHBB | 23 | 0.068 | 0.029 | 0.018 | 1.070 | 1.012 | 1.133 | 16.623 | 0.784 | 0.009 | 0.009 | 0.350 |
| INTS10 | 34 | 0.057 | 0.020 | 0.004 | 1.059 | 1.019 | 1.101 | 30.406 | 0.597 | 0.004 | 0.007 | 0.513 |
| IPO9 | 5 | -0.161 | 0.062 | 0.009 | 0.851 | 0.755 | 0.961 | 1.562 | 0.816 | 0.022 | 0.034 | 0.565 |
| IQCB1 | 67 | -0.023 | 0.011 | 0.040 | 0.977 | 0.956 | 0.999 | 65.817 | 0.483 | 0.002 | 0.004 | 0.696 |
| IQGAP1 | 39 | 0.053 | 0.016 | 0.001 | 1.054 | 1.021 | 1.088 | 37.908 | 0.474 | -0.003 | 0.007 | 0.627 |
| IRF1 | 3 | -0.467 | 0.175 | 0.008 | 0.627 | 0.445 | 0.883 | 4.305 | 0.116 | -0.042 | 0.039 | 0.473 |
| IRF2BP2 | 3 | 0.194 | 0.093 | 0.036 | 1.215 | 1.013 | 1.457 | 1.911 | 0.385 | -0.003 | 0.033 | 0.952 |
| IRF7 | 14 | -0.077 | 0.039 | 0.049 | 0.926 | 0.858 | 1.000 | 18.969 | 0.124 | 0.004 | 0.013 | 0.751 |
| IRS1 | 18 | -0.071 | 0.028 | 0.010 | 0.931 | 0.882 | 0.983 | 18.030 | 0.387 | -0.004 | 0.007 | 0.543 |
| IRS2 | 8 | -0.167 | 0.069 | 0.015 | 0.846 | 0.739 | 0.968 | 3.609 | 0.824 | -0.005 | 0.018 | 0.798 |
| IRX3 | 32 | -0.031 | 0.013 | 0.018 | 0.970 | 0.945 | 0.995 | 16.918 | 0.981 | 0.006 | 0.005 | 0.188 |
| ISCA2 | 39 | 0.039 | 0.014 | 0.007 | 1.040 | 1.011 | 1.070 | 30.177 | 0.813 | 0.004 | 0.008 | 0.595 |
| ISG20 | 36 | 0.037 | 0.015 | 0.013 | 1.038 | 1.008 | 1.068 | 35.047 | 0.466 | 0.001 | 0.008 | 0.874 |
| ISPD | 7 | 0.254 | 0.054 | 0.000 | 1.290 | 1.161 | 1.433 | 8.011 | 0.237 | -0.007 | 0.015 | 0.660 |
| ISY1 | 5 | -0.260 | 0.108 | 0.016 | 0.771 | 0.623 | 0.953 | 3.253 | 0.516 | -0.039 | 0.027 | 0.246 |
| ITCH | 13 | -0.122 | 0.055 | 0.028 | 0.886 | 0.794 | 0.987 | 18.940 | 0.090 | 0.009 | 0.013 | 0.494 |
| ITFG3 | 12 | 0.088 | 0.032 | 0.006 | 1.092 | 1.026 | 1.161 | 12.593 | 0.321 | 0.004 | 0.010 | 0.692 |
| ITGA4 | 48 | 0.027 | 0.013 | 0.042 | 1.027 | 1.001 | 1.054 | 41.195 | 0.711 | 0.001 | 0.006 | 0.820 |
| ITGAM | 7 | -0.245 | 0.097 | 0.012 | 0.783 | 0.647 | 0.947 | 7.529 | 0.275 | -0.020 | 0.030 | 0.541 |
| ITGAX | 44 | -0.025 | 0.011 | 0.023 | 0.975 | 0.955 | 0.997 | 48.366 | 0.265 | -0.008 | 0.007 | 0.229 |
| ITGB7 | 22 | 0.061 | 0.022 | 0.006 | 1.063 | 1.018 | 1.109 | 14.513 | 0.847 | -0.004 | 0.006 | 0.461 |
| ITIH4 | 47 | -0.028 | 0.014 | 0.037 | 0.972 | 0.947 | 0.998 | 54.751 | 0.177 | -0.002 | 0.005 | 0.709 |
| ITK | 19 | 0.105 | 0.031 | 0.001 | 1.110 | 1.045 | 1.180 | 13.901 | 0.735 | -0.005 | 0.009 | 0.554 |
| ITPA | 29 | 0.043 | 0.018 | 0.014 | 1.044 | 1.009 | 1.080 | 25.828 | 0.582 | 0.002 | 0.006 | 0.747 |
| ITPKC | 4 | -0.344 | 0.134 | 0.010 | 0.709 | 0.545 | 0.922 | 7.276 | 0.064 | 0.058 | 0.023 | 0.127 |
| ITPRIP | 9 | -0.154 | 0.046 | 0.001 | 0.857 | 0.782 | 0.938 | 6.395 | 0.603 | 0.000 | 0.015 | 0.992 |
| IVD | 44 | 0.035 | 0.015 | 0.019 | 1.036 | 1.006 | 1.067 | 47.470 | 0.295 | 0.002 | 0.005 | 0.658 |
| JAKMIP3 | 6 | -0.112 | 0.056 | 0.047 | 0.894 | 0.801 | 0.999 | 3.000 | 0.700 | 0.005 | 0.011 | 0.695 |
| KAT8 | 11 | 0.165 | 0.050 | 0.001 | 1.180 | 1.069 | 1.302 | 18.070 | 0.054 | -0.005 | 0.014 | 0.716 |
| KCNC3 | 4 | 0.313 | 0.086 | 0.000 | 1.368 | 1.156 | 1.618 | 0.577 | 0.902 | -0.010 | 0.024 | 0.723 |
| KCNG2 | 5 | 0.255 | 0.087 | 0.004 | 1.290 | 1.087 | 1.531 | 5.825 | 0.213 | -0.014 | 0.030 | 0.674 |
| KCNH3 | 5 | 0.195 | 0.060 | 0.001 | 1.215 | 1.080 | 1.366 | 2.206 | 0.698 | -0.006 | 0.019 | 0.790 |
| KCNJ15 | 38 | 0.045 | 0.017 | 0.010 | 1.046 | 1.011 | 1.083 | 42.335 | 0.252 | 0.008 | 0.006 | 0.204 |
| KCTD2 | 28 | 0.054 | 0.022 | 0.017 | 1.055 | 1.010 | 1.103 | 20.915 | 0.790 | -0.003 | 0.007 | 0.712 |
| KDM1B | 23 | -0.077 | 0.034 | 0.026 | 0.926 | 0.866 | 0.991 | 33.062 | 0.061 | -0.001 | 0.010 | 0.942 |
| KDM5A | 29 | 0.049 | 0.020 | 0.012 | 1.051 | 1.011 | 1.092 | 18.675 | 0.908 | -0.007 | 0.006 | 0.291 |
| KIAA0146 | 4 | 0.185 | 0.074 | 0.012 | 1.204 | 1.041 | 1.392 | 0.264 | 0.967 | -0.009 | 0.024 | 0.752 |
| KIAA0319L | 5 | 0.125 | 0.052 | 0.017 | 1.133 | 1.023 | 1.255 | 4.585 | 0.333 | 0.024 | 0.017 | 0.248 |
| KIAA0753 | 16 | -0.072 | 0.027 | 0.008 | 0.931 | 0.882 | 0.982 | 12.653 | 0.629 | -0.007 | 0.007 | 0.369 |
| KIAA1143 | 23 | 0.089 | 0.023 | 0.000 | 1.093 | 1.045 | 1.144 | 22.736 | 0.417 | 0.005 | 0.007 | 0.444 |
| KIAA1841 | 60 | -0.028 | 0.012 | 0.016 | 0.972 | 0.950 | 0.995 | 70.704 | 0.141 | 0.006 | 0.006 | 0.350 |
| KIAA1967 | 12 | 0.060 | 0.028 | 0.032 | 1.062 | 1.005 | 1.122 | 4.985 | 0.932 | 0.007 | 0.009 | 0.494 |
| KIF16B | 53 | -0.036 | 0.011 | 0.001 | 0.964 | 0.943 | 0.986 | 45.409 | 0.729 | -0.004 | 0.004 | 0.371 |
| KIF1B | 57 | 0.035 | 0.012 | 0.003 | 1.035 | 1.012 | 1.060 | 73.928 | 0.055 | 0.005 | 0.005 | 0.291 |
| KIF24 | 5 | -0.205 | 0.076 | 0.007 | 0.815 | 0.702 | 0.946 | 1.741 | 0.783 | -0.001 | 0.012 | 0.920 |
| KIF26A | 19 | 0.132 | 0.025 | 0.000 | 1.142 | 1.087 | 1.198 | 13.892 | 0.736 | 0.008 | 0.007 | 0.304 |
| KL | 23 | 0.072 | 0.034 | 0.037 | 1.075 | 1.005 | 1.150 | 23.277 | 0.386 | 0.006 | 0.008 | 0.473 |
| KLHDC7A | 6 | 0.322 | 0.070 | 0.000 | 1.379 | 1.203 | 1.582 | 1.997 | 0.850 | 0.016 | 0.017 | 0.394 |
| KLHL23 | 4 | -0.172 | 0.087 | 0.048 | 0.842 | 0.710 | 0.998 | 3.138 | 0.371 | -0.038 | 0.022 | 0.223 |
| KLHL8 | 14 | 0.105 | 0.040 | 0.008 | 1.111 | 1.027 | 1.201 | 13.277 | 0.427 | 0.015 | 0.008 | 0.097 |
| KLRB1 | 16 | 0.070 | 0.033 | 0.033 | 1.073 | 1.006 | 1.145 | 11.183 | 0.740 | 0.010 | 0.009 | 0.287 |
| KLRC2 | 29 | 0.046 | 0.016 | 0.004 | 1.047 | 1.015 | 1.079 | 26.454 | 0.548 | 0.000 | 0.006 | 0.974 |
| KNSTRN | 39 | -0.027 | 0.012 | 0.025 | 0.974 | 0.951 | 0.997 | 29.513 | 0.836 | 0.004 | 0.004 | 0.362 |
| KPNB1 | 3 | 0.168 | 0.074 | 0.024 | 1.182 | 1.023 | 1.367 | 1.577 | 0.455 | -0.002 | 0.046 | 0.967 |
| KRIT1 | 4 | 0.284 | 0.130 | 0.030 | 1.328 | 1.028 | 1.715 | 7.474 | 0.058 | -0.031 | 0.034 | 0.460 |
| KRT17P2 | 36 | 0.021 | 0.010 | 0.029 | 1.022 | 1.002 | 1.041 | 34.802 | 0.478 | 0.006 | 0.007 | 0.421 |
| KRT73 | 76 | 0.019 | 0.010 | 0.043 | 1.020 | 1.001 | 1.039 | 63.222 | 0.832 | -0.005 | 0.003 | 0.195 |
| LA16c-358B7.3 | 10 | 0.057 | 0.021 | 0.006 | 1.058 | 1.016 | 1.102 | 2.993 | 0.965 | -0.005 | 0.017 | 0.790 |
| LAIR1 | 12 | 0.077 | 0.028 | 0.005 | 1.080 | 1.023 | 1.140 | 7.647 | 0.745 | 0.014 | 0.009 | 0.165 |
| LAIR2 | 24 | 0.042 | 0.017 | 0.013 | 1.043 | 1.009 | 1.078 | 19.765 | 0.656 | -0.003 | 0.007 | 0.681 |
| LAMTOR1 | 11 | -0.091 | 0.044 | 0.036 | 0.913 | 0.838 | 0.994 | 15.464 | 0.116 | -0.015 | 0.013 | 0.269 |
| LAMTOR5 | 16 | -0.071 | 0.030 | 0.018 | 0.931 | 0.878 | 0.988 | 15.289 | 0.431 | -0.006 | 0.009 | 0.536 |
| LAP3 | 70 | 0.031 | 0.010 | 0.003 | 1.031 | 1.011 | 1.052 | 63.502 | 0.664 | 0.001 | 0.004 | 0.852 |
| LAX1 | 32 | -0.035 | 0.017 | 0.042 | 0.966 | 0.934 | 0.999 | 36.846 | 0.217 | -0.008 | 0.007 | 0.271 |
| LCA5L | 19 | 0.081 | 0.027 | 0.003 | 1.084 | 1.028 | 1.144 | 11.842 | 0.855 | 0.002 | 0.008 | 0.794 |
| LDLRAD3 | 7 | 0.125 | 0.064 | 0.050 | 1.133 | 1.000 | 1.284 | 2.526 | 0.866 | 0.017 | 0.012 | 0.213 |
| LEAP2 | 5 | -0.205 | 0.079 | 0.009 | 0.815 | 0.698 | 0.951 | 4.095 | 0.393 | -0.020 | 0.028 | 0.539 |
| LEMD2 | 14 | 0.167 | 0.038 | 0.000 | 1.182 | 1.097 | 1.273 | 7.436 | 0.878 | -0.014 | 0.009 | 0.164 |
| LEPREL1 | 11 | 0.088 | 0.038 | 0.022 | 1.092 | 1.013 | 1.176 | 9.842 | 0.454 | 0.017 | 0.008 | 0.056 |
| LEPROT | 63 | 0.040 | 0.013 | 0.002 | 1.041 | 1.015 | 1.067 | 72.216 | 0.176 | 0.009 | 0.005 | 0.082 |
| LETMD1 | 7 | 0.108 | 0.042 | 0.011 | 1.114 | 1.025 | 1.211 | 4.910 | 0.555 | 0.022 | 0.015 | 0.197 |
| LGALS17A | 3 | -0.168 | 0.083 | 0.043 | 0.845 | 0.718 | 0.995 | 1.505 | 0.471 | -0.017 | 0.042 | 0.750 |
| LGALS9 | 61 | -0.027 | 0.011 | 0.010 | 0.973 | 0.954 | 0.994 | 41.830 | 0.964 | 0.001 | 0.004 | 0.719 |
| LGALS9B | 40 | -0.025 | 0.007 | 0.001 | 0.976 | 0.961 | 0.990 | 29.178 | 0.874 | 0.002 | 0.005 | 0.711 |
| LGMN | 10 | -0.136 | 0.042 | 0.001 | 0.873 | 0.803 | 0.949 | 4.596 | 0.868 | 0.011 | 0.011 | 0.327 |
| LGSN | 43 | 0.069 | 0.019 | 0.000 | 1.072 | 1.033 | 1.112 | 51.132 | 0.158 | 0.016 | 0.009 | 0.079 |
| LILRA3 | 37 | -0.027 | 0.008 | 0.001 | 0.974 | 0.959 | 0.989 | 42.077 | 0.224 | -0.001 | 0.005 | 0.921 |
| LILRA6 | 12 | 0.073 | 0.030 | 0.016 | 1.076 | 1.014 | 1.142 | 10.253 | 0.508 | 0.014 | 0.010 | 0.181 |
| LILRB2 | 17 | 0.059 | 0.028 | 0.034 | 1.061 | 1.005 | 1.121 | 18.602 | 0.290 | -0.017 | 0.010 | 0.104 |
| LIMA1 | 24 | 0.061 | 0.023 | 0.007 | 1.063 | 1.017 | 1.112 | 17.609 | 0.778 | 0.015 | 0.008 | 0.085 |
| LIMD1 | 13 | 0.103 | 0.040 | 0.010 | 1.108 | 1.024 | 1.198 | 7.198 | 0.844 | 0.006 | 0.010 | 0.564 |
| LIMD2 | 4 | 0.203 | 0.075 | 0.007 | 1.225 | 1.057 | 1.420 | 1.774 | 0.621 | -0.010 | 0.017 | 0.633 |
| LIMK1 | 27 | 0.036 | 0.015 | 0.016 | 1.036 | 1.007 | 1.067 | 26.427 | 0.440 | -0.006 | 0.006 | 0.324 |
| LIMS2 | 28 | 0.043 | 0.020 | 0.026 | 1.044 | 1.005 | 1.085 | 39.461 | 0.057 | 0.007 | 0.008 | 0.389 |
| LIN54 | 5 | 0.193 | 0.061 | 0.001 | 1.213 | 1.077 | 1.366 | 0.882 | 0.927 | -0.002 | 0.017 | 0.905 |
| LIN7A | 17 | -0.046 | 0.017 | 0.008 | 0.955 | 0.923 | 0.988 | 10.746 | 0.825 | -0.002 | 0.006 | 0.787 |
| LIN9 | 4 | -0.202 | 0.103 | 0.049 | 0.817 | 0.668 | 0.999 | 4.393 | 0.222 | -0.003 | 0.034 | 0.939 |
| LINC00092 | 7 | -0.109 | 0.050 | 0.028 | 0.897 | 0.814 | 0.989 | 2.788 | 0.835 | -0.014 | 0.022 | 0.557 |
| LINC00205 | 9 | -0.051 | 0.025 | 0.042 | 0.950 | 0.904 | 0.998 | 8.934 | 0.348 | -0.027 | 0.012 | 0.052 |
| LINC00265 | 26 | -0.020 | 0.010 | 0.050 | 0.980 | 0.961 | 1.000 | 15.040 | 0.940 | 0.005 | 0.007 | 0.449 |
| LINC00402 | 15 | -0.073 | 0.023 | 0.001 | 0.929 | 0.888 | 0.972 | 10.101 | 0.755 | 0.013 | 0.009 | 0.178 |
| LINC00467 | 20 | 0.060 | 0.026 | 0.023 | 1.061 | 1.008 | 1.118 | 21.364 | 0.317 | 0.010 | 0.008 | 0.219 |
| LINC00476 | 32 | -0.032 | 0.011 | 0.004 | 0.968 | 0.947 | 0.990 | 34.969 | 0.285 | 0.002 | 0.006 | 0.665 |
| LINC00511 | 8 | -0.038 | 0.019 | 0.042 | 0.963 | 0.928 | 0.999 | 6.940 | 0.435 | -0.004 | 0.008 | 0.616 |
| LINC00525 | 11 | 0.119 | 0.049 | 0.015 | 1.126 | 1.023 | 1.239 | 13.466 | 0.199 | -0.004 | 0.013 | 0.797 |
| LINC00526 | 8 | -0.091 | 0.044 | 0.038 | 0.913 | 0.837 | 0.995 | 2.675 | 0.913 | 0.007 | 0.017 | 0.678 |
| LINC00689 | 12 | 0.087 | 0.028 | 0.002 | 1.091 | 1.031 | 1.153 | 5.751 | 0.889 | -0.007 | 0.009 | 0.479 |
| LINS | 56 | -0.025 | 0.011 | 0.019 | 0.975 | 0.955 | 0.996 | 48.158 | 0.731 | -0.003 | 0.004 | 0.390 |
| LMAN2 | 3 | 0.244 | 0.095 | 0.010 | 1.276 | 1.060 | 1.537 | 1.355 | 0.508 | -0.052 | 0.046 | 0.464 |
| LMNA | 9 | -0.089 | 0.042 | 0.036 | 0.915 | 0.842 | 0.994 | 11.897 | 0.156 | -0.003 | 0.011 | 0.815 |
| LMNB2 | 5 | -0.154 | 0.063 | 0.015 | 0.857 | 0.757 | 0.971 | 1.147 | 0.887 | 0.005 | 0.017 | 0.788 |
| LNPEP | 23 | -0.095 | 0.023 | 0.000 | 0.909 | 0.868 | 0.952 | 21.555 | 0.487 | -0.015 | 0.008 | 0.059 |
| LPAR5 | 24 | -0.068 | 0.026 | 0.011 | 0.934 | 0.887 | 0.984 | 19.096 | 0.696 | 0.005 | 0.007 | 0.521 |
| LRGUK | 24 | 0.031 | 0.014 | 0.028 | 1.032 | 1.003 | 1.061 | 27.755 | 0.225 | -0.001 | 0.010 | 0.906 |
| LRPAP1 | 18 | -0.068 | 0.033 | 0.039 | 0.934 | 0.876 | 0.997 | 22.838 | 0.155 | -0.018 | 0.009 | 0.065 |
| LRPPRC | 34 | 0.055 | 0.025 | 0.026 | 1.056 | 1.007 | 1.109 | 42.709 | 0.120 | 0.000 | 0.006 | 0.941 |
| LRRC27 | 21 | -0.057 | 0.029 | 0.049 | 0.945 | 0.893 | 1.000 | 24.090 | 0.238 | 0.004 | 0.009 | 0.677 |
| LRRC37B | 10 | -0.092 | 0.044 | 0.039 | 0.912 | 0.836 | 0.995 | 5.378 | 0.800 | 0.020 | 0.014 | 0.199 |
| LRRC46 | 14 | 0.135 | 0.039 | 0.001 | 1.145 | 1.061 | 1.235 | 5.534 | 0.961 | 0.010 | 0.010 | 0.346 |
| LRRK1 | 18 | 0.051 | 0.021 | 0.014 | 1.052 | 1.010 | 1.095 | 13.181 | 0.724 | 0.007 | 0.008 | 0.412 |
| LRRK2 | 38 | -0.038 | 0.019 | 0.044 | 0.963 | 0.928 | 0.999 | 32.150 | 0.696 | 0.007 | 0.007 | 0.304 |
| LUZP1 | 16 | -0.093 | 0.032 | 0.004 | 0.912 | 0.855 | 0.971 | 12.156 | 0.667 | -0.016 | 0.008 | 0.058 |
| LYPD2 | 27 | 0.055 | 0.023 | 0.018 | 1.056 | 1.009 | 1.105 | 28.923 | 0.315 | 0.011 | 0.010 | 0.304 |
| LYRM1 | 3 | -0.185 | 0.089 | 0.038 | 0.831 | 0.698 | 0.990 | 0.216 | 0.898 | 0.015 | 0.034 | 0.737 |
| LYZ | 95 | 0.020 | 0.009 | 0.022 | 1.020 | 1.003 | 1.038 | 97.748 | 0.375 | 0.002 | 0.003 | 0.527 |
| LZTS1 | 13 | -0.077 | 0.034 | 0.024 | 0.926 | 0.866 | 0.990 | 11.749 | 0.466 | -0.009 | 0.011 | 0.437 |
| MAD2L2 | 9 | 0.112 | 0.039 | 0.004 | 1.118 | 1.037 | 1.206 | 3.518 | 0.898 | -0.004 | 0.015 | 0.817 |
| MAFB | 13 | 0.113 | 0.040 | 0.005 | 1.120 | 1.035 | 1.211 | 12.144 | 0.434 | 0.022 | 0.011 | 0.084 |
| MAK | 26 | -0.050 | 0.023 | 0.029 | 0.952 | 0.910 | 0.995 | 19.241 | 0.785 | -0.003 | 0.007 | 0.660 |
| MAN1A1 | 35 | -0.045 | 0.022 | 0.041 | 0.956 | 0.915 | 0.998 | 26.347 | 0.823 | 0.000 | 0.007 | 0.983 |
| MAN1A2 | 12 | 0.089 | 0.045 | 0.046 | 1.093 | 1.002 | 1.193 | 16.780 | 0.115 | -0.011 | 0.014 | 0.450 |
| MAN1C1 | 7 | 0.101 | 0.043 | 0.020 | 1.106 | 1.016 | 1.203 | 2.302 | 0.890 | 0.006 | 0.014 | 0.672 |
| MAP1LC3A | 29 | -0.070 | 0.017 | 0.000 | 0.932 | 0.902 | 0.963 | 23.484 | 0.708 | 0.003 | 0.006 | 0.576 |
| MAP3K1 | 17 | 0.087 | 0.035 | 0.012 | 1.091 | 1.019 | 1.168 | 13.908 | 0.606 | 0.001 | 0.008 | 0.906 |
| MAP3K5 | 24 | 0.048 | 0.015 | 0.002 | 1.049 | 1.018 | 1.081 | 19.094 | 0.696 | -0.002 | 0.007 | 0.762 |
| MAP3K6 | 33 | 0.064 | 0.024 | 0.008 | 1.066 | 1.017 | 1.117 | 45.625 | 0.056 | 0.011 | 0.006 | 0.073 |
| MAP4K5 | 6 | 0.176 | 0.070 | 0.012 | 1.193 | 1.040 | 1.368 | 1.152 | 0.949 | 0.006 | 0.032 | 0.858 |
| MAPK3 | 55 | -0.084 | 0.014 | 0.000 | 0.919 | 0.895 | 0.944 | 71.094 | 0.059 | -0.010 | 0.006 | 0.127 |
| MAPK9 | 30 | 0.108 | 0.024 | 0.000 | 1.114 | 1.062 | 1.168 | 23.132 | 0.770 | 0.003 | 0.006 | 0.637 |
| MARCH10 | 5 | -0.166 | 0.073 | 0.023 | 0.847 | 0.733 | 0.978 | 4.260 | 0.372 | 0.003 | 0.015 | 0.836 |
| MARCH6 | 20 | 0.043 | 0.021 | 0.038 | 1.044 | 1.002 | 1.088 | 21.409 | 0.315 | 0.003 | 0.007 | 0.706 |
| MARS | 7 | -0.092 | 0.039 | 0.020 | 0.912 | 0.844 | 0.985 | 4.403 | 0.622 | -0.023 | 0.018 | 0.269 |
| MARS2 | 13 | 0.104 | 0.048 | 0.030 | 1.110 | 1.010 | 1.220 | 17.637 | 0.127 | 0.003 | 0.015 | 0.833 |
| MAST4-AS1 | 5 | -0.066 | 0.027 | 0.016 | 0.936 | 0.887 | 0.988 | 4.478 | 0.345 | 0.012 | 0.032 | 0.734 |
| MAX | 16 | -0.071 | 0.031 | 0.024 | 0.932 | 0.876 | 0.991 | 16.299 | 0.362 | -0.014 | 0.009 | 0.111 |
| MB21D1 | 16 | -0.072 | 0.032 | 0.025 | 0.931 | 0.875 | 0.991 | 14.214 | 0.509 | -0.008 | 0.009 | 0.409 |
| MB21D2 | 12 | -0.080 | 0.035 | 0.021 | 0.923 | 0.862 | 0.988 | 8.372 | 0.680 | -0.003 | 0.010 | 0.767 |
| MBLAC2 | 5 | -0.157 | 0.077 | 0.042 | 0.855 | 0.735 | 0.994 | 3.459 | 0.484 | -0.022 | 0.018 | 0.310 |
| MBOAT7 | 9 | 0.169 | 0.059 | 0.004 | 1.184 | 1.054 | 1.329 | 11.977 | 0.152 | 0.026 | 0.016 | 0.158 |
| MBP | 50 | 0.031 | 0.014 | 0.028 | 1.032 | 1.003 | 1.061 | 46.646 | 0.569 | 0.000 | 0.005 | 0.935 |
| MCC | 21 | 0.087 | 0.027 | 0.001 | 1.090 | 1.035 | 1.149 | 12.379 | 0.902 | 0.010 | 0.010 | 0.367 |
| MCFD2 | 27 | 0.088 | 0.024 | 0.000 | 1.092 | 1.042 | 1.144 | 25.296 | 0.502 | -0.011 | 0.006 | 0.071 |
| MCM6 | 47 | -0.042 | 0.017 | 0.016 | 0.959 | 0.927 | 0.992 | 62.701 | 0.051 | -0.006 | 0.006 | 0.349 |
| ME3 | 47 | -0.028 | 0.013 | 0.038 | 0.973 | 0.948 | 0.998 | 39.290 | 0.747 | -0.002 | 0.004 | 0.600 |
| MED11 | 4 | -0.218 | 0.110 | 0.048 | 0.804 | 0.648 | 0.998 | 6.293 | 0.098 | -0.057 | 0.026 | 0.157 |
| MED28 | 11 | -0.072 | 0.036 | 0.048 | 0.931 | 0.867 | 0.999 | 10.853 | 0.369 | -0.011 | 0.016 | 0.511 |
| MED29 | 7 | -0.101 | 0.042 | 0.015 | 0.904 | 0.833 | 0.981 | 3.759 | 0.709 | -0.005 | 0.016 | 0.784 |
| MEGF9 | 36 | 0.072 | 0.017 | 0.000 | 1.075 | 1.040 | 1.110 | 21.683 | 0.962 | 0.011 | 0.007 | 0.120 |
| MEI1 | 28 | -0.037 | 0.019 | 0.049 | 0.964 | 0.929 | 1.000 | 22.646 | 0.704 | 0.000 | 0.007 | 0.956 |
| METTL10 | 16 | -0.078 | 0.034 | 0.021 | 0.925 | 0.865 | 0.988 | 13.631 | 0.554 | 0.012 | 0.010 | 0.281 |
| METTL21D | 26 | -0.036 | 0.018 | 0.048 | 0.965 | 0.931 | 1.000 | 22.773 | 0.591 | -0.011 | 0.007 | 0.123 |
| MEX3B | 3 | 0.230 | 0.116 | 0.047 | 1.259 | 1.003 | 1.580 | 2.928 | 0.231 | 0.034 | 0.034 | 0.504 |
| MFSD10 | 20 | 0.156 | 0.046 | 0.001 | 1.169 | 1.067 | 1.280 | 29.079 | 0.065 | -0.001 | 0.010 | 0.928 |
| MFSD5 | 20 | -0.073 | 0.028 | 0.009 | 0.930 | 0.880 | 0.982 | 19.588 | 0.420 | -0.005 | 0.008 | 0.551 |
| MGAT1 | 18 | -0.073 | 0.027 | 0.007 | 0.929 | 0.882 | 0.980 | 16.422 | 0.494 | -0.015 | 0.008 | 0.063 |
| MGST3 | 60 | -0.019 | 0.009 | 0.033 | 0.981 | 0.964 | 0.998 | 57.418 | 0.534 | -0.004 | 0.004 | 0.392 |
| MIAT | 37 | 0.056 | 0.012 | 0.000 | 1.058 | 1.033 | 1.084 | 26.381 | 0.880 | -0.002 | 0.006 | 0.747 |
| MICE | 7 | -0.039 | 0.017 | 0.023 | 0.961 | 0.929 | 0.994 | 5.978 | 0.426 | 0.006 | 0.021 | 0.790 |
| MIDN | 3 | 0.200 | 0.074 | 0.007 | 1.221 | 1.056 | 1.411 | 0.399 | 0.819 | 0.010 | 0.026 | 0.766 |
| MIR3176 | 5 | -0.046 | 0.021 | 0.025 | 0.955 | 0.916 | 0.994 | 3.940 | 0.414 | -0.012 | 0.016 | 0.508 |
| MKNK1-AS1 | 13 | -0.037 | 0.017 | 0.025 | 0.963 | 0.932 | 0.995 | 13.778 | 0.315 | -0.015 | 0.010 | 0.138 |
| MKNK1 | 21 | -0.052 | 0.024 | 0.028 | 0.949 | 0.906 | 0.994 | 21.960 | 0.343 | -0.013 | 0.007 | 0.079 |
| MLF1IP | 17 | -0.040 | 0.014 | 0.004 | 0.961 | 0.935 | 0.988 | 10.973 | 0.811 | -0.007 | 0.009 | 0.468 |
| MLLT3 | 5 | -0.171 | 0.080 | 0.033 | 0.843 | 0.721 | 0.986 | 2.553 | 0.635 | -0.031 | 0.032 | 0.398 |
| MLLT6 | 4 | 0.119 | 0.051 | 0.021 | 1.126 | 1.018 | 1.245 | 0.440 | 0.932 | 0.001 | 0.017 | 0.969 |
| MMAB | 17 | -0.168 | 0.036 | 0.000 | 0.845 | 0.787 | 0.908 | 7.276 | 0.968 | 0.001 | 0.011 | 0.934 |
| MMP25 | 26 | 0.030 | 0.014 | 0.034 | 1.031 | 1.002 | 1.060 | 27.598 | 0.327 | 0.005 | 0.006 | 0.393 |
| MOK | 9 | -0.129 | 0.044 | 0.003 | 0.879 | 0.807 | 0.957 | 4.201 | 0.839 | -0.009 | 0.012 | 0.450 |
| MORN1 | 12 | -0.135 | 0.046 | 0.003 | 0.874 | 0.798 | 0.957 | 12.670 | 0.315 | 0.005 | 0.015 | 0.749 |
| MPC1 | 32 | 0.053 | 0.021 | 0.010 | 1.055 | 1.013 | 1.098 | 41.919 | 0.091 | -0.009 | 0.007 | 0.200 |
| MPHOSPH10 | 6 | -0.174 | 0.086 | 0.043 | 0.840 | 0.710 | 0.994 | 2.472 | 0.781 | -0.023 | 0.026 | 0.431 |
| MPHOSPH9 | 8 | -0.123 | 0.043 | 0.004 | 0.884 | 0.813 | 0.962 | 9.602 | 0.212 | 0.026 | 0.019 | 0.219 |
| MPND | 11 | 0.095 | 0.029 | 0.001 | 1.100 | 1.040 | 1.164 | 6.954 | 0.730 | 0.001 | 0.013 | 0.914 |
| MRPL10 | 20 | 0.080 | 0.034 | 0.019 | 1.083 | 1.013 | 1.158 | 23.028 | 0.236 | 0.002 | 0.011 | 0.867 |
| MRPL28 | 5 | -0.177 | 0.072 | 0.014 | 0.838 | 0.728 | 0.965 | 1.845 | 0.764 | 0.002 | 0.019 | 0.917 |
| MRPL35 | 18 | -0.061 | 0.024 | 0.012 | 0.940 | 0.896 | 0.987 | 18.791 | 0.341 | 0.000 | 0.007 | 0.990 |
| MRPL42 | 32 | 0.063 | 0.022 | 0.004 | 1.065 | 1.020 | 1.111 | 34.517 | 0.303 | 0.005 | 0.008 | 0.519 |
| MRPL48 | 27 | 0.038 | 0.015 | 0.013 | 1.038 | 1.008 | 1.070 | 21.380 | 0.722 | 0.008 | 0.006 | 0.217 |
| MRPS7 | 41 | 0.035 | 0.016 | 0.026 | 1.036 | 1.004 | 1.069 | 24.482 | 0.975 | 0.004 | 0.005 | 0.423 |
| MRVI1 | 41 | -0.043 | 0.016 | 0.007 | 0.958 | 0.929 | 0.988 | 45.503 | 0.254 | -0.005 | 0.005 | 0.390 |
| MS4A14 | 50 | -0.039 | 0.011 | 0.001 | 0.962 | 0.941 | 0.983 | 45.824 | 0.603 | -0.008 | 0.005 | 0.080 |
| MSI2 | 7 | -0.253 | 0.101 | 0.013 | 0.777 | 0.637 | 0.948 | 7.529 | 0.275 | 0.012 | 0.029 | 0.690 |
| MSLN | 7 | 0.126 | 0.042 | 0.002 | 1.134 | 1.045 | 1.231 | 2.828 | 0.830 | 0.003 | 0.009 | 0.735 |
| MSTO1 | 3 | 0.188 | 0.089 | 0.035 | 1.207 | 1.013 | 1.437 | 1.819 | 0.403 | 0.028 | 0.022 | 0.422 |
| MTCH2 | 4 | -0.396 | 0.106 | 0.000 | 0.673 | 0.547 | 0.829 | 4.912 | 0.178 | 0.050 | 0.023 | 0.165 |
| MTF1 | 3 | -0.191 | 0.080 | 0.017 | 0.826 | 0.705 | 0.967 | 1.662 | 0.436 | 0.031 | 0.112 | 0.830 |
| MTHFD1 | 9 | 0.068 | 0.033 | 0.039 | 1.071 | 1.003 | 1.142 | 4.855 | 0.773 | 0.011 | 0.016 | 0.510 |
| MTHFD2 | 9 | 0.102 | 0.045 | 0.025 | 1.107 | 1.013 | 1.210 | 10.239 | 0.249 | -0.005 | 0.015 | 0.762 |
| MTHFR | 51 | 0.032 | 0.012 | 0.007 | 1.032 | 1.009 | 1.056 | 52.682 | 0.371 | -0.002 | 0.005 | 0.631 |
| MTHFSD | 25 | -0.063 | 0.022 | 0.004 | 0.939 | 0.900 | 0.980 | 27.877 | 0.265 | -0.003 | 0.007 | 0.652 |
| MTL5 | 19 | -0.075 | 0.028 | 0.008 | 0.928 | 0.879 | 0.980 | 20.809 | 0.289 | -0.003 | 0.009 | 0.710 |
| MTMR9LP | 7 | 0.074 | 0.034 | 0.032 | 1.076 | 1.006 | 1.151 | 6.585 | 0.361 | -0.016 | 0.020 | 0.454 |
| MTO1 | 32 | -0.053 | 0.021 | 0.011 | 0.949 | 0.911 | 0.988 | 40.475 | 0.119 | 0.011 | 0.006 | 0.075 |
| MTRR | 42 | 0.028 | 0.010 | 0.007 | 1.028 | 1.008 | 1.049 | 30.060 | 0.896 | 0.005 | 0.005 | 0.336 |
| MTUS1 | 44 | -0.048 | 0.014 | 0.001 | 0.953 | 0.927 | 0.980 | 59.189 | 0.051 | -0.006 | 0.005 | 0.236 |
| MUC1 | 15 | -0.140 | 0.042 | 0.001 | 0.869 | 0.801 | 0.944 | 9.869 | 0.772 | -0.003 | 0.007 | 0.680 |
| MUSTN1 | 9 | -0.086 | 0.036 | 0.017 | 0.918 | 0.855 | 0.985 | 4.078 | 0.850 | -0.007 | 0.012 | 0.560 |
| MVB12B | 50 | 0.045 | 0.015 | 0.004 | 1.046 | 1.015 | 1.077 | 47.994 | 0.514 | 0.001 | 0.005 | 0.865 |
| MVD | 16 | -0.099 | 0.035 | 0.004 | 0.905 | 0.846 | 0.969 | 13.056 | 0.598 | 0.010 | 0.009 | 0.272 |
| MVK | 4 | -0.258 | 0.088 | 0.003 | 0.772 | 0.650 | 0.917 | 2.416 | 0.491 | -0.008 | 0.029 | 0.797 |
| MVP | 15 | 0.144 | 0.042 | 0.001 | 1.155 | 1.063 | 1.255 | 18.522 | 0.184 | 0.011 | 0.010 | 0.279 |
| MYH7B | 6 | -0.186 | 0.083 | 0.025 | 0.831 | 0.706 | 0.977 | 4.425 | 0.490 | -0.030 | 0.024 | 0.281 |
| MYO16-AS1 | 26 | 0.020 | 0.010 | 0.048 | 1.020 | 1.000 | 1.040 | 23.609 | 0.542 | 0.006 | 0.007 | 0.410 |
| MYO16 | 26 | -0.071 | 0.017 | 0.000 | 0.931 | 0.900 | 0.963 | 24.654 | 0.482 | 0.010 | 0.006 | 0.115 |
| MYO19 | 6 | 0.112 | 0.057 | 0.049 | 1.118 | 1.000 | 1.251 | 1.162 | 0.948 | -0.030 | 0.036 | 0.447 |
| MYO5A | 21 | -0.054 | 0.025 | 0.032 | 0.947 | 0.901 | 0.995 | 16.466 | 0.687 | -0.008 | 0.006 | 0.180 |
| MYO7B | 18 | 0.080 | 0.036 | 0.026 | 1.083 | 1.009 | 1.163 | 25.582 | 0.082 | 0.015 | 0.008 | 0.082 |
| NAA60 | 18 | -0.083 | 0.027 | 0.002 | 0.920 | 0.873 | 0.970 | 25.358 | 0.087 | 0.007 | 0.011 | 0.518 |
| NABP1 | 6 | 0.155 | 0.061 | 0.012 | 1.167 | 1.035 | 1.317 | 2.981 | 0.703 | 0.013 | 0.021 | 0.563 |
| NADKD1 | 5 | -0.223 | 0.060 | 0.000 | 0.800 | 0.710 | 0.901 | 1.755 | 0.781 | -0.019 | 0.028 | 0.556 |
| NAGPA | 38 | 0.033 | 0.017 | 0.049 | 1.034 | 1.000 | 1.069 | 41.188 | 0.292 | 0.006 | 0.007 | 0.385 |
| NANP | 30 | 0.066 | 0.025 | 0.007 | 1.068 | 1.018 | 1.121 | 41.921 | 0.057 | -0.015 | 0.012 | 0.243 |
| NAPSA | 6 | -0.097 | 0.042 | 0.019 | 0.907 | 0.836 | 0.984 | 2.213 | 0.819 | 0.015 | 0.021 | 0.514 |
| NAPSB | 81 | -0.029 | 0.010 | 0.004 | 0.971 | 0.952 | 0.990 | 100.693 | 0.059 | 0.001 | 0.004 | 0.859 |
| NBN | 34 | -0.053 | 0.024 | 0.027 | 0.948 | 0.905 | 0.994 | 30.386 | 0.598 | -0.007 | 0.009 | 0.400 |
| NBPF1 | 30 | -0.071 | 0.020 | 0.000 | 0.931 | 0.895 | 0.969 | 15.483 | 0.981 | 0.002 | 0.006 | 0.780 |
| NBR2 | 25 | -0.073 | 0.024 | 0.002 | 0.929 | 0.887 | 0.974 | 17.315 | 0.835 | 0.008 | 0.010 | 0.401 |
| NCALD | 28 | -0.106 | 0.024 | 0.000 | 0.899 | 0.857 | 0.943 | 22.955 | 0.687 | -0.005 | 0.006 | 0.408 |
| NCAM1 | 11 | 0.092 | 0.042 | 0.028 | 1.096 | 1.010 | 1.190 | 12.077 | 0.280 | 0.013 | 0.007 | 0.088 |
| NCK1 | 4 | 0.242 | 0.088 | 0.006 | 1.274 | 1.071 | 1.515 | 2.592 | 0.459 | 0.010 | 0.026 | 0.740 |
| NCKAP1L | 8 | 0.110 | 0.054 | 0.043 | 1.116 | 1.003 | 1.241 | 5.777 | 0.566 | 0.015 | 0.013 | 0.298 |
| NCOA2 | 3 | -0.410 | 0.098 | 0.000 | 0.663 | 0.548 | 0.804 | 1.917 | 0.383 | -0.021 | 0.028 | 0.595 |
| NCOA5 | 3 | 0.314 | 0.149 | 0.036 | 1.368 | 1.021 | 1.834 | 1.297 | 0.523 | -0.011 | 0.044 | 0.846 |
| NCOA7 | 17 | -0.080 | 0.030 | 0.007 | 0.923 | 0.870 | 0.978 | 11.186 | 0.798 | -0.008 | 0.012 | 0.507 |
| NDFIP1 | 25 | -0.077 | 0.027 | 0.005 | 0.926 | 0.877 | 0.977 | 24.071 | 0.458 | -0.014 | 0.008 | 0.077 |
| NDUFA13 | 3 | -0.187 | 0.079 | 0.018 | 0.830 | 0.711 | 0.968 | 0.241 | 0.886 | -0.002 | 0.014 | 0.920 |
| NDUFA2 | 25 | 0.038 | 0.019 | 0.046 | 1.038 | 1.001 | 1.077 | 22.548 | 0.547 | -0.004 | 0.008 | 0.626 |
| NDUFA6 | 28 | 0.049 | 0.018 | 0.007 | 1.050 | 1.013 | 1.087 | 22.024 | 0.736 | 0.009 | 0.006 | 0.118 |
| NDUFA7 | 21 | 0.077 | 0.023 | 0.001 | 1.080 | 1.033 | 1.130 | 18.586 | 0.549 | 0.006 | 0.007 | 0.422 |
| NDUFAF1 | 13 | -0.063 | 0.025 | 0.011 | 0.938 | 0.894 | 0.986 | 12.855 | 0.380 | 0.004 | 0.011 | 0.743 |
| NDUFAF5 | 25 | -0.070 | 0.021 | 0.001 | 0.932 | 0.896 | 0.971 | 28.055 | 0.258 | -0.001 | 0.006 | 0.829 |
| NDUFB10 | 6 | -0.124 | 0.046 | 0.007 | 0.883 | 0.807 | 0.967 | 5.982 | 0.308 | 0.001 | 0.015 | 0.936 |
| NDUFB2 | 19 | 0.060 | 0.025 | 0.016 | 1.062 | 1.011 | 1.115 | 18.343 | 0.433 | 0.005 | 0.007 | 0.542 |
| NDUFB9 | 6 | 0.080 | 0.040 | 0.043 | 1.084 | 1.002 | 1.172 | 1.979 | 0.852 | 0.003 | 0.013 | 0.804 |
| NDUFS5 | 55 | -0.035 | 0.012 | 0.005 | 0.966 | 0.943 | 0.990 | 46.003 | 0.772 | 0.000 | 0.005 | 0.993 |
| NEDD4 | 24 | -0.042 | 0.018 | 0.018 | 0.959 | 0.927 | 0.993 | 20.138 | 0.634 | -0.004 | 0.006 | 0.539 |
| NEDD9 | 9 | -0.098 | 0.046 | 0.032 | 0.907 | 0.829 | 0.992 | 4.765 | 0.782 | -0.005 | 0.011 | 0.641 |
| NEFL | 7 | -0.122 | 0.043 | 0.005 | 0.885 | 0.813 | 0.963 | 4.667 | 0.587 | 0.015 | 0.018 | 0.456 |
| NEK11 | 17 | 0.072 | 0.028 | 0.010 | 1.075 | 1.017 | 1.135 | 15.665 | 0.477 | -0.002 | 0.009 | 0.834 |
| NFE2L1 | 12 | 0.115 | 0.030 | 0.000 | 1.122 | 1.057 | 1.190 | 8.946 | 0.627 | 0.026 | 0.013 | 0.070 |
| NFE2L3 | 25 | 0.056 | 0.017 | 0.001 | 1.058 | 1.024 | 1.093 | 21.739 | 0.595 | 0.012 | 0.006 | 0.062 |
| NFYC | 12 | -0.120 | 0.039 | 0.002 | 0.887 | 0.823 | 0.957 | 7.583 | 0.750 | 0.006 | 0.010 | 0.553 |
| NICN1 | 22 | 0.051 | 0.026 | 0.047 | 1.052 | 1.001 | 1.107 | 20.071 | 0.517 | -0.004 | 0.010 | 0.686 |
| NINJ2 | 26 | 0.042 | 0.017 | 0.015 | 1.043 | 1.008 | 1.079 | 27.520 | 0.330 | -0.003 | 0.006 | 0.644 |
| NIPA1 | 11 | 0.126 | 0.045 | 0.005 | 1.135 | 1.039 | 1.239 | 8.798 | 0.551 | 0.002 | 0.021 | 0.917 |
| NKD1 | 3 | -0.343 | 0.115 | 0.003 | 0.710 | 0.566 | 0.890 | 2.915 | 0.233 | 0.005 | 0.057 | 0.946 |
| NLRC5 | 23 | 0.039 | 0.016 | 0.014 | 1.039 | 1.008 | 1.072 | 18.041 | 0.704 | 0.004 | 0.008 | 0.623 |
| NMB | 29 | 0.087 | 0.027 | 0.001 | 1.091 | 1.035 | 1.150 | 35.325 | 0.161 | 0.002 | 0.006 | 0.734 |
| NME3 | 9 | -0.109 | 0.042 | 0.010 | 0.897 | 0.826 | 0.975 | 5.028 | 0.755 | -0.002 | 0.016 | 0.890 |
| NMRAL1 | 48 | 0.035 | 0.013 | 0.009 | 1.035 | 1.009 | 1.063 | 47.521 | 0.451 | -0.003 | 0.005 | 0.550 |
| NOC3L | 27 | 0.096 | 0.027 | 0.000 | 1.101 | 1.044 | 1.160 | 31.136 | 0.223 | 0.000 | 0.007 | 0.978 |
| NOM1 | 17 | 0.086 | 0.033 | 0.010 | 1.090 | 1.021 | 1.163 | 20.972 | 0.180 | -0.011 | 0.009 | 0.262 |
| NOP10 | 33 | 0.033 | 0.014 | 0.016 | 1.034 | 1.006 | 1.062 | 25.407 | 0.789 | 0.007 | 0.006 | 0.211 |
| NOP14 | 6 | 0.209 | 0.076 | 0.006 | 1.233 | 1.063 | 1.431 | 3.251 | 0.661 | 0.012 | 0.017 | 0.495 |
| NOP56 | 15 | -0.052 | 0.025 | 0.040 | 0.949 | 0.903 | 0.998 | 10.747 | 0.706 | -0.001 | 0.007 | 0.879 |
| NPEPPS | 13 | -0.098 | 0.047 | 0.039 | 0.907 | 0.827 | 0.995 | 4.848 | 0.963 | 0.006 | 0.012 | 0.633 |
| NPHP3 | 64 | 0.053 | 0.013 | 0.000 | 1.054 | 1.027 | 1.082 | 50.024 | 0.882 | 0.007 | 0.005 | 0.115 |
| NPIP | 45 | -0.022 | 0.007 | 0.002 | 0.978 | 0.964 | 0.992 | 32.030 | 0.910 | -0.009 | 0.006 | 0.124 |
| NPPA-AS1 | 22 | 0.040 | 0.015 | 0.007 | 1.041 | 1.011 | 1.071 | 14.259 | 0.858 | 0.007 | 0.007 | 0.341 |
| NR1D2 | 6 | 0.165 | 0.063 | 0.009 | 1.180 | 1.042 | 1.335 | 5.124 | 0.401 | 0.024 | 0.014 | 0.168 |
| NR2F6 | 56 | -0.040 | 0.014 | 0.005 | 0.961 | 0.935 | 0.988 | 67.517 | 0.120 | 0.001 | 0.005 | 0.881 |
| NRBP2 | 13 | 0.101 | 0.038 | 0.008 | 1.106 | 1.027 | 1.191 | 18.392 | 0.104 | 0.014 | 0.011 | 0.213 |
| NRDE2 | 21 | -0.046 | 0.020 | 0.020 | 0.955 | 0.918 | 0.993 | 12.400 | 0.902 | 0.011 | 0.009 | 0.255 |
| NRM | 3 | -0.517 | 0.152 | 0.001 | 0.596 | 0.443 | 0.803 | 0.194 | 0.907 | 0.000 | 0.019 | 0.986 |
| NT5C3 | 5 | 0.102 | 0.041 | 0.012 | 1.107 | 1.022 | 1.199 | 3.838 | 0.428 | -0.029 | 0.020 | 0.240 |
| NT5DC1 | 20 | 0.121 | 0.036 | 0.001 | 1.129 | 1.052 | 1.212 | 17.844 | 0.533 | 0.018 | 0.011 | 0.117 |
| NT5DC3 | 64 | -0.019 | 0.010 | 0.049 | 0.981 | 0.963 | 1.000 | 64.832 | 0.413 | 0.001 | 0.004 | 0.704 |
| NUCB1-AS1 | 4 | -0.066 | 0.032 | 0.038 | 0.936 | 0.879 | 0.996 | 2.208 | 0.530 | -0.007 | 0.017 | 0.715 |
| NUCB1 | 27 | -0.033 | 0.016 | 0.038 | 0.967 | 0.937 | 0.998 | 15.657 | 0.944 | 0.001 | 0.006 | 0.923 |
| NUDCD3 | 20 | -0.055 | 0.028 | 0.044 | 0.946 | 0.896 | 0.999 | 14.738 | 0.739 | -0.011 | 0.007 | 0.122 |
| NUDT17 | 7 | -0.164 | 0.065 | 0.011 | 0.849 | 0.747 | 0.963 | 3.540 | 0.739 | -0.003 | 0.019 | 0.867 |
| NUDT2 | 76 | -0.017 | 0.007 | 0.017 | 0.983 | 0.970 | 0.997 | 76.479 | 0.431 | -0.001 | 0.004 | 0.724 |
| NUDT7 | 44 | 0.052 | 0.010 | 0.000 | 1.053 | 1.032 | 1.075 | 38.444 | 0.669 | -0.008 | 0.004 | 0.072 |
| NUFIP2 | 21 | 0.057 | 0.027 | 0.034 | 1.059 | 1.004 | 1.116 | 24.639 | 0.216 | -0.005 | 0.007 | 0.522 |
| NUMA1 | 10 | 0.097 | 0.041 | 0.019 | 1.101 | 1.016 | 1.194 | 9.947 | 0.355 | 0.010 | 0.012 | 0.462 |
| NUMBL | 3 | -0.305 | 0.098 | 0.002 | 0.737 | 0.609 | 0.893 | 0.857 | 0.651 | 0.022 | 0.025 | 0.536 |
| NUP43 | 69 | 0.025 | 0.012 | 0.036 | 1.025 | 1.002 | 1.049 | 79.350 | 0.163 | 0.006 | 0.004 | 0.132 |
| NUP54 | 14 | -0.091 | 0.037 | 0.013 | 0.913 | 0.850 | 0.981 | 10.001 | 0.694 | -0.003 | 0.010 | 0.753 |
| NUP62 | 11 | -0.089 | 0.031 | 0.004 | 0.915 | 0.861 | 0.972 | 8.058 | 0.623 | -0.003 | 0.009 | 0.722 |
| NUP85 | 47 | -0.041 | 0.015 | 0.004 | 0.959 | 0.933 | 0.987 | 41.853 | 0.647 | -0.008 | 0.006 | 0.180 |
| NYNRIN | 11 | -0.085 | 0.037 | 0.020 | 0.918 | 0.855 | 0.986 | 4.323 | 0.932 | -0.001 | 0.009 | 0.914 |
| OBFC1 | 8 | -0.072 | 0.036 | 0.045 | 0.931 | 0.867 | 0.998 | 5.837 | 0.559 | -0.039 | 0.029 | 0.222 |
| OLIG1 | 49 | 0.028 | 0.013 | 0.033 | 1.028 | 1.002 | 1.054 | 51.576 | 0.336 | -0.001 | 0.005 | 0.764 |
| OPRL1 | 39 | -0.033 | 0.015 | 0.030 | 0.968 | 0.940 | 0.997 | 44.184 | 0.227 | -0.003 | 0.007 | 0.660 |
| OR2A9P | 24 | -0.044 | 0.012 | 0.000 | 0.957 | 0.935 | 0.980 | 23.909 | 0.409 | -0.007 | 0.007 | 0.318 |
| ORC5 | 3 | -0.222 | 0.092 | 0.016 | 0.801 | 0.669 | 0.960 | 1.706 | 0.426 | 0.060 | 0.121 | 0.704 |
| ORM2 | 33 | -0.049 | 0.019 | 0.010 | 0.952 | 0.917 | 0.988 | 33.082 | 0.414 | -0.003 | 0.006 | 0.558 |
| OSBPL7 | 5 | 0.250 | 0.094 | 0.008 | 1.285 | 1.069 | 1.544 | 7.161 | 0.128 | 0.018 | 0.027 | 0.551 |
| OSGIN1 | 29 | 0.067 | 0.027 | 0.015 | 1.069 | 1.013 | 1.128 | 15.725 | 0.970 | 0.000 | 0.006 | 0.939 |
| OTUD3 | 11 | -0.091 | 0.039 | 0.021 | 0.913 | 0.845 | 0.986 | 5.622 | 0.846 | -0.006 | 0.012 | 0.651 |
| OTX1 | 29 | 0.051 | 0.022 | 0.023 | 1.052 | 1.007 | 1.100 | 35.564 | 0.154 | -0.001 | 0.007 | 0.850 |
| P2RY11 | 16 | 0.115 | 0.034 | 0.001 | 1.121 | 1.049 | 1.199 | 12.596 | 0.633 | 0.008 | 0.008 | 0.338 |
| P2RY14 | 23 | 0.082 | 0.025 | 0.001 | 1.086 | 1.033 | 1.141 | 13.822 | 0.908 | 0.007 | 0.007 | 0.329 |
| PABPC4 | 10 | -0.148 | 0.039 | 0.000 | 0.863 | 0.799 | 0.932 | 5.666 | 0.773 | -0.009 | 0.012 | 0.482 |
| PADI4 | 31 | 0.043 | 0.018 | 0.019 | 1.044 | 1.007 | 1.082 | 29.834 | 0.474 | 0.006 | 0.006 | 0.299 |
| PAFAH1B1 | 15 | -0.118 | 0.046 | 0.010 | 0.888 | 0.812 | 0.972 | 19.520 | 0.146 | -0.010 | 0.012 | 0.402 |
| PAFAH1B2 | 21 | 0.053 | 0.022 | 0.019 | 1.054 | 1.009 | 1.101 | 30.910 | 0.056 | 0.011 | 0.008 | 0.209 |
| PAFAH1B3 | 3 | 0.223 | 0.094 | 0.018 | 1.249 | 1.039 | 1.502 | 2.477 | 0.290 | 0.075 | 0.061 | 0.434 |
| PAFAH2 | 14 | 0.097 | 0.031 | 0.002 | 1.102 | 1.037 | 1.172 | 9.152 | 0.761 | 0.000 | 0.007 | 0.997 |
| PAK2 | 7 | -0.148 | 0.054 | 0.006 | 0.862 | 0.776 | 0.959 | 4.097 | 0.664 | -0.007 | 0.016 | 0.670 |
| PANK2 | 21 | -0.057 | 0.027 | 0.039 | 0.945 | 0.895 | 0.997 | 8.867 | 0.984 | -0.002 | 0.007 | 0.783 |
| PANK4 | 7 | 0.109 | 0.041 | 0.007 | 1.115 | 1.030 | 1.207 | 5.708 | 0.457 | -0.008 | 0.014 | 0.576 |
| PANX1 | 41 | -0.037 | 0.018 | 0.046 | 0.964 | 0.930 | 0.999 | 19.569 | 0.997 | 0.004 | 0.006 | 0.555 |
| PAOX | 16 | -0.146 | 0.034 | 0.000 | 0.864 | 0.808 | 0.923 | 14.373 | 0.497 | -0.011 | 0.009 | 0.274 |
| PAQR8 | 67 | 0.025 | 0.012 | 0.032 | 1.025 | 1.002 | 1.049 | 37.627 | 0.998 | -0.002 | 0.004 | 0.640 |
| PARD6G | 3 | -0.199 | 0.092 | 0.030 | 0.819 | 0.684 | 0.981 | 1.159 | 0.560 | 0.040 | 0.037 | 0.478 |
| PAXBP1 | 14 | 0.116 | 0.042 | 0.006 | 1.123 | 1.035 | 1.219 | 17.126 | 0.194 | 0.019 | 0.009 | 0.053 |
| PCGF2 | 13 | 0.084 | 0.037 | 0.024 | 1.088 | 1.011 | 1.171 | 10.104 | 0.607 | 0.001 | 0.009 | 0.932 |
| PCYOX1 | 12 | 0.113 | 0.046 | 0.014 | 1.120 | 1.023 | 1.225 | 9.394 | 0.586 | 0.001 | 0.010 | 0.909 |
| PDCD1 | 16 | -0.051 | 0.025 | 0.040 | 0.951 | 0.906 | 0.998 | 9.719 | 0.837 | -0.002 | 0.009 | 0.826 |
| PDCD1LG2 | 12 | 0.077 | 0.037 | 0.039 | 1.080 | 1.004 | 1.161 | 18.443 | 0.072 | 0.030 | 0.014 | 0.065 |
| PDE2A | 11 | 0.155 | 0.054 | 0.004 | 1.168 | 1.050 | 1.298 | 7.016 | 0.724 | -0.007 | 0.010 | 0.493 |
| PDE3B | 5 | 0.117 | 0.054 | 0.031 | 1.124 | 1.011 | 1.250 | 2.738 | 0.603 | -0.003 | 0.019 | 0.893 |
| PDE4DIP | 3 | 0.185 | 0.080 | 0.021 | 1.203 | 1.028 | 1.408 | 1.134 | 0.567 | -0.029 | 0.043 | 0.618 |
| PDE7A | 9 | -0.162 | 0.058 | 0.005 | 0.851 | 0.759 | 0.953 | 6.097 | 0.636 | 0.013 | 0.016 | 0.456 |
| PDE8A | 3 | 0.212 | 0.079 | 0.007 | 1.236 | 1.059 | 1.443 | 1.414 | 0.493 | 0.018 | 0.026 | 0.617 |
| PDE8B | 12 | -0.094 | 0.032 | 0.003 | 0.911 | 0.855 | 0.970 | 8.688 | 0.651 | 0.016 | 0.014 | 0.261 |
| PDF | 8 | -0.146 | 0.049 | 0.003 | 0.864 | 0.785 | 0.952 | 7.012 | 0.428 | 0.019 | 0.013 | 0.195 |
| PDHB | 25 | -0.079 | 0.022 | 0.000 | 0.924 | 0.885 | 0.966 | 24.941 | 0.409 | 0.000 | 0.007 | 0.984 |
| PDIA6 | 14 | -0.079 | 0.023 | 0.001 | 0.924 | 0.883 | 0.966 | 3.946 | 0.992 | 0.009 | 0.009 | 0.340 |
| PDK2 | 5 | -0.207 | 0.058 | 0.000 | 0.813 | 0.726 | 0.911 | 6.888 | 0.142 | -0.005 | 0.025 | 0.850 |
| PDLIM7 | 6 | -0.129 | 0.056 | 0.023 | 0.879 | 0.787 | 0.982 | 6.368 | 0.272 | 0.007 | 0.021 | 0.773 |
| PDPK2 | 5 | -0.030 | 0.014 | 0.034 | 0.970 | 0.944 | 0.998 | 4.837 | 0.304 | -0.006 | 0.022 | 0.806 |
| PDZK1IP1 | 51 | -0.021 | 0.011 | 0.047 | 0.979 | 0.959 | 1.000 | 39.114 | 0.867 | 0.007 | 0.004 | 0.104 |
| PEBP1 | 21 | 0.037 | 0.018 | 0.042 | 1.038 | 1.001 | 1.075 | 15.834 | 0.727 | 0.001 | 0.012 | 0.947 |
| PELI1 | 16 | -0.109 | 0.036 | 0.002 | 0.896 | 0.836 | 0.962 | 14.703 | 0.473 | -0.015 | 0.008 | 0.076 |
| PFAS | 12 | -0.087 | 0.043 | 0.046 | 0.917 | 0.842 | 0.999 | 18.313 | 0.075 | -0.009 | 0.011 | 0.420 |
| PFDN1 | 12 | 0.098 | 0.044 | 0.028 | 1.103 | 1.011 | 1.203 | 11.712 | 0.386 | -0.008 | 0.010 | 0.456 |
| PFKM | 20 | 0.124 | 0.037 | 0.001 | 1.132 | 1.053 | 1.218 | 24.238 | 0.187 | 0.004 | 0.012 | 0.752 |
| PGM2L1 | 18 | -0.075 | 0.030 | 0.012 | 0.928 | 0.875 | 0.984 | 13.225 | 0.721 | 0.015 | 0.009 | 0.116 |
| PHB | 5 | 0.241 | 0.095 | 0.011 | 1.272 | 1.057 | 1.532 | 5.759 | 0.218 | -0.040 | 0.022 | 0.157 |
| PHC2 | 7 | -0.152 | 0.057 | 0.007 | 0.859 | 0.769 | 0.960 | 6.702 | 0.349 | 0.016 | 0.023 | 0.518 |
| PHF11 | 42 | 0.052 | 0.023 | 0.025 | 1.054 | 1.007 | 1.103 | 40.885 | 0.476 | -0.003 | 0.007 | 0.705 |
| PHF19 | 25 | 0.089 | 0.025 | 0.000 | 1.093 | 1.040 | 1.148 | 21.969 | 0.581 | -0.007 | 0.012 | 0.567 |
| PHF23 | 14 | -0.074 | 0.035 | 0.035 | 0.928 | 0.866 | 0.995 | 11.271 | 0.588 | 0.003 | 0.008 | 0.750 |
| PHF5A | 3 | 0.183 | 0.069 | 0.008 | 1.201 | 1.050 | 1.374 | 0.211 | 0.900 | 0.016 | 0.039 | 0.747 |
| PHKG2 | 3 | -0.580 | 0.155 | 0.000 | 0.560 | 0.413 | 0.758 | 3.641 | 0.162 | -0.082 | 0.043 | 0.312 |
| PHOSPHO1 | 17 | -0.077 | 0.037 | 0.036 | 0.925 | 0.861 | 0.995 | 21.868 | 0.148 | -0.015 | 0.010 | 0.167 |
| PI4KAP2 | 16 | -0.034 | 0.015 | 0.021 | 0.966 | 0.938 | 0.995 | 5.882 | 0.982 | 0.002 | 0.010 | 0.832 |
| PIAS2 | 25 | -0.083 | 0.025 | 0.001 | 0.920 | 0.876 | 0.967 | 16.847 | 0.855 | -0.002 | 0.007 | 0.828 |
| PIAS4 | 12 | -0.108 | 0.051 | 0.034 | 0.898 | 0.812 | 0.992 | 14.753 | 0.194 | -0.015 | 0.012 | 0.252 |
| PIEZO1 | 41 | -0.031 | 0.016 | 0.049 | 0.970 | 0.941 | 1.000 | 40.743 | 0.438 | 0.000 | 0.005 | 0.978 |
| PIGN | 72 | -0.023 | 0.010 | 0.023 | 0.977 | 0.958 | 0.997 | 56.058 | 0.903 | 0.004 | 0.004 | 0.286 |
| PIGP | 62 | 0.031 | 0.011 | 0.005 | 1.031 | 1.009 | 1.053 | 65.427 | 0.326 | 0.005 | 0.004 | 0.251 |
| PIH1D1 | 11 | 0.078 | 0.034 | 0.021 | 1.081 | 1.012 | 1.156 | 6.805 | 0.744 | 0.009 | 0.010 | 0.381 |
| PIK3C2A | 31 | 0.086 | 0.015 | 0.000 | 1.090 | 1.058 | 1.123 | 23.903 | 0.776 | 0.007 | 0.008 | 0.398 |
| PILRA | 4 | -0.328 | 0.127 | 0.010 | 0.721 | 0.561 | 0.925 | 6.911 | 0.075 | 0.017 | 0.047 | 0.752 |
| PINK1 | 10 | -0.076 | 0.035 | 0.032 | 0.927 | 0.864 | 0.994 | 5.153 | 0.821 | -0.012 | 0.012 | 0.350 |
| PIP4K2B | 5 | 0.182 | 0.081 | 0.024 | 1.200 | 1.024 | 1.406 | 2.499 | 0.645 | 0.017 | 0.017 | 0.397 |
| PIWIL4 | 6 | -0.137 | 0.067 | 0.041 | 0.872 | 0.764 | 0.994 | 3.844 | 0.572 | 0.008 | 0.014 | 0.604 |
| PJA2 | 35 | -0.039 | 0.018 | 0.031 | 0.962 | 0.928 | 0.996 | 40.289 | 0.212 | -0.011 | 0.006 | 0.103 |
| PKIB | 15 | -0.082 | 0.031 | 0.008 | 0.921 | 0.867 | 0.979 | 12.484 | 0.567 | 0.011 | 0.010 | 0.293 |
| PKNOX1 | 26 | 0.059 | 0.027 | 0.028 | 1.061 | 1.006 | 1.117 | 13.129 | 0.975 | -0.009 | 0.007 | 0.202 |
| PLA2G4B | 37 | 0.044 | 0.021 | 0.033 | 1.045 | 1.004 | 1.088 | 38.304 | 0.365 | 0.008 | 0.007 | 0.238 |
| PLA2G4C | 66 | -0.021 | 0.009 | 0.015 | 0.979 | 0.963 | 0.996 | 74.474 | 0.197 | -0.003 | 0.004 | 0.445 |
| PLAC9 | 19 | 0.069 | 0.016 | 0.000 | 1.072 | 1.038 | 1.107 | 12.069 | 0.844 | -0.011 | 0.009 | 0.249 |
| PLAGL2 | 3 | -0.181 | 0.090 | 0.044 | 0.834 | 0.699 | 0.996 | 0.842 | 0.656 | -0.022 | 0.027 | 0.560 |
| PLCD1 | 15 | -0.072 | 0.034 | 0.033 | 0.930 | 0.871 | 0.994 | 10.660 | 0.713 | 0.002 | 0.009 | 0.839 |
| PLEKHH2 | 34 | 0.067 | 0.024 | 0.005 | 1.069 | 1.020 | 1.120 | 34.273 | 0.406 | -0.008 | 0.011 | 0.470 |
| PLK1S1 | 31 | 0.066 | 0.021 | 0.002 | 1.068 | 1.025 | 1.113 | 22.431 | 0.838 | 0.011 | 0.007 | 0.153 |
| PLTP | 58 | 0.043 | 0.013 | 0.001 | 1.044 | 1.017 | 1.072 | 50.795 | 0.706 | 0.012 | 0.006 | 0.059 |
| PLXDC2 | 15 | 0.087 | 0.044 | 0.047 | 1.091 | 1.001 | 1.188 | 13.917 | 0.456 | 0.002 | 0.011 | 0.864 |
| PLXNB2 | 18 | 0.101 | 0.026 | 0.000 | 1.107 | 1.052 | 1.165 | 18.966 | 0.330 | 0.005 | 0.012 | 0.672 |
| PM20D1 | 30 | -0.049 | 0.024 | 0.041 | 0.952 | 0.908 | 0.998 | 34.557 | 0.219 | -0.016 | 0.008 | 0.050 |
| PMEPA1 | 3 | -0.179 | 0.079 | 0.024 | 0.836 | 0.716 | 0.977 | 0.584 | 0.747 | -0.001 | 0.022 | 0.961 |
| PMM1 | 22 | 0.064 | 0.026 | 0.012 | 1.066 | 1.014 | 1.121 | 16.754 | 0.726 | -0.005 | 0.006 | 0.475 |
| PMS2P3 | 21 | -0.044 | 0.010 | 0.000 | 0.957 | 0.939 | 0.976 | 12.150 | 0.911 | 0.005 | 0.007 | 0.476 |
| PNMAL1 | 34 | -0.038 | 0.018 | 0.038 | 0.963 | 0.929 | 0.998 | 13.315 | 0.999 | 0.000 | 0.005 | 0.945 |
| PNMAL2 | 23 | -0.043 | 0.021 | 0.043 | 0.958 | 0.919 | 0.999 | 19.456 | 0.617 | 0.001 | 0.005 | 0.804 |
| PNPLA8 | 11 | -0.130 | 0.042 | 0.002 | 0.878 | 0.809 | 0.953 | 4.562 | 0.918 | -0.007 | 0.009 | 0.442 |
| POC5 | 36 | 0.034 | 0.016 | 0.040 | 1.034 | 1.001 | 1.068 | 28.103 | 0.789 | -0.001 | 0.005 | 0.845 |
| PODXL | 6 | 0.136 | 0.069 | 0.049 | 1.146 | 1.001 | 1.312 | 1.075 | 0.956 | 0.009 | 0.019 | 0.670 |
| POLB | 3 | -0.144 | 0.056 | 0.011 | 0.866 | 0.776 | 0.967 | 1.374 | 0.503 | 0.020 | 0.017 | 0.459 |
| POLM | 39 | 0.040 | 0.017 | 0.015 | 1.041 | 1.008 | 1.075 | 43.759 | 0.240 | 0.000 | 0.006 | 0.963 |
| POLR2C | 11 | -0.088 | 0.044 | 0.045 | 0.916 | 0.841 | 0.998 | 2.446 | 0.992 | -0.001 | 0.010 | 0.896 |
| POLR2E | 18 | 0.058 | 0.025 | 0.021 | 1.060 | 1.009 | 1.114 | 13.250 | 0.719 | 0.002 | 0.008 | 0.807 |
| POLR3H | 7 | 0.146 | 0.061 | 0.017 | 1.157 | 1.026 | 1.305 | 5.549 | 0.476 | -0.001 | 0.012 | 0.915 |
| POLR3K | 23 | -0.042 | 0.014 | 0.004 | 0.959 | 0.933 | 0.987 | 19.951 | 0.586 | 0.005 | 0.006 | 0.411 |
| POMC | 26 | -0.043 | 0.020 | 0.027 | 0.958 | 0.921 | 0.995 | 25.073 | 0.458 | -0.001 | 0.005 | 0.782 |
| POMT1 | 13 | -0.089 | 0.031 | 0.004 | 0.915 | 0.861 | 0.973 | 13.930 | 0.305 | 0.008 | 0.008 | 0.332 |
| POP5 | 20 | -0.098 | 0.029 | 0.001 | 0.907 | 0.856 | 0.961 | 18.749 | 0.473 | 0.008 | 0.008 | 0.341 |
| POPDC2 | 34 | -0.062 | 0.021 | 0.003 | 0.940 | 0.902 | 0.979 | 28.435 | 0.694 | -0.006 | 0.007 | 0.348 |
| POU5F1P3 | 4 | -0.063 | 0.023 | 0.007 | 0.939 | 0.896 | 0.983 | 1.722 | 0.632 | -0.004 | 0.012 | 0.773 |
| PPAP2C | 11 | -0.094 | 0.032 | 0.003 | 0.910 | 0.855 | 0.969 | 7.149 | 0.711 | 0.008 | 0.010 | 0.481 |
| PPIAP29 | 3 | 0.129 | 0.061 | 0.033 | 1.138 | 1.011 | 1.281 | 0.129 | 0.937 | -0.005 | 0.019 | 0.833 |
| PPIL2 | 7 | -0.095 | 0.047 | 0.044 | 0.910 | 0.830 | 0.997 | 4.892 | 0.558 | 0.021 | 0.016 | 0.250 |
| PPM1F | 39 | 0.036 | 0.015 | 0.016 | 1.036 | 1.007 | 1.067 | 28.140 | 0.879 | 0.006 | 0.006 | 0.290 |
| PPP1R11 | 3 | 0.130 | 0.060 | 0.031 | 1.138 | 1.012 | 1.280 | 1.186 | 0.553 | -0.017 | 0.019 | 0.532 |
| PPP1R13B | 5 | -0.229 | 0.103 | 0.027 | 0.796 | 0.650 | 0.975 | 7.782 | 0.100 | -0.034 | 0.013 | 0.075 |
| PPP1R14A | 21 | 0.095 | 0.027 | 0.001 | 1.100 | 1.042 | 1.161 | 16.502 | 0.685 | -0.004 | 0.007 | 0.516 |
| PPP1R26 | 3 | -0.183 | 0.086 | 0.033 | 0.833 | 0.703 | 0.985 | 0.802 | 0.670 | -0.063 | 0.072 | 0.540 |
| PPP2R1A | 9 | 0.145 | 0.066 | 0.027 | 1.156 | 1.016 | 1.315 | 14.156 | 0.078 | 0.003 | 0.016 | 0.882 |
| PPP2R2D | 8 | -0.096 | 0.043 | 0.025 | 0.909 | 0.836 | 0.988 | 9.584 | 0.213 | 0.006 | 0.020 | 0.787 |
| PPP2R3A | 3 | 0.296 | 0.106 | 0.005 | 1.344 | 1.091 | 1.655 | 2.341 | 0.310 | 0.038 | 0.027 | 0.387 |
| PPP4C | 14 | -0.130 | 0.043 | 0.003 | 0.878 | 0.806 | 0.956 | 18.022 | 0.157 | -0.012 | 0.016 | 0.472 |
| PPP4R4 | 25 | -0.056 | 0.028 | 0.044 | 0.945 | 0.895 | 0.999 | 19.923 | 0.701 | -0.001 | 0.008 | 0.884 |
| PPP6C | 5 | 0.262 | 0.061 | 0.000 | 1.300 | 1.153 | 1.466 | 3.848 | 0.427 | 0.018 | 0.020 | 0.420 |
| PPP6R2 | 7 | 0.178 | 0.070 | 0.011 | 1.195 | 1.042 | 1.370 | 3.108 | 0.795 | 0.009 | 0.014 | 0.564 |
| PQLC3 | 23 | 0.079 | 0.026 | 0.002 | 1.083 | 1.029 | 1.139 | 30.796 | 0.100 | 0.004 | 0.008 | 0.596 |
| PRC1 | 8 | -0.113 | 0.047 | 0.017 | 0.894 | 0.815 | 0.980 | 2.338 | 0.939 | -0.004 | 0.013 | 0.737 |
| PRDX3 | 15 | -0.058 | 0.027 | 0.033 | 0.944 | 0.895 | 0.995 | 17.524 | 0.229 | 0.016 | 0.011 | 0.192 |
| PRDX5 | 40 | -0.026 | 0.012 | 0.026 | 0.974 | 0.952 | 0.997 | 24.519 | 0.966 | -0.007 | 0.005 | 0.166 |
| PRDX6 | 26 | 0.104 | 0.024 | 0.000 | 1.110 | 1.058 | 1.165 | 35.855 | 0.074 | 0.013 | 0.010 | 0.212 |
| PREX1 | 7 | -0.117 | 0.047 | 0.012 | 0.890 | 0.812 | 0.975 | 2.569 | 0.861 | -0.009 | 0.013 | 0.507 |
| PRKAB1 | 45 | 0.066 | 0.016 | 0.000 | 1.068 | 1.035 | 1.102 | 45.851 | 0.395 | 0.007 | 0.004 | 0.152 |
| PRKCB | 54 | 0.050 | 0.015 | 0.001 | 1.051 | 1.021 | 1.083 | 62.213 | 0.181 | 0.000 | 0.006 | 0.949 |
| PRKCD | 10 | 0.086 | 0.041 | 0.037 | 1.090 | 1.005 | 1.182 | 5.985 | 0.741 | -0.013 | 0.013 | 0.345 |
| PRKXP1 | 35 | 0.019 | 0.008 | 0.017 | 1.019 | 1.003 | 1.035 | 29.064 | 0.708 | 0.001 | 0.006 | 0.885 |
| PRMT5 | 21 | -0.053 | 0.020 | 0.009 | 0.948 | 0.911 | 0.987 | 19.462 | 0.492 | 0.005 | 0.010 | 0.625 |
| PROSER1 | 7 | 0.110 | 0.055 | 0.046 | 1.117 | 1.002 | 1.245 | 4.166 | 0.654 | 0.017 | 0.014 | 0.294 |
| PRPF40A | 3 | 0.226 | 0.111 | 0.042 | 1.254 | 1.009 | 1.559 | 3.337 | 0.189 | 0.133 | 0.141 | 0.518 |
| PRPSAP1 | 7 | -0.128 | 0.052 | 0.015 | 0.880 | 0.794 | 0.975 | 5.737 | 0.453 | -0.015 | 0.022 | 0.508 |
| PRR24 | 44 | 0.036 | 0.015 | 0.014 | 1.037 | 1.007 | 1.067 | 36.031 | 0.765 | 0.004 | 0.006 | 0.483 |
| PRR4 | 41 | 0.040 | 0.018 | 0.025 | 1.041 | 1.005 | 1.078 | 48.427 | 0.169 | 0.002 | 0.006 | 0.769 |
| PRRC2B | 4 | -0.165 | 0.055 | 0.003 | 0.848 | 0.762 | 0.944 | 2.402 | 0.493 | 0.015 | 0.012 | 0.314 |
| PRSS21 | 11 | -0.120 | 0.055 | 0.029 | 0.887 | 0.797 | 0.988 | 13.372 | 0.204 | 0.024 | 0.014 | 0.132 |
| PRUNE2 | 90 | -0.016 | 0.008 | 0.050 | 0.984 | 0.969 | 1.000 | 72.805 | 0.894 | 0.001 | 0.003 | 0.701 |
| PRX | 11 | 0.088 | 0.034 | 0.009 | 1.092 | 1.022 | 1.168 | 6.477 | 0.774 | 0.005 | 0.010 | 0.620 |
| PSMB11 | 8 | 0.119 | 0.046 | 0.010 | 1.126 | 1.029 | 1.233 | 1.084 | 0.993 | -0.002 | 0.017 | 0.903 |
| PSMB3 | 21 | -0.054 | 0.020 | 0.006 | 0.947 | 0.912 | 0.984 | 15.144 | 0.768 | -0.003 | 0.009 | 0.735 |
| PSMB7 | 3 | 0.127 | 0.063 | 0.044 | 1.135 | 1.003 | 1.284 | 3.279 | 0.194 | -0.008 | 0.021 | 0.778 |
| PSMB8 | 4 | -0.064 | 0.027 | 0.016 | 0.938 | 0.890 | 0.988 | 2.413 | 0.491 | -0.006 | 0.013 | 0.667 |
| PSMC6 | 10 | -0.087 | 0.023 | 0.000 | 0.917 | 0.876 | 0.960 | 6.402 | 0.699 | -0.018 | 0.015 | 0.283 |
| PSMD2 | 10 | -0.066 | 0.029 | 0.022 | 0.936 | 0.885 | 0.990 | 5.009 | 0.834 | -0.020 | 0.019 | 0.332 |
| PSMD4 | 10 | 0.109 | 0.042 | 0.009 | 1.115 | 1.027 | 1.211 | 4.463 | 0.878 | -0.012 | 0.015 | 0.451 |
| PSMD5 | 13 | -0.117 | 0.037 | 0.002 | 0.890 | 0.827 | 0.957 | 10.909 | 0.537 | -0.020 | 0.011 | 0.094 |
| PSMD6-AS2 | 12 | -0.090 | 0.041 | 0.027 | 0.914 | 0.843 | 0.990 | 13.749 | 0.247 | 0.000 | 0.015 | 0.998 |
| PSMD8 | 3 | 0.164 | 0.074 | 0.026 | 1.178 | 1.020 | 1.362 | 1.254 | 0.534 | 0.017 | 0.017 | 0.493 |
| PSMD9 | 8 | 0.118 | 0.042 | 0.005 | 1.125 | 1.037 | 1.221 | 5.929 | 0.548 | 0.014 | 0.012 | 0.277 |
| PSMG1 | 11 | 0.105 | 0.039 | 0.007 | 1.110 | 1.029 | 1.198 | 9.617 | 0.475 | 0.001 | 0.012 | 0.945 |
| PSMG3-AS1 | 21 | 0.053 | 0.017 | 0.002 | 1.055 | 1.020 | 1.091 | 23.431 | 0.268 | -0.004 | 0.007 | 0.509 |
| PSTK | 14 | -0.064 | 0.032 | 0.047 | 0.938 | 0.881 | 0.999 | 10.634 | 0.641 | -0.015 | 0.010 | 0.154 |
| PSTPIP1 | 47 | -0.038 | 0.016 | 0.021 | 0.963 | 0.932 | 0.994 | 53.456 | 0.210 | -0.003 | 0.005 | 0.587 |
| PTGDS | 12 | 0.060 | 0.029 | 0.040 | 1.062 | 1.003 | 1.125 | 13.705 | 0.250 | 0.004 | 0.013 | 0.777 |
| PTGFR | 14 | -0.178 | 0.050 | 0.000 | 0.837 | 0.759 | 0.924 | 18.224 | 0.149 | -0.002 | 0.015 | 0.911 |
| PTGFRN | 7 | 0.128 | 0.058 | 0.027 | 1.137 | 1.015 | 1.274 | 10.062 | 0.122 | 0.012 | 0.015 | 0.467 |
| PTK7 | 4 | -0.149 | 0.062 | 0.015 | 0.862 | 0.764 | 0.972 | 0.643 | 0.886 | -0.008 | 0.016 | 0.683 |
| PTPRN | 13 | -0.071 | 0.029 | 0.016 | 0.932 | 0.880 | 0.987 | 10.821 | 0.544 | -0.002 | 0.010 | 0.812 |
| PUS3 | 26 | 0.070 | 0.025 | 0.005 | 1.073 | 1.022 | 1.126 | 27.573 | 0.328 | 0.000 | 0.007 | 0.965 |
| PVRIG | 21 | 0.083 | 0.015 | 0.000 | 1.087 | 1.056 | 1.119 | 16.671 | 0.674 | 0.009 | 0.006 | 0.182 |
| PYGB | 68 | 0.039 | 0.010 | 0.000 | 1.040 | 1.020 | 1.060 | 80.551 | 0.124 | 0.001 | 0.005 | 0.825 |
| QDPR | 64 | 0.031 | 0.009 | 0.000 | 1.032 | 1.014 | 1.050 | 60.891 | 0.552 | -0.004 | 0.004 | 0.387 |
| QRICH1 | 16 | 0.085 | 0.036 | 0.019 | 1.088 | 1.014 | 1.168 | 13.698 | 0.549 | -0.001 | 0.009 | 0.872 |
| RAB11FIP3 | 3 | -0.181 | 0.081 | 0.026 | 0.834 | 0.711 | 0.979 | 2.335 | 0.311 | 0.129 | 0.084 | 0.369 |
| RAB14 | 16 | -0.071 | 0.029 | 0.016 | 0.932 | 0.880 | 0.987 | 19.616 | 0.187 | -0.006 | 0.009 | 0.485 |
| RAB2B | 12 | -0.067 | 0.034 | 0.049 | 0.935 | 0.875 | 1.000 | 6.710 | 0.822 | -0.011 | 0.008 | 0.197 |
| RAB31 | 52 | 0.039 | 0.016 | 0.015 | 1.040 | 1.008 | 1.074 | 53.964 | 0.362 | -0.001 | 0.004 | 0.814 |
| RAB32 | 7 | -0.143 | 0.059 | 0.015 | 0.867 | 0.772 | 0.973 | 2.298 | 0.890 | 0.013 | 0.012 | 0.320 |
| RAB33B | 17 | -0.081 | 0.036 | 0.024 | 0.922 | 0.859 | 0.989 | 21.585 | 0.157 | -0.003 | 0.009 | 0.725 |
| RAB3D | 8 | 0.096 | 0.046 | 0.037 | 1.101 | 1.006 | 1.205 | 3.345 | 0.851 | -0.002 | 0.011 | 0.856 |
| RAB3IL1 | 20 | -0.058 | 0.025 | 0.019 | 0.944 | 0.899 | 0.991 | 14.405 | 0.760 | -0.001 | 0.006 | 0.879 |
| RAB40B | 16 | 0.106 | 0.042 | 0.012 | 1.112 | 1.024 | 1.207 | 13.827 | 0.539 | 0.005 | 0.010 | 0.665 |
| RAB44 | 18 | 0.051 | 0.016 | 0.001 | 1.053 | 1.021 | 1.086 | 26.300 | 0.069 | -0.002 | 0.013 | 0.855 |
| RAB6B | 18 | 0.055 | 0.026 | 0.036 | 1.057 | 1.004 | 1.112 | 12.282 | 0.783 | 0.006 | 0.008 | 0.443 |
| RABEPK | 40 | 0.062 | 0.018 | 0.001 | 1.063 | 1.026 | 1.102 | 44.667 | 0.246 | 0.002 | 0.006 | 0.784 |
| RABGAP1L | 8 | -0.151 | 0.033 | 0.000 | 0.860 | 0.806 | 0.917 | 3.906 | 0.791 | 0.001 | 0.020 | 0.966 |
| RAD52 | 6 | -0.079 | 0.036 | 0.030 | 0.924 | 0.860 | 0.992 | 4.630 | 0.463 | 0.002 | 0.010 | 0.875 |
| RAD9B | 7 | 0.250 | 0.050 | 0.000 | 1.283 | 1.163 | 1.417 | 1.303 | 0.971 | 0.001 | 0.017 | 0.934 |
| RAI14 | 14 | -0.113 | 0.038 | 0.003 | 0.893 | 0.829 | 0.962 | 8.872 | 0.783 | -0.008 | 0.009 | 0.387 |
| RALB | 48 | 0.044 | 0.017 | 0.010 | 1.045 | 1.010 | 1.080 | 34.933 | 0.903 | 0.003 | 0.005 | 0.526 |
| RANBP3 | 3 | 0.244 | 0.097 | 0.012 | 1.276 | 1.056 | 1.543 | 0.175 | 0.916 | -0.008 | 0.021 | 0.760 |
| RAP1GAP2 | 20 | -0.079 | 0.034 | 0.021 | 0.924 | 0.864 | 0.988 | 20.067 | 0.391 | 0.014 | 0.011 | 0.229 |
| RAP1GDS1 | 20 | 0.059 | 0.026 | 0.021 | 1.061 | 1.009 | 1.116 | 17.132 | 0.581 | -0.004 | 0.006 | 0.508 |
| RAPH1 | 3 | 0.320 | 0.149 | 0.032 | 1.377 | 1.028 | 1.844 | 3.286 | 0.193 | -0.037 | 0.042 | 0.536 |
| RASD1 | 10 | 0.154 | 0.070 | 0.027 | 1.167 | 1.017 | 1.339 | 15.678 | 0.074 | 0.032 | 0.016 | 0.085 |
| RASL11A | 8 | -0.103 | 0.049 | 0.037 | 0.902 | 0.819 | 0.994 | 1.879 | 0.966 | -0.013 | 0.014 | 0.359 |
| RASSF1 | 3 | 0.139 | 0.047 | 0.003 | 1.149 | 1.049 | 1.259 | 2.731 | 0.255 | 0.069 | 0.046 | 0.378 |
| RBBP8 | 26 | 0.053 | 0.019 | 0.007 | 1.054 | 1.015 | 1.095 | 26.513 | 0.381 | 0.000 | 0.006 | 0.997 |
| RBBP9 | 14 | 0.115 | 0.043 | 0.008 | 1.122 | 1.030 | 1.221 | 14.337 | 0.351 | 0.010 | 0.011 | 0.389 |
| RBCK1 | 16 | -0.067 | 0.022 | 0.003 | 0.936 | 0.896 | 0.977 | 12.235 | 0.661 | 0.000 | 0.009 | 0.972 |
| RBFA | 10 | 0.151 | 0.046 | 0.001 | 1.163 | 1.062 | 1.273 | 9.541 | 0.389 | 0.023 | 0.018 | 0.226 |
| RBM11 | 25 | -0.058 | 0.023 | 0.013 | 0.943 | 0.901 | 0.988 | 16.349 | 0.875 | 0.006 | 0.007 | 0.419 |
| RBM26-AS1 | 17 | 0.035 | 0.011 | 0.001 | 1.036 | 1.015 | 1.057 | 14.870 | 0.534 | 0.004 | 0.006 | 0.442 |
| RBM26 | 6 | 0.157 | 0.038 | 0.000 | 1.170 | 1.085 | 1.261 | 2.577 | 0.765 | -0.006 | 0.019 | 0.783 |
| RBM39 | 5 | -0.177 | 0.077 | 0.022 | 0.838 | 0.720 | 0.975 | 3.568 | 0.468 | 0.019 | 0.015 | 0.289 |
| RBM43 | 68 | -0.023 | 0.010 | 0.023 | 0.977 | 0.958 | 0.997 | 72.745 | 0.295 | 0.000 | 0.004 | 0.952 |
| RBMS2 | 60 | -0.038 | 0.012 | 0.002 | 0.963 | 0.940 | 0.986 | 60.430 | 0.424 | -0.004 | 0.005 | 0.443 |
| RCBTB1 | 59 | 0.025 | 0.012 | 0.032 | 1.025 | 1.002 | 1.049 | 60.908 | 0.372 | -0.001 | 0.004 | 0.815 |
| RCC2 | 16 | -0.096 | 0.031 | 0.002 | 0.908 | 0.855 | 0.964 | 11.852 | 0.690 | -0.010 | 0.014 | 0.493 |
| RCHY1 | 34 | -0.051 | 0.019 | 0.007 | 0.950 | 0.916 | 0.986 | 35.708 | 0.342 | -0.009 | 0.006 | 0.133 |
| RCN1 | 3 | -0.170 | 0.081 | 0.036 | 0.844 | 0.720 | 0.989 | 1.802 | 0.406 | -0.007 | 0.028 | 0.847 |
| RDH13 | 39 | -0.028 | 0.010 | 0.004 | 0.972 | 0.954 | 0.991 | 28.091 | 0.880 | -0.004 | 0.006 | 0.550 |
| REEP1 | 35 | -0.055 | 0.016 | 0.000 | 0.946 | 0.918 | 0.975 | 37.057 | 0.330 | -0.008 | 0.005 | 0.098 |
| REEP4 | 21 | -0.092 | 0.021 | 0.000 | 0.912 | 0.874 | 0.951 | 19.688 | 0.478 | -0.001 | 0.007 | 0.827 |
| REEP5 | 35 | 0.043 | 0.021 | 0.041 | 1.044 | 1.002 | 1.087 | 29.875 | 0.670 | 0.009 | 0.007 | 0.225 |
| REL | 5 | -0.191 | 0.089 | 0.032 | 0.827 | 0.694 | 0.984 | 3.168 | 0.530 | 0.004 | 0.018 | 0.842 |
| RFC5 | 14 | 0.136 | 0.038 | 0.000 | 1.146 | 1.063 | 1.235 | 12.611 | 0.478 | -0.002 | 0.010 | 0.850 |
| RFPL3S | 9 | 0.052 | 0.025 | 0.035 | 1.054 | 1.004 | 1.106 | 4.664 | 0.793 | 0.000 | 0.007 | 0.974 |
| RFTN1 | 23 | 0.086 | 0.037 | 0.019 | 1.090 | 1.014 | 1.171 | 28.532 | 0.159 | 0.006 | 0.009 | 0.523 |
| RGMB | 51 | -0.045 | 0.016 | 0.004 | 0.956 | 0.927 | 0.986 | 45.785 | 0.643 | 0.000 | 0.007 | 0.967 |
| RGPD8 | 12 | -0.077 | 0.038 | 0.046 | 0.926 | 0.859 | 0.999 | 13.613 | 0.255 | 0.007 | 0.010 | 0.487 |
| RGS10 | 10 | -0.066 | 0.032 | 0.042 | 0.936 | 0.879 | 0.998 | 3.470 | 0.943 | -0.007 | 0.007 | 0.321 |
| RGS14 | 7 | 0.205 | 0.057 | 0.000 | 1.228 | 1.099 | 1.372 | 3.918 | 0.688 | -0.018 | 0.017 | 0.337 |
| RHBDD3 | 4 | -0.188 | 0.089 | 0.035 | 0.829 | 0.696 | 0.987 | 4.341 | 0.227 | -0.005 | 0.021 | 0.847 |
| RHOT2 | 3 | 0.208 | 0.083 | 0.012 | 1.231 | 1.047 | 1.448 | 1.547 | 0.461 | -0.020 | 0.025 | 0.573 |
| RIMS3 | 24 | -0.071 | 0.026 | 0.006 | 0.932 | 0.886 | 0.980 | 13.413 | 0.942 | 0.004 | 0.008 | 0.619 |
| RIN1 | 20 | 0.104 | 0.022 | 0.000 | 1.110 | 1.062 | 1.160 | 18.639 | 0.480 | 0.001 | 0.006 | 0.929 |
| RIPK2 | 15 | -0.083 | 0.031 | 0.008 | 0.920 | 0.865 | 0.979 | 8.222 | 0.877 | -0.001 | 0.012 | 0.907 |
| RMDN3 | 19 | 0.084 | 0.025 | 0.001 | 1.087 | 1.035 | 1.142 | 12.166 | 0.839 | 0.003 | 0.007 | 0.713 |
| RNF126 | 6 | 0.114 | 0.043 | 0.008 | 1.121 | 1.030 | 1.219 | 3.017 | 0.697 | 0.004 | 0.013 | 0.766 |
| RNF130 | 19 | 0.153 | 0.032 | 0.000 | 1.165 | 1.094 | 1.241 | 17.681 | 0.477 | 0.005 | 0.007 | 0.463 |
| RNF175 | 24 | -0.079 | 0.025 | 0.002 | 0.924 | 0.879 | 0.970 | 19.522 | 0.671 | -0.008 | 0.008 | 0.316 |
| RNF219 | 23 | -0.082 | 0.027 | 0.003 | 0.921 | 0.873 | 0.972 | 26.929 | 0.214 | 0.003 | 0.008 | 0.712 |
| RNF34 | 17 | 0.050 | 0.025 | 0.047 | 1.051 | 1.001 | 1.105 | 13.365 | 0.646 | 0.001 | 0.007 | 0.903 |
| RNFT1 | 17 | -0.031 | 0.015 | 0.041 | 0.969 | 0.941 | 0.999 | 11.256 | 0.793 | 0.006 | 0.010 | 0.568 |
| RNU1-22P | 5 | -0.040 | 0.020 | 0.039 | 0.960 | 0.924 | 0.998 | 1.346 | 0.854 | 0.018 | 0.062 | 0.797 |
| ROR2 | 8 | -0.089 | 0.036 | 0.013 | 0.915 | 0.853 | 0.981 | 7.220 | 0.406 | 0.007 | 0.013 | 0.622 |
| RP1-102H19.6 | 10 | 0.044 | 0.018 | 0.016 | 1.045 | 1.008 | 1.082 | 4.859 | 0.846 | 0.007 | 0.016 | 0.664 |
| RP1-153P14.8 | 45 | 0.019 | 0.008 | 0.013 | 1.020 | 1.004 | 1.035 | 57.013 | 0.090 | 0.004 | 0.007 | 0.545 |
| RP1-167A14.2 | 21 | -0.023 | 0.010 | 0.025 | 0.978 | 0.958 | 0.997 | 13.944 | 0.833 | -0.001 | 0.008 | 0.939 |
| RP1-197B17.3 | 20 | 0.026 | 0.011 | 0.019 | 1.027 | 1.004 | 1.050 | 17.783 | 0.537 | 0.001 | 0.006 | 0.910 |
| RP1-34L19.1 | 16 | 0.044 | 0.017 | 0.008 | 1.045 | 1.012 | 1.080 | 21.293 | 0.128 | -0.011 | 0.009 | 0.258 |
| RP1-56L9.7 | 5 | 0.070 | 0.029 | 0.018 | 1.072 | 1.012 | 1.135 | 1.887 | 0.757 | -0.009 | 0.027 | 0.751 |
| RP1-59D14.3 | 7 | -0.144 | 0.052 | 0.006 | 0.866 | 0.781 | 0.959 | 2.966 | 0.813 | -0.002 | 0.016 | 0.922 |
| RP1-59D14.5 | 3 | -0.086 | 0.039 | 0.026 | 0.917 | 0.850 | 0.990 | 0.853 | 0.653 | -0.028 | 0.031 | 0.529 |
| RP1-59D14.6 | 7 | 0.044 | 0.021 | 0.032 | 1.045 | 1.004 | 1.088 | 5.699 | 0.458 | -0.017 | 0.015 | 0.298 |
| RP1-66C13.3 | 15 | 0.039 | 0.014 | 0.005 | 1.039 | 1.012 | 1.068 | 10.926 | 0.692 | 0.004 | 0.009 | 0.675 |
| RP1-68D18.2 | 3 | 0.106 | 0.035 | 0.003 | 1.112 | 1.038 | 1.192 | 1.814 | 0.404 | 0.010 | 0.018 | 0.692 |
| RP1-68D18.4 | 8 | 0.067 | 0.018 | 0.000 | 1.069 | 1.033 | 1.107 | 4.871 | 0.676 | 0.013 | 0.009 | 0.208 |
| RP1-80B9.2 | 6 | -0.055 | 0.026 | 0.031 | 0.946 | 0.900 | 0.995 | 1.027 | 0.960 | 0.001 | 0.010 | 0.895 |
| RP11-1038A11.3 | 9 | 0.053 | 0.023 | 0.020 | 1.054 | 1.008 | 1.102 | 6.420 | 0.600 | -0.007 | 0.012 | 0.557 |
| RP11-103G8.2 | 10 | 0.037 | 0.017 | 0.031 | 1.038 | 1.003 | 1.074 | 2.093 | 0.990 | 0.005 | 0.014 | 0.734 |
| RP11-1055B8.4 | 23 | 0.024 | 0.010 | 0.021 | 1.024 | 1.004 | 1.046 | 13.224 | 0.927 | 0.007 | 0.007 | 0.326 |
| RP11-1101H11.1 | 9 | -0.038 | 0.016 | 0.020 | 0.962 | 0.932 | 0.994 | 4.484 | 0.811 | -0.010 | 0.014 | 0.521 |
| RP11-110G21.1 | 3 | -0.099 | 0.043 | 0.023 | 0.906 | 0.832 | 0.986 | 1.077 | 0.584 | 0.153 | 0.160 | 0.514 |
| RP11-114H24.6 | 5 | -0.079 | 0.033 | 0.017 | 0.924 | 0.867 | 0.986 | 8.112 | 0.088 | 0.027 | 0.048 | 0.604 |
| RP11-127L20.6 | 21 | -0.061 | 0.015 | 0.000 | 0.941 | 0.913 | 0.969 | 22.072 | 0.337 | -0.015 | 0.009 | 0.109 |
| RP11-1280N14.3 | 3 | 0.081 | 0.033 | 0.014 | 1.085 | 1.017 | 1.157 | 0.051 | 0.975 | -0.013 | 0.056 | 0.860 |
| RP11-1379J22.2 | 3 | 0.103 | 0.051 | 0.042 | 1.108 | 1.004 | 1.224 | 0.556 | 0.757 | -0.030 | 0.044 | 0.615 |
| RP11-1398P2.1 | 41 | 0.041 | 0.014 | 0.003 | 1.042 | 1.014 | 1.071 | 44.260 | 0.297 | 0.002 | 0.006 | 0.761 |
| RP11-159N11.4 | 16 | 0.058 | 0.014 | 0.000 | 1.060 | 1.031 | 1.089 | 16.825 | 0.329 | 0.021 | 0.014 | 0.144 |
| RP11-166B2.1 | 18 | 0.043 | 0.017 | 0.012 | 1.044 | 1.009 | 1.079 | 9.870 | 0.909 | 0.003 | 0.008 | 0.746 |
| RP11-175P19.2 | 17 | 0.026 | 0.013 | 0.041 | 1.026 | 1.001 | 1.051 | 13.117 | 0.664 | -0.006 | 0.011 | 0.619 |
| RP11-176F3.7 | 7 | -0.051 | 0.022 | 0.021 | 0.950 | 0.910 | 0.992 | 4.512 | 0.608 | -0.010 | 0.013 | 0.477 |
| RP11-181G12.2 | 9 | -0.048 | 0.020 | 0.020 | 0.954 | 0.916 | 0.993 | 8.104 | 0.423 | -0.007 | 0.023 | 0.762 |
| RP11-182J23.1 | 13 | 0.049 | 0.018 | 0.007 | 1.051 | 1.013 | 1.089 | 14.671 | 0.260 | -0.003 | 0.011 | 0.816 |
| RP11-186O14.4 | 3 | -0.117 | 0.049 | 0.018 | 0.890 | 0.808 | 0.980 | 0.578 | 0.749 | -0.016 | 0.083 | 0.879 |
| RP11-195E2.1 | 12 | -0.028 | 0.013 | 0.033 | 0.972 | 0.947 | 0.998 | 7.403 | 0.766 | 0.006 | 0.009 | 0.540 |
| RP11-195E2.4 | 11 | -0.027 | 0.011 | 0.013 | 0.973 | 0.952 | 0.994 | 8.498 | 0.580 | -0.007 | 0.010 | 0.503 |
| RP11-195F19.9 | 23 | 0.038 | 0.010 | 0.000 | 1.039 | 1.018 | 1.060 | 11.649 | 0.964 | 0.006 | 0.007 | 0.378 |
| RP11-214O1.2 | 16 | 0.030 | 0.015 | 0.044 | 1.030 | 1.001 | 1.060 | 21.678 | 0.117 | 0.003 | 0.008 | 0.715 |
| RP11-23J18.1 | 18 | 0.027 | 0.013 | 0.039 | 1.028 | 1.001 | 1.054 | 10.022 | 0.903 | -0.003 | 0.007 | 0.700 |
| RP11-247A12.2 | 3 | 0.091 | 0.045 | 0.043 | 1.095 | 1.003 | 1.196 | 2.955 | 0.228 | 0.056 | 0.035 | 0.354 |
| RP11-247A12.7 | 8 | 0.042 | 0.021 | 0.049 | 1.043 | 1.000 | 1.088 | 5.115 | 0.646 | -0.013 | 0.010 | 0.226 |
| RP11-259G18.1 | 19 | 0.030 | 0.010 | 0.004 | 1.030 | 1.009 | 1.051 | 16.195 | 0.579 | -0.010 | 0.006 | 0.142 |
| RP11-259G18.2 | 10 | 0.079 | 0.031 | 0.011 | 1.082 | 1.018 | 1.149 | 13.135 | 0.157 | -0.014 | 0.011 | 0.220 |
| RP11-259G18.3 | 21 | 0.052 | 0.018 | 0.003 | 1.054 | 1.018 | 1.091 | 20.880 | 0.404 | -0.007 | 0.005 | 0.170 |
| RP11-264M12.2 | 9 | 0.060 | 0.013 | 0.000 | 1.062 | 1.035 | 1.090 | 7.039 | 0.532 | 0.004 | 0.012 | 0.743 |
| RP11-274B18.2 | 17 | 0.029 | 0.011 | 0.008 | 1.030 | 1.008 | 1.053 | 14.674 | 0.549 | 0.007 | 0.012 | 0.542 |
| RP11-274B18.4 | 7 | 0.053 | 0.022 | 0.015 | 1.055 | 1.010 | 1.101 | 5.511 | 0.480 | -0.001 | 0.014 | 0.972 |
| RP11-27I1.2 | 86 | -0.017 | 0.006 | 0.005 | 0.983 | 0.972 | 0.995 | 94.868 | 0.218 | 0.003 | 0.004 | 0.524 |
| RP11-283I3.6 | 13 | 0.048 | 0.015 | 0.002 | 1.049 | 1.018 | 1.081 | 8.850 | 0.716 | -0.001 | 0.010 | 0.885 |
| RP11-288H12.3 | 17 | 0.030 | 0.013 | 0.021 | 1.031 | 1.004 | 1.058 | 13.145 | 0.662 | 0.005 | 0.007 | 0.495 |
| RP11-290F20.3 | 24 | -0.021 | 0.010 | 0.041 | 0.979 | 0.959 | 0.999 | 18.047 | 0.755 | -0.010 | 0.007 | 0.154 |
| RP11-293A21.1 | 16 | 0.051 | 0.020 | 0.012 | 1.052 | 1.011 | 1.095 | 15.914 | 0.388 | 0.000 | 0.010 | 0.997 |
| RP11-298I3.1 | 10 | -0.044 | 0.014 | 0.002 | 0.957 | 0.931 | 0.984 | 7.995 | 0.535 | -0.011 | 0.013 | 0.438 |
| RP11-333A23.4 | 7 | -0.107 | 0.027 | 0.000 | 0.899 | 0.853 | 0.947 | 2.868 | 0.825 | -0.005 | 0.033 | 0.896 |
| RP11-33B1.1 | 21 | -0.040 | 0.017 | 0.021 | 0.961 | 0.929 | 0.994 | 9.859 | 0.971 | 0.002 | 0.008 | 0.785 |
| RP11-33B1.2 | 28 | 0.028 | 0.009 | 0.003 | 1.028 | 1.009 | 1.047 | 19.733 | 0.842 | 0.005 | 0.006 | 0.430 |
| RP11-33B1.4 | 33 | 0.025 | 0.009 | 0.004 | 1.026 | 1.008 | 1.043 | 21.477 | 0.921 | -0.002 | 0.006 | 0.708 |
| RP11-347C12.2 | 36 | -0.080 | 0.014 | 0.000 | 0.923 | 0.898 | 0.949 | 45.973 | 0.102 | -0.015 | 0.010 | 0.156 |
| RP11-347I19.3 | 3 | -0.212 | 0.073 | 0.004 | 0.809 | 0.702 | 0.933 | 0.231 | 0.891 | 0.002 | 0.021 | 0.924 |
| RP11-351I24.1 | 5 | -0.213 | 0.051 | 0.000 | 0.808 | 0.730 | 0.894 | 2.203 | 0.698 | -0.001 | 0.014 | 0.947 |
| RP11-356N1.2 | 17 | -0.038 | 0.013 | 0.002 | 0.963 | 0.939 | 0.987 | 24.276 | 0.084 | -0.002 | 0.009 | 0.840 |
| RP11-357H14.19 | 4 | -0.155 | 0.076 | 0.041 | 0.857 | 0.739 | 0.994 | 2.729 | 0.435 | -0.010 | 0.027 | 0.748 |
| RP11-362F19.1 | 38 | 0.016 | 0.007 | 0.025 | 1.016 | 1.002 | 1.031 | 21.638 | 0.979 | 0.005 | 0.006 | 0.370 |
| RP11-380L11.4 | 3 | -0.104 | 0.043 | 0.015 | 0.901 | 0.828 | 0.980 | 2.240 | 0.326 | -0.037 | 0.025 | 0.377 |
| RP11-38G5.2 | 11 | 0.032 | 0.013 | 0.014 | 1.032 | 1.006 | 1.059 | 8.360 | 0.594 | 0.008 | 0.008 | 0.311 |
| RP11-392A22.2 | 39 | -0.037 | 0.008 | 0.000 | 0.964 | 0.949 | 0.979 | 48.467 | 0.119 | -0.004 | 0.006 | 0.531 |
| RP11-399O19.8 | 5 | 0.059 | 0.022 | 0.008 | 1.061 | 1.015 | 1.108 | 2.632 | 0.621 | 0.017 | 0.027 | 0.561 |
| RP11-420G6.4 | 36 | 0.051 | 0.014 | 0.000 | 1.052 | 1.023 | 1.082 | 29.588 | 0.727 | -0.003 | 0.005 | 0.556 |
| RP11-430C7.4 | 4 | -0.129 | 0.059 | 0.030 | 0.879 | 0.782 | 0.988 | 6.332 | 0.097 | -0.039 | 0.021 | 0.208 |
| RP11-430H10.1 | 7 | -0.056 | 0.023 | 0.015 | 0.946 | 0.904 | 0.989 | 1.643 | 0.949 | -0.002 | 0.014 | 0.913 |
| RP11-439C15.4 | 9 | -0.052 | 0.021 | 0.013 | 0.949 | 0.911 | 0.989 | 2.745 | 0.949 | -0.001 | 0.011 | 0.896 |
| RP11-439E19.3 | 8 | -0.097 | 0.048 | 0.046 | 0.908 | 0.826 | 0.998 | 8.481 | 0.292 | 0.001 | 0.014 | 0.918 |
| RP11-445H22.3 | 17 | 0.037 | 0.010 | 0.000 | 1.038 | 1.017 | 1.059 | 12.520 | 0.707 | -0.005 | 0.008 | 0.538 |
| RP11-448G15.3 | 19 | 0.034 | 0.012 | 0.005 | 1.035 | 1.010 | 1.060 | 18.673 | 0.412 | -0.002 | 0.012 | 0.888 |
| RP11-44F14.1 | 8 | 0.089 | 0.040 | 0.025 | 1.093 | 1.011 | 1.182 | 2.110 | 0.954 | 0.006 | 0.010 | 0.602 |
| RP11-457M11.5 | 38 | 0.018 | 0.009 | 0.050 | 1.018 | 1.000 | 1.037 | 44.836 | 0.176 | 0.011 | 0.007 | 0.099 |
| RP11-45M22.1 | 13 | 0.085 | 0.024 | 0.000 | 1.089 | 1.039 | 1.141 | 5.494 | 0.939 | -0.013 | 0.011 | 0.265 |
| RP11-45P15.4 | 3 | -0.086 | 0.031 | 0.006 | 0.917 | 0.863 | 0.975 | 2.288 | 0.319 | 0.007 | 0.029 | 0.852 |
| RP11-463O9.9 | 11 | 0.051 | 0.023 | 0.027 | 1.052 | 1.006 | 1.100 | 4.598 | 0.916 | 0.013 | 0.011 | 0.259 |
| RP11-465B22.3 | 16 | 0.042 | 0.009 | 0.000 | 1.043 | 1.025 | 1.061 | 9.792 | 0.833 | -0.005 | 0.008 | 0.552 |
| RP11-467H10.1 | 8 | 0.045 | 0.023 | 0.049 | 1.047 | 1.000 | 1.095 | 4.881 | 0.674 | -0.004 | 0.017 | 0.831 |
| RP11-473M20.9 | 20 | -0.025 | 0.010 | 0.017 | 0.975 | 0.956 | 0.995 | 10.084 | 0.951 | -0.001 | 0.007 | 0.861 |
| RP11-488C13.6 | 11 | -0.046 | 0.018 | 0.012 | 0.955 | 0.921 | 0.990 | 7.245 | 0.702 | 0.005 | 0.012 | 0.698 |
| RP11-492E3.1 | 14 | -0.061 | 0.021 | 0.004 | 0.941 | 0.903 | 0.981 | 16.944 | 0.202 | 0.005 | 0.010 | 0.627 |
| RP11-497H16.2 | 4 | -0.080 | 0.037 | 0.031 | 0.923 | 0.858 | 0.993 | 2.210 | 0.530 | 0.016 | 0.037 | 0.709 |
| RP11-497H16.4 | 6 | -0.038 | 0.016 | 0.022 | 0.963 | 0.933 | 0.995 | 3.551 | 0.616 | -0.009 | 0.020 | 0.678 |
| RP11-497H16.7 | 6 | -0.038 | 0.016 | 0.016 | 0.963 | 0.934 | 0.993 | 3.573 | 0.612 | 0.031 | 0.050 | 0.569 |
| RP11-505K9.1 | 12 | 0.103 | 0.031 | 0.001 | 1.109 | 1.042 | 1.179 | 5.313 | 0.915 | -0.004 | 0.014 | 0.782 |
| RP11-50C13.1 | 3 | -0.091 | 0.028 | 0.001 | 0.913 | 0.864 | 0.964 | 0.361 | 0.835 | 0.001 | 0.021 | 0.977 |
| RP11-517B11.7 | 4 | -0.077 | 0.027 | 0.004 | 0.926 | 0.879 | 0.976 | 2.278 | 0.517 | -0.006 | 0.014 | 0.735 |
| RP11-517P14.2 | 7 | -0.045 | 0.021 | 0.030 | 0.956 | 0.917 | 0.996 | 3.001 | 0.809 | -0.011 | 0.013 | 0.436 |
| RP11-526I2.5 | 41 | 0.012 | 0.006 | 0.046 | 1.012 | 1.000 | 1.024 | 30.741 | 0.854 | 0.000 | 0.006 | 0.960 |
| RP11-54C4.1 | 20 | 0.030 | 0.011 | 0.006 | 1.030 | 1.009 | 1.052 | 19.115 | 0.449 | 0.014 | 0.007 | 0.075 |
| RP11-551L14.1 | 13 | -0.085 | 0.038 | 0.023 | 0.918 | 0.853 | 0.988 | 12.805 | 0.383 | -0.013 | 0.014 | 0.354 |
| RP11-553L6.2 | 4 | -0.074 | 0.037 | 0.046 | 0.928 | 0.863 | 0.999 | 1.404 | 0.705 | -0.020 | 0.024 | 0.486 |
| RP11-564C4.6 | 43 | -0.040 | 0.007 | 0.000 | 0.960 | 0.948 | 0.973 | 44.873 | 0.352 | -0.003 | 0.005 | 0.529 |
| RP11-589P10.5 | 7 | -0.050 | 0.019 | 0.010 | 0.952 | 0.916 | 0.988 | 6.351 | 0.385 | 0.019 | 0.014 | 0.228 |
| RP11-598F7.4 | 12 | 0.055 | 0.026 | 0.035 | 1.056 | 1.004 | 1.111 | 14.301 | 0.217 | 0.024 | 0.013 | 0.098 |
| RP11-5K23.3 | 29 | 0.034 | 0.010 | 0.000 | 1.035 | 1.015 | 1.054 | 36.970 | 0.120 | -0.006 | 0.008 | 0.444 |
| RP11-600F24.7 | 6 | 0.075 | 0.033 | 0.021 | 1.078 | 1.011 | 1.149 | 6.780 | 0.237 | 0.034 | 0.018 | 0.137 |
| RP11-618I10.1 | 8 | -0.064 | 0.027 | 0.017 | 0.938 | 0.890 | 0.988 | 5.587 | 0.589 | 0.012 | 0.011 | 0.317 |
| RP11-61O1.1 | 5 | -0.093 | 0.025 | 0.000 | 0.911 | 0.868 | 0.956 | 3.642 | 0.457 | 0.050 | 0.028 | 0.174 |
| RP11-641A6.2 | 22 | 0.032 | 0.010 | 0.001 | 1.032 | 1.013 | 1.052 | 14.852 | 0.830 | -0.001 | 0.007 | 0.880 |
| RP11-645N11.2 | 8 | 0.040 | 0.020 | 0.047 | 1.041 | 1.001 | 1.083 | 7.931 | 0.339 | 0.003 | 0.011 | 0.807 |
| RP11-64K12.2 | 12 | 0.053 | 0.016 | 0.001 | 1.055 | 1.021 | 1.089 | 5.733 | 0.891 | 0.007 | 0.012 | 0.584 |
| RP11-660L16.2 | 33 | 0.025 | 0.008 | 0.001 | 1.025 | 1.010 | 1.041 | 29.235 | 0.607 | 0.000 | 0.007 | 0.987 |
| RP11-661A12.5 | 49 | 0.017 | 0.006 | 0.005 | 1.017 | 1.005 | 1.029 | 37.491 | 0.863 | 0.005 | 0.005 | 0.338 |
| RP11-664D1.1 | 36 | 0.051 | 0.015 | 0.001 | 1.052 | 1.022 | 1.084 | 46.391 | 0.094 | -0.002 | 0.006 | 0.730 |
| RP11-677C1.2 | 8 | -0.102 | 0.032 | 0.002 | 0.903 | 0.848 | 0.962 | 7.484 | 0.380 | -0.014 | 0.010 | 0.241 |
| RP11-685G9.2 | 12 | -0.037 | 0.018 | 0.035 | 0.964 | 0.931 | 0.997 | 14.328 | 0.215 | 0.004 | 0.009 | 0.705 |
| RP11-685M7.3 | 4 | 0.103 | 0.034 | 0.002 | 1.109 | 1.037 | 1.185 | 3.693 | 0.297 | 0.008 | 0.054 | 0.900 |
| RP11-696N14.1 | 16 | -0.057 | 0.017 | 0.001 | 0.944 | 0.914 | 0.976 | 10.333 | 0.798 | 0.000 | 0.008 | 0.975 |
| RP11-697E2.7 | 18 | 0.065 | 0.022 | 0.003 | 1.067 | 1.022 | 1.114 | 19.773 | 0.286 | 0.006 | 0.008 | 0.447 |
| RP11-697N18.3 | 3 | -0.072 | 0.034 | 0.036 | 0.931 | 0.870 | 0.995 | 0.101 | 0.951 | 0.007 | 0.023 | 0.804 |
| RP11-698N11.4 | 10 | 0.050 | 0.022 | 0.023 | 1.051 | 1.007 | 1.097 | 11.806 | 0.224 | -0.008 | 0.011 | 0.515 |
| RP11-701P16.4 | 4 | -0.071 | 0.031 | 0.021 | 0.931 | 0.877 | 0.989 | 0.754 | 0.860 | -0.002 | 0.012 | 0.855 |
| RP11-701P16.5 | 14 | -0.033 | 0.016 | 0.039 | 0.968 | 0.938 | 0.998 | 10.912 | 0.618 | 0.006 | 0.011 | 0.598 |
| RP11-703I16.1 | 15 | -0.044 | 0.017 | 0.010 | 0.957 | 0.925 | 0.989 | 19.215 | 0.157 | 0.005 | 0.012 | 0.692 |
| RP11-704M14.1 | 13 | -0.033 | 0.013 | 0.013 | 0.967 | 0.942 | 0.993 | 16.457 | 0.171 | -0.004 | 0.011 | 0.701 |
| RP11-705C15.3 | 26 | 0.024 | 0.011 | 0.031 | 1.025 | 1.002 | 1.047 | 25.134 | 0.455 | 0.007 | 0.007 | 0.295 |
| RP11-71H17.7 | 10 | -0.044 | 0.021 | 0.042 | 0.957 | 0.918 | 0.998 | 6.686 | 0.670 | 0.001 | 0.012 | 0.920 |
| RP11-73M18.9 | 27 | -0.027 | 0.010 | 0.005 | 0.974 | 0.955 | 0.992 | 21.192 | 0.732 | -0.002 | 0.008 | 0.802 |
| RP11-770G2.2 | 13 | 0.045 | 0.019 | 0.016 | 1.046 | 1.008 | 1.086 | 17.236 | 0.141 | 0.010 | 0.010 | 0.368 |
| RP11-78O7.2 | 6 | -0.061 | 0.024 | 0.012 | 0.941 | 0.898 | 0.987 | 1.984 | 0.851 | 0.000 | 0.020 | 0.988 |
| RP11-795F19.1 | 18 | -0.020 | 0.010 | 0.041 | 0.980 | 0.962 | 0.999 | 19.469 | 0.302 | 0.005 | 0.008 | 0.537 |
| RP11-795F19.5 | 8 | 0.079 | 0.023 | 0.001 | 1.082 | 1.034 | 1.132 | 5.827 | 0.560 | 0.011 | 0.019 | 0.589 |
| RP11-797A18.3 | 42 | -0.021 | 0.009 | 0.017 | 0.979 | 0.962 | 0.996 | 47.598 | 0.222 | -0.007 | 0.007 | 0.328 |
| RP11-798G7.6 | 9 | -0.051 | 0.017 | 0.003 | 0.950 | 0.918 | 0.983 | 9.210 | 0.325 | -0.002 | 0.014 | 0.897 |
| RP11-807H22.5 | 9 | -0.056 | 0.019 | 0.003 | 0.946 | 0.911 | 0.982 | 3.110 | 0.927 | 0.014 | 0.018 | 0.469 |
| RP11-809N8.4 | 6 | -0.066 | 0.027 | 0.013 | 0.936 | 0.888 | 0.986 | 5.226 | 0.389 | -0.023 | 0.014 | 0.192 |
| RP11-809O17.1 | 28 | 0.039 | 0.011 | 0.000 | 1.040 | 1.018 | 1.062 | 37.578 | 0.085 | 0.010 | 0.008 | 0.198 |
| RP11-80H8.4 | 4 | -0.082 | 0.035 | 0.018 | 0.921 | 0.861 | 0.986 | 2.764 | 0.429 | -0.035 | 0.027 | 0.325 |
| RP11-856M7.6 | 5 | -0.077 | 0.029 | 0.007 | 0.925 | 0.875 | 0.979 | 0.595 | 0.964 | -0.011 | 0.019 | 0.584 |
| RP11-862G15.2 | 5 | -0.094 | 0.033 | 0.005 | 0.910 | 0.853 | 0.972 | 2.800 | 0.592 | 0.060 | 0.096 | 0.576 |
| RP11-875O11.3 | 19 | -0.037 | 0.010 | 0.000 | 0.963 | 0.945 | 0.982 | 13.749 | 0.745 | 0.000 | 0.006 | 0.998 |
| RP11-876N24.5 | 4 | -0.100 | 0.043 | 0.019 | 0.905 | 0.832 | 0.984 | 2.575 | 0.462 | -0.024 | 0.052 | 0.689 |
| RP11-87G24.3 | 9 | 0.055 | 0.018 | 0.003 | 1.056 | 1.019 | 1.095 | 2.621 | 0.956 | -0.001 | 0.010 | 0.947 |
| RP11-8L8.2 | 6 | -0.077 | 0.038 | 0.046 | 0.926 | 0.859 | 0.999 | 3.105 | 0.684 | 0.006 | 0.015 | 0.698 |
| RP11-90P13.1 | 5 | 0.061 | 0.030 | 0.043 | 1.063 | 1.002 | 1.128 | 5.350 | 0.253 | 0.000 | 0.019 | 0.996 |
| RP11-91P24.1 | 3 | -0.121 | 0.035 | 0.001 | 0.886 | 0.827 | 0.949 | 2.576 | 0.276 | 0.015 | 0.042 | 0.780 |
| RP11-94L15.2 | 6 | -0.080 | 0.027 | 0.004 | 0.924 | 0.876 | 0.974 | 0.432 | 0.994 | 0.008 | 0.023 | 0.754 |
| RP11-981P6.1 | 17 | 0.038 | 0.018 | 0.040 | 1.038 | 1.002 | 1.076 | 23.455 | 0.102 | 0.001 | 0.010 | 0.906 |
| RP11-98I9.4 | 41 | 0.017 | 0.007 | 0.019 | 1.017 | 1.003 | 1.031 | 46.708 | 0.216 | 0.010 | 0.007 | 0.133 |
| RP11-996F15.2 | 28 | -0.041 | 0.012 | 0.000 | 0.960 | 0.938 | 0.982 | 18.685 | 0.881 | 0.000 | 0.005 | 0.974 |
| RP13-942N8.1 | 24 | 0.042 | 0.014 | 0.003 | 1.043 | 1.014 | 1.073 | 23.819 | 0.414 | 0.006 | 0.005 | 0.250 |
| RP13-98N21.3 | 37 | -0.019 | 0.008 | 0.016 | 0.981 | 0.966 | 0.996 | 27.804 | 0.834 | -0.004 | 0.006 | 0.458 |
| RP3-370M22.8 | 11 | 0.043 | 0.016 | 0.007 | 1.044 | 1.012 | 1.078 | 5.213 | 0.877 | -0.002 | 0.009 | 0.852 |
| RP3-393E18.2 | 16 | 0.078 | 0.028 | 0.006 | 1.081 | 1.023 | 1.142 | 6.008 | 0.980 | -0.001 | 0.009 | 0.946 |
| RP3-395C13.1 | 5 | -0.078 | 0.031 | 0.012 | 0.925 | 0.871 | 0.983 | 1.254 | 0.869 | -0.013 | 0.050 | 0.805 |
| RP3-407E4.4 | 20 | 0.040 | 0.015 | 0.007 | 1.041 | 1.011 | 1.072 | 18.464 | 0.492 | 0.010 | 0.011 | 0.392 |
| RP3-455J7.4 | 14 | 0.053 | 0.018 | 0.004 | 1.054 | 1.017 | 1.093 | 8.012 | 0.843 | -0.008 | 0.008 | 0.373 |
| RP3-525N10.2 | 36 | 0.034 | 0.012 | 0.004 | 1.035 | 1.011 | 1.059 | 21.735 | 0.961 | 0.003 | 0.006 | 0.603 |
| RP4-647C14.3 | 8 | -0.089 | 0.031 | 0.004 | 0.915 | 0.861 | 0.971 | 4.997 | 0.660 | 0.002 | 0.016 | 0.903 |
| RP4-669P10.18 | 3 | -0.088 | 0.042 | 0.037 | 0.916 | 0.844 | 0.995 | 0.694 | 0.707 | -0.015 | 0.026 | 0.660 |
| RP4-742C19.12 | 7 | 0.049 | 0.019 | 0.009 | 1.051 | 1.012 | 1.090 | 3.657 | 0.723 | 0.009 | 0.018 | 0.621 |
| RP4-798C17.5 | 16 | 0.038 | 0.016 | 0.016 | 1.038 | 1.007 | 1.071 | 6.093 | 0.978 | 0.000 | 0.009 | 0.994 |
| RP5-1096D14.3 | 3 | -0.105 | 0.049 | 0.033 | 0.900 | 0.817 | 0.991 | 1.114 | 0.573 | 0.001 | 0.018 | 0.949 |
| RP5-1112D6.4 | 19 | 0.038 | 0.015 | 0.010 | 1.039 | 1.009 | 1.069 | 10.299 | 0.922 | 0.015 | 0.008 | 0.094 |
| RP5-943J3.1 | 33 | -0.017 | 0.008 | 0.042 | 0.983 | 0.967 | 0.999 | 33.682 | 0.386 | 0.008 | 0.006 | 0.195 |
| RP5-968J1.1 | 5 | 0.068 | 0.032 | 0.035 | 1.070 | 1.005 | 1.140 | 1.919 | 0.751 | -0.012 | 0.048 | 0.818 |
| RPA3 | 4 | 0.110 | 0.051 | 0.031 | 1.116 | 1.010 | 1.234 | 3.038 | 0.386 | 0.001 | 0.022 | 0.981 |
| RPAP1 | 39 | -0.038 | 0.019 | 0.047 | 0.963 | 0.927 | 0.999 | 20.145 | 0.992 | -0.001 | 0.006 | 0.865 |
| RPF2 | 29 | -0.047 | 0.022 | 0.034 | 0.954 | 0.913 | 0.997 | 29.416 | 0.392 | 0.009 | 0.006 | 0.126 |
| RPL13 | 30 | 0.039 | 0.019 | 0.036 | 1.040 | 1.002 | 1.078 | 34.621 | 0.217 | 0.009 | 0.006 | 0.176 |
| RPL36 | 3 | 0.196 | 0.092 | 0.034 | 1.216 | 1.015 | 1.458 | 1.363 | 0.506 | 0.010 | 0.016 | 0.648 |
| RPL8 | 46 | 0.032 | 0.012 | 0.008 | 1.032 | 1.008 | 1.057 | 41.784 | 0.609 | 0.006 | 0.007 | 0.357 |
| RPN1 | 21 | -0.088 | 0.023 | 0.000 | 0.916 | 0.875 | 0.959 | 20.315 | 0.438 | -0.014 | 0.007 | 0.052 |
| RPP21 | 5 | -0.087 | 0.044 | 0.049 | 0.917 | 0.841 | 0.999 | 1.945 | 0.746 | -0.012 | 0.024 | 0.667 |
| RPP25L | 22 | -0.061 | 0.025 | 0.017 | 0.941 | 0.895 | 0.989 | 23.294 | 0.328 | 0.002 | 0.010 | 0.827 |
| RPP38 | 10 | -0.145 | 0.049 | 0.003 | 0.865 | 0.786 | 0.951 | 1.162 | 0.999 | 0.003 | 0.010 | 0.744 |
| RPS6KB1 | 3 | 0.176 | 0.082 | 0.032 | 1.193 | 1.015 | 1.402 | 1.709 | 0.426 | 0.052 | 0.043 | 0.446 |
| RPS6KC1 | 3 | 0.357 | 0.096 | 0.000 | 1.429 | 1.183 | 1.726 | 0.981 | 0.612 | 0.021 | 0.023 | 0.537 |
| RPS9 | 26 | -0.035 | 0.010 | 0.001 | 0.966 | 0.947 | 0.985 | 26.910 | 0.360 | -0.008 | 0.007 | 0.297 |
| RRM1 | 34 | -0.040 | 0.020 | 0.045 | 0.960 | 0.923 | 0.999 | 39.076 | 0.216 | -0.004 | 0.006 | 0.546 |
| RRP36 | 7 | -0.154 | 0.054 | 0.005 | 0.858 | 0.771 | 0.954 | 1.948 | 0.924 | 0.011 | 0.012 | 0.381 |
| RRP7A | 60 | -0.037 | 0.012 | 0.002 | 0.964 | 0.942 | 0.987 | 54.111 | 0.656 | -0.003 | 0.004 | 0.406 |
| RRP8 | 15 | 0.102 | 0.029 | 0.000 | 1.107 | 1.047 | 1.171 | 10.304 | 0.740 | 0.006 | 0.008 | 0.488 |
| RSAD1 | 16 | -0.082 | 0.034 | 0.016 | 0.921 | 0.862 | 0.985 | 8.647 | 0.895 | 0.000 | 0.011 | 0.976 |
| RSU1 | 58 | 0.031 | 0.013 | 0.020 | 1.032 | 1.005 | 1.059 | 63.921 | 0.246 | -0.006 | 0.004 | 0.192 |
| RTCA | 10 | -0.078 | 0.039 | 0.044 | 0.925 | 0.857 | 0.998 | 9.639 | 0.380 | -0.001 | 0.012 | 0.929 |
| RUVBL2 | 6 | -0.114 | 0.041 | 0.005 | 0.892 | 0.824 | 0.966 | 1.737 | 0.884 | 0.007 | 0.012 | 0.609 |
| RWDD3 | 38 | -0.043 | 0.018 | 0.015 | 0.958 | 0.925 | 0.992 | 35.189 | 0.554 | -0.004 | 0.005 | 0.416 |
| S100A13 | 26 | 0.047 | 0.020 | 0.019 | 1.049 | 1.008 | 1.091 | 21.394 | 0.670 | 0.008 | 0.008 | 0.330 |
| SALL4 | 11 | -0.101 | 0.048 | 0.034 | 0.904 | 0.823 | 0.993 | 4.891 | 0.898 | -0.006 | 0.010 | 0.571 |
| SAMD12 | 29 | 0.042 | 0.019 | 0.029 | 1.043 | 1.004 | 1.082 | 24.602 | 0.649 | 0.000 | 0.005 | 0.943 |
| SAMD14 | 3 | 0.202 | 0.080 | 0.012 | 1.223 | 1.046 | 1.431 | 1.562 | 0.458 | -0.079 | 0.067 | 0.449 |
| SAMD3 | 45 | -0.029 | 0.015 | 0.050 | 0.972 | 0.945 | 1.000 | 44.459 | 0.452 | -0.006 | 0.006 | 0.296 |
| SAMD4A | 3 | 0.137 | 0.056 | 0.015 | 1.147 | 1.027 | 1.281 | 0.226 | 0.893 | -0.002 | 0.040 | 0.961 |
| SAMD4B | 5 | -0.154 | 0.060 | 0.011 | 0.858 | 0.762 | 0.966 | 2.375 | 0.667 | 0.000 | 0.015 | 0.991 |
| SAMD9L | 15 | -0.038 | 0.015 | 0.011 | 0.962 | 0.934 | 0.991 | 12.531 | 0.564 | -0.008 | 0.006 | 0.239 |
| SAMHD1 | 9 | -0.121 | 0.047 | 0.011 | 0.886 | 0.807 | 0.973 | 4.769 | 0.782 | -0.003 | 0.018 | 0.864 |
| SAP18 | 4 | 0.167 | 0.083 | 0.043 | 1.182 | 1.005 | 1.390 | 1.360 | 0.715 | 0.026 | 0.025 | 0.412 |
| SART3 | 3 | 0.293 | 0.132 | 0.026 | 1.340 | 1.035 | 1.734 | 1.499 | 0.473 | 0.003 | 0.042 | 0.947 |
| SBF1 | 14 | -0.071 | 0.021 | 0.001 | 0.931 | 0.893 | 0.971 | 8.828 | 0.786 | -0.002 | 0.009 | 0.800 |
| SCAPER | 62 | 0.043 | 0.011 | 0.000 | 1.044 | 1.022 | 1.067 | 55.442 | 0.677 | 0.007 | 0.006 | 0.218 |
| SCMH1 | 7 | 0.120 | 0.050 | 0.016 | 1.128 | 1.023 | 1.244 | 7.422 | 0.284 | -0.009 | 0.021 | 0.674 |
| SCNN1A | 6 | 0.277 | 0.109 | 0.011 | 1.319 | 1.064 | 1.635 | 8.991 | 0.109 | -0.027 | 0.024 | 0.329 |
| SCRN3 | 6 | -0.203 | 0.074 | 0.006 | 0.816 | 0.706 | 0.943 | 5.243 | 0.387 | -0.041 | 0.029 | 0.230 |
| SCYL3 | 15 | -0.095 | 0.037 | 0.010 | 0.909 | 0.846 | 0.978 | 9.822 | 0.775 | 0.002 | 0.010 | 0.872 |
| SDAD1P1 | 15 | 0.029 | 0.014 | 0.036 | 1.030 | 1.002 | 1.059 | 5.345 | 0.980 | 0.004 | 0.008 | 0.647 |
| SDK1 | 15 | -0.124 | 0.041 | 0.003 | 0.883 | 0.814 | 0.958 | 12.831 | 0.540 | 0.000 | 0.013 | 0.994 |
| SEC13 | 38 | -0.055 | 0.019 | 0.005 | 0.947 | 0.912 | 0.984 | 29.719 | 0.797 | -0.002 | 0.006 | 0.701 |
| SEC23IP | 3 | 0.269 | 0.104 | 0.010 | 1.309 | 1.068 | 1.606 | 1.519 | 0.468 | 0.027 | 0.035 | 0.586 |
| SECTM1 | 8 | -0.136 | 0.048 | 0.004 | 0.873 | 0.795 | 0.958 | 5.208 | 0.635 | 0.006 | 0.015 | 0.703 |
| SELRC1 | 10 | 0.093 | 0.047 | 0.046 | 1.098 | 1.002 | 1.203 | 8.805 | 0.455 | -0.015 | 0.018 | 0.425 |
| SENP1 | 3 | -0.342 | 0.078 | 0.000 | 0.710 | 0.609 | 0.828 | 1.647 | 0.439 | -0.006 | 0.022 | 0.839 |
| SENP7 | 55 | -0.032 | 0.012 | 0.008 | 0.969 | 0.947 | 0.992 | 50.317 | 0.617 | 0.000 | 0.004 | 0.919 |
| SERBP1P3 | 24 | 0.021 | 0.009 | 0.023 | 1.021 | 1.003 | 1.039 | 22.032 | 0.518 | 0.004 | 0.009 | 0.630 |
| SERF1A | 3 | -0.102 | 0.040 | 0.010 | 0.903 | 0.835 | 0.976 | 0.513 | 0.774 | -0.013 | 0.045 | 0.816 |
| SERF1B | 3 | 0.091 | 0.031 | 0.003 | 1.095 | 1.031 | 1.163 | 0.620 | 0.734 | -0.002 | 0.076 | 0.981 |
| SERINC1 | 27 | 0.062 | 0.030 | 0.040 | 1.064 | 1.003 | 1.128 | 36.764 | 0.078 | -0.005 | 0.007 | 0.463 |
| SERINC3 | 12 | -0.145 | 0.035 | 0.000 | 0.865 | 0.808 | 0.926 | 9.816 | 0.547 | -0.012 | 0.006 | 0.089 |
| SERPINB2 | 13 | -0.079 | 0.040 | 0.046 | 0.924 | 0.855 | 0.999 | 13.699 | 0.320 | -0.007 | 0.013 | 0.586 |
| SERPINB9 | 33 | 0.039 | 0.016 | 0.016 | 1.040 | 1.007 | 1.073 | 29.719 | 0.582 | -0.003 | 0.006 | 0.580 |
| SETD1A | 3 | 0.305 | 0.084 | 0.000 | 1.356 | 1.150 | 1.600 | 1.085 | 0.581 | 0.029 | 0.028 | 0.494 |
| SETD6 | 15 | -0.102 | 0.037 | 0.006 | 0.903 | 0.840 | 0.971 | 12.222 | 0.588 | 0.010 | 0.009 | 0.299 |
| SETD9 | 19 | 0.043 | 0.012 | 0.000 | 1.044 | 1.020 | 1.068 | 14.857 | 0.672 | -0.002 | 0.007 | 0.714 |
| SFMBT1 | 6 | 0.189 | 0.068 | 0.005 | 1.208 | 1.058 | 1.380 | 3.413 | 0.637 | 0.022 | 0.017 | 0.250 |
| SFRP2 | 10 | -0.152 | 0.061 | 0.012 | 0.859 | 0.763 | 0.967 | 13.417 | 0.145 | 0.016 | 0.014 | 0.276 |
| SFT2D1 | 31 | 0.044 | 0.018 | 0.012 | 1.045 | 1.010 | 1.082 | 42.702 | 0.062 | 0.012 | 0.008 | 0.144 |
| SFXN4 | 66 | 0.026 | 0.011 | 0.013 | 1.027 | 1.005 | 1.048 | 66.242 | 0.434 | -0.003 | 0.004 | 0.517 |
| SGSM2 | 14 | -0.076 | 0.036 | 0.033 | 0.927 | 0.864 | 0.994 | 9.055 | 0.769 | -0.001 | 0.008 | 0.898 |
| SH3BGRL2 | 15 | -0.081 | 0.036 | 0.025 | 0.922 | 0.860 | 0.990 | 15.231 | 0.363 | -0.020 | 0.013 | 0.144 |
| SH3GL1P3 | 12 | -0.058 | 0.018 | 0.001 | 0.944 | 0.911 | 0.978 | 7.377 | 0.768 | 0.008 | 0.012 | 0.505 |
| SH3PXD2B | 19 | -0.088 | 0.031 | 0.005 | 0.916 | 0.862 | 0.973 | 15.434 | 0.632 | -0.004 | 0.008 | 0.580 |
| SHMT1 | 35 | 0.037 | 0.017 | 0.025 | 1.038 | 1.005 | 1.072 | 34.660 | 0.436 | 0.012 | 0.006 | 0.080 |
| SIGLEC18P | 6 | 0.066 | 0.024 | 0.007 | 1.068 | 1.018 | 1.121 | 4.173 | 0.525 | -0.009 | 0.013 | 0.530 |
| SIK3 | 3 | -0.172 | 0.079 | 0.029 | 0.842 | 0.721 | 0.982 | 1.053 | 0.591 | -0.020 | 0.020 | 0.496 |
| SIMC1 | 10 | -0.099 | 0.040 | 0.012 | 0.906 | 0.838 | 0.979 | 5.574 | 0.782 | 0.012 | 0.016 | 0.492 |
| SIN3B | 22 | -0.067 | 0.028 | 0.017 | 0.935 | 0.885 | 0.988 | 23.001 | 0.344 | 0.005 | 0.007 | 0.506 |
| SIX5 | 5 | 0.219 | 0.080 | 0.006 | 1.244 | 1.064 | 1.455 | 6.202 | 0.185 | 0.026 | 0.015 | 0.188 |
| SKAP1 | 36 | -0.048 | 0.021 | 0.025 | 0.954 | 0.915 | 0.994 | 44.591 | 0.128 | 0.009 | 0.007 | 0.206 |
| SKAP2 | 77 | -0.022 | 0.010 | 0.031 | 0.978 | 0.959 | 0.998 | 89.902 | 0.132 | -0.004 | 0.004 | 0.290 |
| SLAMF1 | 8 | 0.109 | 0.053 | 0.040 | 1.116 | 1.005 | 1.238 | 10.874 | 0.144 | -0.011 | 0.024 | 0.654 |
| SLC12A6 | 18 | -0.071 | 0.029 | 0.016 | 0.932 | 0.880 | 0.987 | 17.560 | 0.417 | 0.013 | 0.009 | 0.161 |
| SLC16A3 | 21 | -0.058 | 0.022 | 0.009 | 0.944 | 0.904 | 0.985 | 22.792 | 0.299 | -0.012 | 0.008 | 0.155 |
| SLC16A7 | 9 | -0.104 | 0.046 | 0.024 | 0.901 | 0.823 | 0.986 | 5.388 | 0.715 | -0.006 | 0.011 | 0.600 |
| SLC20A1 | 48 | 0.073 | 0.015 | 0.000 | 1.076 | 1.045 | 1.108 | 44.790 | 0.565 | 0.004 | 0.005 | 0.437 |
| SLC22A16 | 54 | -0.028 | 0.009 | 0.002 | 0.973 | 0.956 | 0.990 | 47.139 | 0.701 | -0.004 | 0.004 | 0.362 |
| SLC22A17 | 9 | -0.157 | 0.044 | 0.000 | 0.855 | 0.783 | 0.932 | 6.015 | 0.646 | -0.005 | 0.008 | 0.514 |
| SLC22A23 | 24 | -0.050 | 0.023 | 0.028 | 0.951 | 0.909 | 0.995 | 14.415 | 0.914 | -0.005 | 0.007 | 0.489 |
| SLC22A5 | 81 | 0.042 | 0.010 | 0.000 | 1.042 | 1.023 | 1.062 | 96.759 | 0.098 | -0.001 | 0.006 | 0.799 |
| SLC23A3 | 31 | 0.055 | 0.017 | 0.001 | 1.057 | 1.022 | 1.093 | 15.173 | 0.989 | -0.003 | 0.007 | 0.613 |
| SLC25A12 | 10 | 0.099 | 0.045 | 0.028 | 1.104 | 1.011 | 1.206 | 7.595 | 0.575 | 0.001 | 0.012 | 0.916 |
| SLC25A37 | 44 | -0.033 | 0.015 | 0.028 | 0.968 | 0.940 | 0.996 | 39.161 | 0.638 | -0.005 | 0.005 | 0.286 |
| SLC25A42 | 3 | 0.302 | 0.132 | 0.022 | 1.353 | 1.044 | 1.753 | 1.825 | 0.402 | 0.035 | 0.034 | 0.487 |
| SLC25A44 | 4 | -0.220 | 0.095 | 0.021 | 0.802 | 0.665 | 0.967 | 1.390 | 0.708 | -0.001 | 0.016 | 0.969 |
| SLC27A2 | 7 | -0.133 | 0.065 | 0.042 | 0.875 | 0.770 | 0.995 | 6.537 | 0.366 | -0.009 | 0.017 | 0.607 |
| SLC29A1 | 8 | 0.167 | 0.065 | 0.010 | 1.181 | 1.040 | 1.342 | 5.312 | 0.622 | -0.001 | 0.015 | 0.940 |
| SLC2A4RG | 5 | -0.192 | 0.052 | 0.000 | 0.825 | 0.745 | 0.914 | 4.920 | 0.296 | 0.019 | 0.021 | 0.433 |
| SLC2A6 | 3 | 0.150 | 0.067 | 0.026 | 1.162 | 1.019 | 1.325 | 0.250 | 0.883 | 0.000 | 0.025 | 0.993 |
| SLC2A9 | 33 | 0.067 | 0.021 | 0.002 | 1.069 | 1.026 | 1.114 | 31.746 | 0.479 | -0.002 | 0.008 | 0.779 |
| SLC31A1 | 25 | 0.045 | 0.015 | 0.003 | 1.046 | 1.015 | 1.078 | 12.860 | 0.968 | -0.006 | 0.007 | 0.429 |
| SLC31A2 | 20 | 0.103 | 0.029 | 0.000 | 1.108 | 1.047 | 1.173 | 11.298 | 0.913 | 0.000 | 0.008 | 0.982 |
| SLC35A1 | 10 | 0.108 | 0.043 | 0.011 | 1.115 | 1.025 | 1.212 | 4.107 | 0.904 | -0.007 | 0.014 | 0.661 |
| SLC35B2 | 9 | 0.135 | 0.048 | 0.005 | 1.144 | 1.041 | 1.258 | 8.529 | 0.384 | 0.001 | 0.011 | 0.953 |
| SLC35B4 | 16 | 0.073 | 0.037 | 0.049 | 1.076 | 1.000 | 1.157 | 13.066 | 0.597 | 0.009 | 0.008 | 0.284 |
| SLC35E2B | 7 | 0.058 | 0.021 | 0.006 | 1.060 | 1.017 | 1.105 | 2.899 | 0.821 | 0.006 | 0.010 | 0.565 |
| SLC35E3 | 31 | -0.044 | 0.022 | 0.041 | 0.957 | 0.917 | 0.998 | 29.767 | 0.478 | -0.010 | 0.006 | 0.089 |
| SLC36A1 | 48 | 0.041 | 0.012 | 0.001 | 1.042 | 1.017 | 1.067 | 42.786 | 0.648 | -0.006 | 0.004 | 0.100 |
| SLC37A4 | 17 | 0.097 | 0.043 | 0.025 | 1.102 | 1.013 | 1.200 | 17.035 | 0.383 | 0.001 | 0.012 | 0.913 |
| SLC38A10 | 18 | -0.045 | 0.021 | 0.033 | 0.956 | 0.917 | 0.996 | 14.382 | 0.640 | -0.014 | 0.008 | 0.116 |
| SLC38A7 | 6 | 0.115 | 0.051 | 0.024 | 1.122 | 1.015 | 1.240 | 1.384 | 0.926 | 0.004 | 0.016 | 0.811 |
| SLC39A3 | 20 | 0.033 | 0.016 | 0.044 | 1.033 | 1.001 | 1.066 | 12.766 | 0.850 | 0.005 | 0.009 | 0.602 |
| SLC41A1 | 20 | 0.080 | 0.034 | 0.018 | 1.083 | 1.014 | 1.157 | 15.094 | 0.717 | 0.005 | 0.012 | 0.677 |
| SLC45A3 | 7 | -0.182 | 0.071 | 0.010 | 0.833 | 0.725 | 0.957 | 4.252 | 0.643 | 0.004 | 0.017 | 0.835 |
| SLC51A | 9 | -0.138 | 0.052 | 0.008 | 0.871 | 0.786 | 0.964 | 8.361 | 0.399 | -0.021 | 0.013 | 0.157 |
| SLC5A11 | 24 | -0.040 | 0.020 | 0.045 | 0.960 | 0.923 | 0.999 | 19.175 | 0.691 | 0.007 | 0.006 | 0.263 |
| SLC6A16 | 7 | -0.223 | 0.042 | 0.000 | 0.800 | 0.736 | 0.869 | 3.763 | 0.709 | -0.011 | 0.015 | 0.486 |
| SLC7A6OS | 7 | 0.123 | 0.049 | 0.012 | 1.131 | 1.028 | 1.244 | 5.649 | 0.464 | 0.026 | 0.016 | 0.171 |
| SLC7A8 | 32 | -0.031 | 0.014 | 0.028 | 0.970 | 0.943 | 0.997 | 28.433 | 0.599 | -0.002 | 0.005 | 0.741 |
| SLC8A1-AS1 | 8 | 0.064 | 0.025 | 0.012 | 1.066 | 1.014 | 1.120 | 1.670 | 0.976 | 0.005 | 0.016 | 0.762 |
| SLITRK5 | 6 | 0.158 | 0.074 | 0.032 | 1.171 | 1.013 | 1.354 | 4.780 | 0.443 | 0.022 | 0.017 | 0.267 |
| SMARCAD1 | 13 | 0.092 | 0.044 | 0.035 | 1.097 | 1.007 | 1.195 | 10.161 | 0.602 | -0.010 | 0.013 | 0.456 |
| SMARCD2 | 16 | -0.081 | 0.027 | 0.003 | 0.922 | 0.875 | 0.972 | 14.732 | 0.471 | -0.003 | 0.014 | 0.819 |
| SMC2 | 15 | -0.085 | 0.040 | 0.033 | 0.918 | 0.849 | 0.993 | 11.457 | 0.650 | -0.004 | 0.010 | 0.706 |
| SMC4 | 7 | -0.094 | 0.046 | 0.042 | 0.911 | 0.832 | 0.996 | 3.264 | 0.775 | 0.004 | 0.018 | 0.829 |
| SMIM14 | 19 | 0.160 | 0.036 | 0.000 | 1.173 | 1.095 | 1.258 | 14.095 | 0.723 | -0.004 | 0.009 | 0.667 |
| SMIM4 | 7 | 0.159 | 0.048 | 0.001 | 1.172 | 1.066 | 1.288 | 5.407 | 0.493 | 0.000 | 0.017 | 0.991 |
| SMPD3 | 5 | 0.217 | 0.075 | 0.004 | 1.243 | 1.072 | 1.440 | 2.528 | 0.640 | 0.001 | 0.017 | 0.970 |
| SMPDL3A | 41 | -0.041 | 0.016 | 0.011 | 0.960 | 0.931 | 0.991 | 46.862 | 0.212 | 0.003 | 0.006 | 0.639 |
| SNCA | 16 | -0.068 | 0.032 | 0.033 | 0.934 | 0.877 | 0.995 | 13.608 | 0.555 | -0.004 | 0.010 | 0.661 |
| SNHG15 | 21 | 0.068 | 0.025 | 0.006 | 1.070 | 1.020 | 1.123 | 21.925 | 0.345 | 0.008 | 0.010 | 0.430 |
| SNORD83 | 13 | -0.088 | 0.016 | 0.000 | 0.915 | 0.887 | 0.945 | 12.086 | 0.439 | -0.015 | 0.010 | 0.151 |
| snoU13 | 12 | -0.028 | 0.012 | 0.022 | 0.972 | 0.950 | 0.996 | 4.975 | 0.932 | -0.006 | 0.007 | 0.463 |
| SNRNP25 | 21 | 0.038 | 0.013 | 0.003 | 1.038 | 1.013 | 1.065 | 15.207 | 0.764 | -0.001 | 0.006 | 0.862 |
| SNRNP27 | 38 | 0.038 | 0.018 | 0.036 | 1.038 | 1.003 | 1.076 | 38.709 | 0.392 | -0.010 | 0.006 | 0.086 |
| SNRNP35 | 6 | -0.148 | 0.074 | 0.045 | 0.862 | 0.746 | 0.996 | 4.700 | 0.454 | -0.052 | 0.028 | 0.139 |
| SNRPD2 | 17 | -0.067 | 0.032 | 0.036 | 0.935 | 0.878 | 0.996 | 18.962 | 0.271 | 0.000 | 0.009 | 0.961 |
| SNTB1 | 12 | 0.129 | 0.047 | 0.006 | 1.138 | 1.038 | 1.248 | 8.819 | 0.639 | 0.010 | 0.013 | 0.470 |
| SNW1 | 19 | -0.073 | 0.031 | 0.019 | 0.930 | 0.874 | 0.988 | 10.795 | 0.903 | -0.007 | 0.005 | 0.182 |
| SNX11 | 41 | -0.039 | 0.019 | 0.038 | 0.961 | 0.926 | 0.998 | 49.517 | 0.144 | -0.012 | 0.006 | 0.054 |
| SNX29 | 49 | 0.045 | 0.012 | 0.000 | 1.046 | 1.022 | 1.071 | 53.703 | 0.265 | -0.004 | 0.006 | 0.507 |
| SNX30 | 20 | -0.068 | 0.021 | 0.002 | 0.934 | 0.896 | 0.975 | 19.066 | 0.453 | 0.004 | 0.009 | 0.617 |
| SORBS3 | 7 | -0.122 | 0.060 | 0.041 | 0.885 | 0.787 | 0.995 | 4.197 | 0.650 | -0.032 | 0.022 | 0.205 |
| SOS2 | 8 | 0.126 | 0.051 | 0.014 | 1.134 | 1.026 | 1.254 | 5.928 | 0.548 | 0.013 | 0.018 | 0.492 |
| SOX8 | 13 | 0.102 | 0.048 | 0.032 | 1.107 | 1.009 | 1.215 | 11.053 | 0.524 | -0.032 | 0.017 | 0.083 |
| SP2 | 4 | 0.397 | 0.106 | 0.000 | 1.487 | 1.208 | 1.831 | 3.118 | 0.374 | 0.040 | 0.031 | 0.330 |
| SPATA20 | 108 | -0.023 | 0.008 | 0.003 | 0.977 | 0.962 | 0.992 | 128.903 | 0.073 | 0.002 | 0.003 | 0.495 |
| SPATC1L | 45 | -0.020 | 0.010 | 0.046 | 0.980 | 0.960 | 1.000 | 30.661 | 0.936 | 0.001 | 0.005 | 0.825 |
| SPCS1 | 10 | -0.101 | 0.045 | 0.025 | 0.904 | 0.827 | 0.988 | 9.334 | 0.407 | -0.007 | 0.017 | 0.684 |
| SPDYC | 44 | -0.027 | 0.014 | 0.048 | 0.973 | 0.947 | 1.000 | 31.393 | 0.905 | -0.006 | 0.005 | 0.227 |
| SPINT2 | 27 | -0.077 | 0.026 | 0.003 | 0.926 | 0.880 | 0.973 | 18.766 | 0.846 | -0.010 | 0.006 | 0.140 |
| SPNS1 | 56 | 0.041 | 0.013 | 0.002 | 1.042 | 1.015 | 1.070 | 69.712 | 0.087 | -0.005 | 0.006 | 0.345 |
| SPOCD1 | 11 | 0.165 | 0.047 | 0.000 | 1.179 | 1.076 | 1.292 | 12.733 | 0.239 | -0.016 | 0.014 | 0.283 |
| SPON2 | 12 | -0.151 | 0.045 | 0.001 | 0.860 | 0.787 | 0.939 | 7.695 | 0.740 | -0.022 | 0.013 | 0.130 |
| SPRED2 | 9 | 0.127 | 0.059 | 0.032 | 1.136 | 1.011 | 1.276 | 5.964 | 0.651 | -0.034 | 0.018 | 0.101 |
| SPSB1 | 18 | 0.067 | 0.027 | 0.014 | 1.069 | 1.014 | 1.128 | 14.816 | 0.609 | 0.013 | 0.009 | 0.178 |
| SQSTM1 | 21 | -0.089 | 0.031 | 0.004 | 0.915 | 0.862 | 0.971 | 13.663 | 0.847 | 0.006 | 0.009 | 0.560 |
| SRP54 | 22 | -0.054 | 0.026 | 0.034 | 0.947 | 0.901 | 0.996 | 14.850 | 0.830 | -0.005 | 0.008 | 0.520 |
| SSH3 | 14 | 0.057 | 0.024 | 0.018 | 1.059 | 1.010 | 1.111 | 15.380 | 0.284 | -0.005 | 0.008 | 0.515 |
| SSR1 | 26 | -0.075 | 0.025 | 0.003 | 0.928 | 0.884 | 0.975 | 30.679 | 0.200 | -0.008 | 0.009 | 0.343 |
| SSR3 | 6 | -0.174 | 0.071 | 0.015 | 0.841 | 0.731 | 0.966 | 4.898 | 0.429 | -0.037 | 0.020 | 0.143 |
| SSR4P1 | 8 | -0.055 | 0.019 | 0.003 | 0.946 | 0.912 | 0.982 | 4.779 | 0.687 | -0.026 | 0.015 | 0.139 |
| SSU72 | 22 | 0.039 | 0.017 | 0.025 | 1.039 | 1.005 | 1.075 | 16.538 | 0.739 | -0.011 | 0.009 | 0.246 |
| ST20 | 52 | 0.021 | 0.009 | 0.024 | 1.021 | 1.003 | 1.039 | 51.742 | 0.445 | 0.006 | 0.004 | 0.092 |
| STAB1 | 13 | -0.075 | 0.025 | 0.003 | 0.928 | 0.884 | 0.974 | 11.753 | 0.466 | -0.011 | 0.009 | 0.225 |
| STAG3L1 | 23 | -0.038 | 0.010 | 0.000 | 0.963 | 0.943 | 0.982 | 20.418 | 0.557 | 0.009 | 0.007 | 0.214 |
| STAM | 13 | -0.117 | 0.041 | 0.005 | 0.889 | 0.820 | 0.965 | 9.950 | 0.620 | -0.011 | 0.012 | 0.360 |
| STAT2 | 9 | 0.123 | 0.046 | 0.007 | 1.130 | 1.034 | 1.236 | 5.755 | 0.675 | -0.002 | 0.012 | 0.872 |
| STAT5A | 5 | 0.133 | 0.068 | 0.050 | 1.143 | 1.000 | 1.306 | 0.866 | 0.929 | 0.004 | 0.014 | 0.797 |
| STEAP4 | 53 | -0.050 | 0.011 | 0.000 | 0.952 | 0.930 | 0.973 | 43.401 | 0.796 | 0.007 | 0.004 | 0.109 |
| STIM1 | 13 | -0.097 | 0.047 | 0.038 | 0.908 | 0.828 | 0.995 | 8.526 | 0.743 | 0.004 | 0.010 | 0.707 |
| STIM2 | 20 | -0.052 | 0.024 | 0.029 | 0.949 | 0.906 | 0.995 | 12.987 | 0.839 | -0.004 | 0.009 | 0.644 |
| STK17A | 3 | -0.246 | 0.110 | 0.025 | 0.782 | 0.631 | 0.970 | 0.979 | 0.613 | -0.032 | 0.042 | 0.581 |
| STK32C | 44 | 0.052 | 0.014 | 0.000 | 1.054 | 1.025 | 1.083 | 40.064 | 0.599 | -0.002 | 0.005 | 0.656 |
| STK38 | 6 | 0.132 | 0.053 | 0.012 | 1.141 | 1.029 | 1.265 | 3.121 | 0.681 | -0.010 | 0.022 | 0.674 |
| STMN1 | 6 | 0.145 | 0.049 | 0.003 | 1.156 | 1.050 | 1.274 | 1.897 | 0.863 | -0.006 | 0.013 | 0.669 |
| STRADA | 4 | -0.224 | 0.065 | 0.001 | 0.799 | 0.704 | 0.907 | 0.031 | 0.999 | 0.002 | 0.014 | 0.907 |
| STRN3 | 10 | -0.152 | 0.054 | 0.005 | 0.859 | 0.773 | 0.955 | 7.320 | 0.604 | -0.009 | 0.014 | 0.549 |
| STX7 | 6 | -0.107 | 0.052 | 0.039 | 0.899 | 0.812 | 0.995 | 1.027 | 0.960 | 0.006 | 0.014 | 0.700 |
| SUCLG2 | 55 | -0.034 | 0.014 | 0.015 | 0.967 | 0.941 | 0.993 | 32.651 | 0.991 | 0.008 | 0.006 | 0.185 |
| SUMF1 | 54 | 0.037 | 0.014 | 0.008 | 1.038 | 1.010 | 1.067 | 51.285 | 0.541 | 0.005 | 0.007 | 0.433 |
| SUPT20H | 13 | 0.068 | 0.024 | 0.004 | 1.071 | 1.022 | 1.123 | 9.269 | 0.680 | -0.003 | 0.006 | 0.672 |
| SUPT4H1 | 30 | -0.053 | 0.019 | 0.005 | 0.948 | 0.914 | 0.984 | 32.507 | 0.298 | 0.000 | 0.006 | 0.959 |
| SUPT5H | 4 | -0.213 | 0.093 | 0.022 | 0.809 | 0.674 | 0.970 | 4.698 | 0.195 | -0.020 | 0.071 | 0.804 |
| SURF1 | 26 | 0.022 | 0.011 | 0.036 | 1.023 | 1.001 | 1.044 | 26.102 | 0.402 | 0.000 | 0.007 | 0.949 |
| SUSD3 | 37 | 0.036 | 0.019 | 0.049 | 1.037 | 1.000 | 1.075 | 30.375 | 0.733 | 0.000 | 0.008 | 0.963 |
| SYCE1L | 21 | -0.075 | 0.034 | 0.028 | 0.928 | 0.868 | 0.992 | 29.052 | 0.087 | 0.007 | 0.011 | 0.519 |
| SYNGR1 | 49 | 0.027 | 0.013 | 0.047 | 1.027 | 1.000 | 1.055 | 39.538 | 0.803 | 0.000 | 0.005 | 0.945 |
| SYNGR3 | 18 | -0.142 | 0.030 | 0.000 | 0.867 | 0.818 | 0.920 | 19.523 | 0.299 | -0.015 | 0.008 | 0.086 |
| SYPL1 | 6 | -0.161 | 0.076 | 0.035 | 0.851 | 0.733 | 0.988 | 3.583 | 0.611 | 0.004 | 0.023 | 0.880 |
| SYS1 | 35 | -0.049 | 0.015 | 0.001 | 0.952 | 0.925 | 0.980 | 34.138 | 0.461 | 0.000 | 0.005 | 0.972 |
| TAGLN | 86 | 0.020 | 0.009 | 0.037 | 1.020 | 1.001 | 1.039 | 102.350 | 0.097 | -0.004 | 0.004 | 0.213 |
| TARSL2 | 14 | -0.066 | 0.033 | 0.046 | 0.936 | 0.877 | 0.999 | 7.898 | 0.850 | -0.006 | 0.011 | 0.605 |
| TBC1D15 | 19 | -0.083 | 0.032 | 0.009 | 0.920 | 0.865 | 0.979 | 14.531 | 0.694 | 0.004 | 0.008 | 0.669 |
| TBC1D30 | 27 | 0.052 | 0.015 | 0.000 | 1.053 | 1.023 | 1.084 | 26.721 | 0.424 | 0.006 | 0.007 | 0.449 |
| TBL2 | 11 | 0.105 | 0.036 | 0.003 | 1.111 | 1.036 | 1.191 | 7.083 | 0.718 | 0.007 | 0.008 | 0.406 |
| TBXAS1 | 37 | -0.050 | 0.021 | 0.016 | 0.951 | 0.913 | 0.991 | 31.195 | 0.696 | 0.008 | 0.006 | 0.204 |
| TCEB2 | 7 | -0.124 | 0.058 | 0.032 | 0.883 | 0.788 | 0.989 | 11.831 | 0.066 | -0.007 | 0.021 | 0.752 |
| TCF12 | 7 | -0.120 | 0.056 | 0.032 | 0.887 | 0.795 | 0.990 | 4.626 | 0.593 | 0.008 | 0.017 | 0.657 |
| TCF20 | 6 | 0.230 | 0.076 | 0.002 | 1.259 | 1.085 | 1.461 | 1.642 | 0.896 | 0.014 | 0.021 | 0.531 |
| TCFL5 | 31 | -0.052 | 0.020 | 0.010 | 0.950 | 0.913 | 0.988 | 40.091 | 0.103 | -0.005 | 0.007 | 0.473 |
| TCN1 | 16 | 0.066 | 0.024 | 0.006 | 1.069 | 1.019 | 1.121 | 14.899 | 0.459 | 0.020 | 0.011 | 0.083 |
| TCP11L2 | 25 | -0.049 | 0.021 | 0.017 | 0.952 | 0.914 | 0.991 | 26.850 | 0.312 | 0.005 | 0.008 | 0.534 |
| TEAD2 | 25 | 0.063 | 0.032 | 0.045 | 1.065 | 1.001 | 1.134 | 34.775 | 0.072 | -0.023 | 0.012 | 0.064 |
| TEF | 34 | -0.038 | 0.018 | 0.041 | 0.963 | 0.929 | 0.998 | 30.174 | 0.609 | -0.013 | 0.007 | 0.080 |
| TEK | 59 | -0.032 | 0.012 | 0.009 | 0.968 | 0.945 | 0.992 | 58.282 | 0.465 | -0.006 | 0.004 | 0.130 |
| TENC1 | 6 | -0.135 | 0.065 | 0.037 | 0.873 | 0.769 | 0.992 | 0.971 | 0.965 | -0.003 | 0.014 | 0.827 |
| TEPP | 7 | -0.134 | 0.054 | 0.014 | 0.875 | 0.787 | 0.973 | 6.840 | 0.336 | -0.005 | 0.015 | 0.766 |
| TERF2 | 10 | -0.119 | 0.050 | 0.018 | 0.888 | 0.805 | 0.980 | 10.266 | 0.329 | -0.013 | 0.009 | 0.182 |
| TEX10 | 6 | 0.162 | 0.056 | 0.004 | 1.175 | 1.052 | 1.313 | 5.860 | 0.320 | -0.026 | 0.022 | 0.297 |
| TEX14 | 5 | 0.257 | 0.081 | 0.001 | 1.293 | 1.104 | 1.514 | 2.973 | 0.562 | 0.013 | 0.019 | 0.551 |
| TFAM | 51 | -0.031 | 0.012 | 0.010 | 0.970 | 0.948 | 0.993 | 47.950 | 0.556 | -0.007 | 0.007 | 0.275 |
| TFB1M | 15 | 0.076 | 0.030 | 0.012 | 1.079 | 1.017 | 1.145 | 13.944 | 0.454 | -0.010 | 0.007 | 0.186 |
| TFRC | 36 | -0.046 | 0.020 | 0.022 | 0.955 | 0.918 | 0.993 | 28.748 | 0.763 | -0.005 | 0.005 | 0.347 |
| TGDS | 3 | -0.165 | 0.072 | 0.021 | 0.848 | 0.737 | 0.976 | 1.868 | 0.393 | 0.000 | 0.037 | 0.997 |
| TGFBR3 | 7 | 0.167 | 0.067 | 0.012 | 1.182 | 1.037 | 1.346 | 4.498 | 0.610 | -0.002 | 0.015 | 0.881 |
| THADA | 5 | -0.232 | 0.089 | 0.009 | 0.793 | 0.666 | 0.945 | 0.249 | 0.993 | -0.001 | 0.024 | 0.971 |
| THAP6 | 24 | -0.072 | 0.022 | 0.001 | 0.930 | 0.890 | 0.972 | 19.194 | 0.690 | 0.002 | 0.009 | 0.856 |
| THOC5 | 17 | -0.154 | 0.038 | 0.000 | 0.857 | 0.796 | 0.923 | 17.616 | 0.347 | 0.001 | 0.009 | 0.941 |
| THYN1 | 9 | 0.102 | 0.047 | 0.031 | 1.108 | 1.009 | 1.216 | 5.774 | 0.673 | 0.000 | 0.016 | 0.980 |
| TIAM1 | 23 | -0.063 | 0.023 | 0.008 | 0.939 | 0.897 | 0.984 | 16.141 | 0.809 | 0.003 | 0.006 | 0.675 |
| TIGD6 | 4 | -0.162 | 0.070 | 0.020 | 0.850 | 0.742 | 0.975 | 1.132 | 0.769 | -0.012 | 0.026 | 0.681 |
| TIMP2 | 19 | -0.048 | 0.023 | 0.039 | 0.953 | 0.911 | 0.998 | 15.506 | 0.627 | 0.006 | 0.007 | 0.385 |
| TIPARP-AS1 | 5 | 0.050 | 0.023 | 0.033 | 1.051 | 1.004 | 1.100 | 7.599 | 0.107 | 0.020 | 0.018 | 0.338 |
| TIRAP | 3 | -0.180 | 0.089 | 0.043 | 0.836 | 0.702 | 0.994 | 2.279 | 0.320 | -0.013 | 0.040 | 0.794 |
| TJP2 | 71 | 0.029 | 0.010 | 0.006 | 1.029 | 1.008 | 1.050 | 69.805 | 0.484 | 0.001 | 0.004 | 0.773 |
| TK2 | 22 | -0.075 | 0.018 | 0.000 | 0.928 | 0.896 | 0.961 | 20.877 | 0.466 | -0.004 | 0.006 | 0.535 |
| TLE1 | 7 | -0.183 | 0.079 | 0.021 | 0.833 | 0.713 | 0.973 | 3.371 | 0.761 | 0.001 | 0.016 | 0.941 |
| TM9SF2 | 10 | 0.115 | 0.049 | 0.019 | 1.121 | 1.019 | 1.234 | 8.063 | 0.528 | 0.013 | 0.015 | 0.430 |
| TMBIM6 | 5 | -0.203 | 0.090 | 0.024 | 0.816 | 0.684 | 0.973 | 3.398 | 0.494 | -0.003 | 0.073 | 0.970 |
| TMCC2 | 5 | 0.169 | 0.085 | 0.047 | 1.185 | 1.002 | 1.400 | 6.207 | 0.184 | -0.002 | 0.025 | 0.938 |
| TMED4 | 33 | -0.077 | 0.022 | 0.000 | 0.926 | 0.887 | 0.966 | 37.534 | 0.230 | -0.007 | 0.008 | 0.369 |
| TMED5 | 36 | -0.039 | 0.019 | 0.044 | 0.962 | 0.926 | 0.999 | 32.052 | 0.611 | -0.009 | 0.006 | 0.176 |
| TMEM106A | 9 | -0.100 | 0.043 | 0.019 | 0.905 | 0.832 | 0.984 | 6.945 | 0.543 | 0.023 | 0.025 | 0.385 |
| TMEM110 | 19 | 0.075 | 0.031 | 0.016 | 1.078 | 1.014 | 1.146 | 18.408 | 0.429 | 0.000 | 0.008 | 0.951 |
| TMEM123 | 7 | 0.111 | 0.056 | 0.048 | 1.117 | 1.001 | 1.247 | 6.570 | 0.362 | 0.019 | 0.014 | 0.240 |
| TMEM143 | 5 | 0.178 | 0.070 | 0.011 | 1.194 | 1.042 | 1.369 | 4.214 | 0.378 | 0.025 | 0.015 | 0.185 |
| TMEM170B | 18 | 0.085 | 0.022 | 0.000 | 1.089 | 1.043 | 1.137 | 15.295 | 0.574 | -0.004 | 0.008 | 0.628 |
| TMEM194A | 13 | 0.067 | 0.026 | 0.010 | 1.069 | 1.016 | 1.125 | 7.907 | 0.792 | 0.001 | 0.007 | 0.878 |
| TMEM205 | 17 | 0.055 | 0.027 | 0.045 | 1.056 | 1.001 | 1.115 | 10.115 | 0.861 | 0.003 | 0.008 | 0.699 |
| TMEM206 | 29 | -0.125 | 0.024 | 0.000 | 0.883 | 0.842 | 0.925 | 25.885 | 0.579 | 0.011 | 0.007 | 0.149 |
| TMEM218 | 26 | 0.046 | 0.021 | 0.028 | 1.047 | 1.005 | 1.090 | 24.022 | 0.518 | 0.010 | 0.007 | 0.185 |
| TMEM222 | 5 | -0.250 | 0.071 | 0.000 | 0.779 | 0.678 | 0.896 | 4.350 | 0.361 | -0.028 | 0.016 | 0.193 |
| TMEM252 | 11 | 0.069 | 0.034 | 0.042 | 1.072 | 1.002 | 1.146 | 4.029 | 0.946 | 0.007 | 0.010 | 0.506 |
| TMEM255B | 10 | -0.068 | 0.031 | 0.029 | 0.934 | 0.879 | 0.993 | 6.451 | 0.694 | -0.012 | 0.013 | 0.408 |
| TMEM258 | 22 | -0.059 | 0.023 | 0.011 | 0.942 | 0.900 | 0.987 | 21.099 | 0.453 | -0.006 | 0.007 | 0.438 |
| TMEM5 | 13 | 0.105 | 0.046 | 0.022 | 1.110 | 1.015 | 1.214 | 13.725 | 0.319 | -0.003 | 0.013 | 0.824 |
| TMEM71 | 25 | -0.050 | 0.023 | 0.027 | 0.951 | 0.910 | 0.994 | 27.793 | 0.269 | 0.001 | 0.007 | 0.873 |
| TMEM87B | 17 | -0.055 | 0.028 | 0.048 | 0.947 | 0.897 | 0.999 | 10.503 | 0.839 | 0.002 | 0.007 | 0.774 |
| TMEM99 | 36 | -0.051 | 0.018 | 0.004 | 0.950 | 0.918 | 0.984 | 40.898 | 0.227 | 0.003 | 0.007 | 0.642 |
| TMF1 | 3 | -0.257 | 0.105 | 0.014 | 0.773 | 0.630 | 0.949 | 1.800 | 0.407 | -0.065 | 0.051 | 0.427 |
| TMTC2 | 7 | -0.178 | 0.061 | 0.003 | 0.837 | 0.743 | 0.943 | 4.106 | 0.662 | -0.023 | 0.018 | 0.270 |
| TMX1 | 21 | 0.110 | 0.028 | 0.000 | 1.117 | 1.058 | 1.179 | 15.088 | 0.771 | -0.004 | 0.007 | 0.535 |
| TNFRSF10B | 20 | 0.099 | 0.018 | 0.000 | 1.104 | 1.065 | 1.144 | 13.265 | 0.825 | 0.006 | 0.007 | 0.428 |
| TNFRSF10D | 7 | 0.195 | 0.066 | 0.003 | 1.216 | 1.067 | 1.384 | 6.988 | 0.322 | 0.005 | 0.029 | 0.874 |
| TNFSF4 | 21 | -0.115 | 0.027 | 0.000 | 0.891 | 0.846 | 0.939 | 19.698 | 0.477 | -0.005 | 0.006 | 0.370 |
| TNKS2 | 11 | -0.071 | 0.036 | 0.049 | 0.932 | 0.869 | 1.000 | 14.537 | 0.150 | -0.003 | 0.012 | 0.779 |
| TOB2 | 3 | 0.149 | 0.071 | 0.036 | 1.161 | 1.010 | 1.335 | 0.147 | 0.929 | -0.005 | 0.036 | 0.915 |
| TOMM5 | 16 | -0.081 | 0.030 | 0.007 | 0.922 | 0.869 | 0.978 | 16.719 | 0.336 | -0.006 | 0.008 | 0.471 |
| TOMM7 | 37 | -0.079 | 0.020 | 0.000 | 0.924 | 0.888 | 0.961 | 35.844 | 0.476 | -0.004 | 0.006 | 0.466 |
| TOP3A | 17 | -0.078 | 0.037 | 0.037 | 0.925 | 0.860 | 0.995 | 13.025 | 0.671 | 0.000 | 0.009 | 0.968 |
| TP53INP2 | 4 | -0.165 | 0.073 | 0.025 | 0.848 | 0.734 | 0.979 | 3.567 | 0.312 | 0.016 | 0.036 | 0.709 |
| TPGS1 | 6 | 0.056 | 0.026 | 0.030 | 1.058 | 1.005 | 1.113 | 1.449 | 0.919 | 0.007 | 0.012 | 0.578 |
| TPP1 | 30 | 0.059 | 0.024 | 0.014 | 1.060 | 1.012 | 1.111 | 35.198 | 0.198 | 0.014 | 0.007 | 0.055 |
| TPPP3 | 7 | -0.129 | 0.064 | 0.042 | 0.879 | 0.776 | 0.995 | 0.783 | 0.993 | -0.002 | 0.011 | 0.875 |
| TPRA1 | 18 | -0.074 | 0.025 | 0.003 | 0.929 | 0.885 | 0.975 | 19.085 | 0.324 | -0.008 | 0.006 | 0.212 |
| TPSAB1 | 35 | -0.036 | 0.017 | 0.038 | 0.965 | 0.933 | 0.998 | 37.663 | 0.305 | 0.003 | 0.007 | 0.704 |
| TRABD2A | 13 | -0.057 | 0.026 | 0.028 | 0.944 | 0.897 | 0.994 | 3.869 | 0.986 | -0.003 | 0.009 | 0.768 |
| TRAF3IP1 | 3 | -0.178 | 0.088 | 0.043 | 0.837 | 0.705 | 0.994 | 0.061 | 0.970 | -0.005 | 0.024 | 0.876 |
| TRAF3IP2 | 29 | -0.073 | 0.022 | 0.001 | 0.929 | 0.890 | 0.970 | 27.392 | 0.497 | 0.000 | 0.008 | 0.976 |
| TRAPPC2P1 | 32 | -0.041 | 0.020 | 0.042 | 0.960 | 0.923 | 0.998 | 32.444 | 0.395 | -0.001 | 0.006 | 0.845 |
| TRAPPC3 | 9 | 0.169 | 0.051 | 0.001 | 1.185 | 1.072 | 1.309 | 6.617 | 0.578 | 0.013 | 0.010 | 0.262 |
| TRAV35 | 10 | 0.054 | 0.020 | 0.007 | 1.055 | 1.015 | 1.097 | 10.324 | 0.325 | 0.009 | 0.008 | 0.307 |
| TRBV11-2 | 28 | 0.023 | 0.010 | 0.019 | 1.023 | 1.004 | 1.042 | 26.809 | 0.474 | 0.003 | 0.008 | 0.688 |
| TREML2 | 17 | -0.089 | 0.033 | 0.007 | 0.915 | 0.857 | 0.976 | 14.698 | 0.547 | -0.010 | 0.010 | 0.330 |
| TRIB3 | 40 | -0.074 | 0.015 | 0.000 | 0.928 | 0.902 | 0.956 | 32.300 | 0.767 | -0.007 | 0.005 | 0.150 |
| TRIM36 | 24 | -0.136 | 0.027 | 0.000 | 0.873 | 0.827 | 0.920 | 14.211 | 0.921 | 0.007 | 0.008 | 0.372 |
| TRIM37 | 55 | 0.038 | 0.013 | 0.002 | 1.039 | 1.014 | 1.065 | 46.235 | 0.765 | 0.001 | 0.006 | 0.848 |
| TRIM44 | 5 | 0.131 | 0.047 | 0.005 | 1.140 | 1.040 | 1.250 | 2.689 | 0.611 | 0.017 | 0.013 | 0.287 |
| TRIM58 | 20 | 0.048 | 0.023 | 0.041 | 1.049 | 1.002 | 1.098 | 18.881 | 0.464 | 0.003 | 0.008 | 0.657 |
| TRIM59 | 11 | -0.156 | 0.052 | 0.003 | 0.855 | 0.772 | 0.948 | 2.333 | 0.993 | -0.008 | 0.014 | 0.575 |
| TRIM64B | 19 | -0.024 | 0.011 | 0.031 | 0.976 | 0.954 | 0.998 | 15.254 | 0.644 | 0.003 | 0.009 | 0.756 |
| TRIM73 | 10 | -0.063 | 0.023 | 0.007 | 0.939 | 0.897 | 0.983 | 8.730 | 0.463 | -0.007 | 0.016 | 0.683 |
| TRIOBP | 33 | 0.035 | 0.015 | 0.017 | 1.036 | 1.006 | 1.066 | 37.875 | 0.219 | 0.003 | 0.006 | 0.664 |
| TRIT1 | 27 | 0.043 | 0.018 | 0.019 | 1.044 | 1.007 | 1.081 | 26.662 | 0.427 | -0.005 | 0.006 | 0.381 |
| TRMT10A | 4 | -0.144 | 0.061 | 0.019 | 0.866 | 0.767 | 0.976 | 0.796 | 0.850 | -0.014 | 0.016 | 0.486 |
| TRMT1L | 5 | 0.168 | 0.054 | 0.002 | 1.183 | 1.063 | 1.316 | 1.699 | 0.791 | 0.012 | 0.010 | 0.312 |
| TRMT61A | 17 | 0.081 | 0.039 | 0.040 | 1.084 | 1.004 | 1.171 | 23.282 | 0.106 | -0.007 | 0.012 | 0.550 |
| TRMT61B | 8 | -0.086 | 0.034 | 0.011 | 0.917 | 0.858 | 0.980 | 3.728 | 0.811 | 0.007 | 0.012 | 0.602 |
| TRNT1 | 30 | 0.074 | 0.018 | 0.000 | 1.077 | 1.040 | 1.116 | 19.980 | 0.894 | 0.005 | 0.006 | 0.364 |
| TRPT1 | 13 | -0.107 | 0.036 | 0.003 | 0.898 | 0.836 | 0.965 | 6.968 | 0.860 | -0.009 | 0.010 | 0.357 |
| TSC22D2 | 11 | -0.089 | 0.043 | 0.036 | 0.914 | 0.841 | 0.994 | 11.670 | 0.308 | 0.002 | 0.014 | 0.889 |
| TSEN34 | 27 | 0.057 | 0.024 | 0.018 | 1.059 | 1.010 | 1.111 | 27.519 | 0.383 | 0.006 | 0.006 | 0.337 |
| TSPAN15 | 11 | -0.110 | 0.041 | 0.008 | 0.896 | 0.826 | 0.971 | 6.707 | 0.753 | -0.003 | 0.010 | 0.793 |
| TSPAN2 | 8 | 0.166 | 0.050 | 0.001 | 1.181 | 1.070 | 1.303 | 5.434 | 0.607 | 0.016 | 0.011 | 0.172 |
| TSPAN3 | 50 | -0.038 | 0.014 | 0.006 | 0.963 | 0.938 | 0.989 | 51.935 | 0.360 | 0.011 | 0.006 | 0.062 |
| TSPAN4 | 24 | 0.043 | 0.020 | 0.032 | 1.044 | 1.004 | 1.086 | 23.716 | 0.420 | 0.003 | 0.007 | 0.660 |
| TSSK6 | 5 | -0.206 | 0.074 | 0.006 | 0.814 | 0.704 | 0.942 | 0.751 | 0.945 | -0.009 | 0.016 | 0.599 |
| TST | 20 | -0.089 | 0.029 | 0.002 | 0.915 | 0.864 | 0.969 | 8.817 | 0.976 | -0.005 | 0.007 | 0.466 |
| TTC33 | 14 | -0.117 | 0.057 | 0.041 | 0.889 | 0.795 | 0.995 | 10.134 | 0.683 | 0.001 | 0.012 | 0.944 |
| TTC4 | 11 | -0.095 | 0.032 | 0.003 | 0.909 | 0.854 | 0.969 | 5.712 | 0.839 | 0.001 | 0.008 | 0.896 |
| TTC40 | 7 | -0.163 | 0.079 | 0.040 | 0.849 | 0.727 | 0.992 | 12.208 | 0.057 | 0.021 | 0.013 | 0.173 |
| TTL | 4 | 0.289 | 0.086 | 0.001 | 1.335 | 1.129 | 1.579 | 3.836 | 0.280 | 0.028 | 0.020 | 0.285 |
| TTLL5 | 22 | -0.052 | 0.026 | 0.049 | 0.949 | 0.902 | 1.000 | 22.597 | 0.366 | 0.001 | 0.009 | 0.920 |
| TUBB | 8 | 0.094 | 0.030 | 0.002 | 1.099 | 1.035 | 1.166 | 6.545 | 0.478 | 0.006 | 0.011 | 0.605 |
| TUBB2A | 36 | 0.021 | 0.010 | 0.040 | 1.021 | 1.001 | 1.042 | 22.444 | 0.950 | -0.001 | 0.007 | 0.925 |
| TUBGCP2 | 10 | 0.063 | 0.023 | 0.007 | 1.065 | 1.017 | 1.114 | 9.836 | 0.364 | 0.000 | 0.013 | 0.980 |
| TXNDC17 | 7 | -0.080 | 0.031 | 0.011 | 0.923 | 0.868 | 0.981 | 4.295 | 0.637 | -0.010 | 0.014 | 0.510 |
| TYW1B | 38 | 0.014 | 0.007 | 0.049 | 1.014 | 1.000 | 1.029 | 41.541 | 0.279 | -0.003 | 0.006 | 0.671 |
| U3 | 6 | -0.058 | 0.021 | 0.006 | 0.943 | 0.905 | 0.983 | 5.655 | 0.341 | -0.004 | 0.015 | 0.818 |
| UAP1 | 11 | -0.136 | 0.046 | 0.003 | 0.872 | 0.798 | 0.954 | 8.965 | 0.535 | 0.006 | 0.011 | 0.611 |
| UBAP1 | 9 | 0.116 | 0.059 | 0.049 | 1.123 | 1.001 | 1.261 | 6.351 | 0.608 | 0.001 | 0.014 | 0.919 |
| UBASH3A | 43 | -0.028 | 0.014 | 0.045 | 0.972 | 0.946 | 0.999 | 29.178 | 0.933 | -0.002 | 0.005 | 0.708 |
| UBE2D1 | 51 | -0.027 | 0.009 | 0.002 | 0.973 | 0.957 | 0.990 | 49.336 | 0.500 | -0.003 | 0.007 | 0.687 |
| UBE2I | 22 | -0.082 | 0.020 | 0.000 | 0.921 | 0.885 | 0.958 | 14.202 | 0.861 | 0.002 | 0.006 | 0.778 |
| UBE2J1 | 26 | 0.061 | 0.029 | 0.033 | 1.063 | 1.005 | 1.125 | 11.377 | 0.991 | 0.000 | 0.007 | 0.989 |
| UBE2K | 13 | 0.094 | 0.046 | 0.039 | 1.099 | 1.005 | 1.202 | 16.398 | 0.174 | 0.015 | 0.011 | 0.192 |
| UBE2Z | 45 | 0.063 | 0.022 | 0.004 | 1.065 | 1.021 | 1.111 | 57.040 | 0.090 | 0.005 | 0.008 | 0.576 |
| UBE3B | 25 | -0.075 | 0.019 | 0.000 | 0.928 | 0.894 | 0.964 | 23.113 | 0.513 | -0.006 | 0.005 | 0.234 |
| UBE4B | 11 | 0.072 | 0.035 | 0.040 | 1.075 | 1.003 | 1.152 | 9.959 | 0.444 | 0.010 | 0.010 | 0.363 |
| UBL3 | 15 | -0.082 | 0.042 | 0.049 | 0.921 | 0.848 | 1.000 | 14.018 | 0.448 | 0.000 | 0.009 | 0.986 |
| UBR5 | 8 | -0.129 | 0.057 | 0.022 | 0.879 | 0.786 | 0.982 | 3.750 | 0.808 | -0.001 | 0.015 | 0.927 |
| UBXN6 | 15 | -0.069 | 0.034 | 0.042 | 0.933 | 0.873 | 0.997 | 9.596 | 0.791 | 0.003 | 0.009 | 0.756 |
| UFSP1 | 40 | -0.055 | 0.022 | 0.014 | 0.946 | 0.906 | 0.989 | 38.830 | 0.478 | 0.000 | 0.007 | 0.947 |
| UGDH | 78 | -0.038 | 0.012 | 0.001 | 0.963 | 0.941 | 0.985 | 89.041 | 0.164 | 0.004 | 0.004 | 0.332 |
| UGGT1 | 4 | 0.231 | 0.092 | 0.012 | 1.260 | 1.053 | 1.507 | 1.176 | 0.759 | 0.018 | 0.025 | 0.536 |
| ULK2 | 11 | -0.099 | 0.038 | 0.010 | 0.906 | 0.840 | 0.977 | 4.970 | 0.893 | -0.006 | 0.010 | 0.548 |
| UMODL1 | 4 | 0.230 | 0.076 | 0.002 | 1.259 | 1.085 | 1.460 | 0.042 | 0.998 | -0.002 | 0.018 | 0.940 |
| UNC13D | 10 | -0.094 | 0.042 | 0.025 | 0.910 | 0.838 | 0.988 | 9.115 | 0.427 | -0.005 | 0.012 | 0.700 |
| UPB1 | 40 | 0.037 | 0.016 | 0.025 | 1.037 | 1.005 | 1.071 | 28.862 | 0.883 | 0.001 | 0.005 | 0.840 |
| USF1 | 41 | 0.044 | 0.017 | 0.011 | 1.045 | 1.010 | 1.081 | 34.657 | 0.709 | -0.001 | 0.007 | 0.903 |
| USMG5 | 71 | -0.034 | 0.010 | 0.001 | 0.967 | 0.948 | 0.986 | 66.346 | 0.602 | -0.007 | 0.004 | 0.069 |
| USO1 | 6 | -0.100 | 0.036 | 0.006 | 0.905 | 0.843 | 0.971 | 4.267 | 0.512 | 0.007 | 0.013 | 0.583 |
| USP6 | 13 | 0.104 | 0.043 | 0.015 | 1.109 | 1.020 | 1.206 | 9.982 | 0.618 | 0.005 | 0.008 | 0.566 |
| USP8 | 21 | 0.051 | 0.023 | 0.028 | 1.052 | 1.006 | 1.101 | 19.981 | 0.459 | 0.009 | 0.008 | 0.229 |
| UTF1 | 7 | -0.138 | 0.049 | 0.005 | 0.871 | 0.792 | 0.958 | 2.428 | 0.876 | 0.003 | 0.011 | 0.814 |
| VAC14 | 5 | -0.262 | 0.094 | 0.005 | 0.769 | 0.641 | 0.924 | 1.198 | 0.878 | -0.002 | 0.027 | 0.943 |
| VAMP1 | 43 | -0.026 | 0.012 | 0.023 | 0.974 | 0.952 | 0.996 | 29.553 | 0.926 | -0.008 | 0.005 | 0.118 |
| VAPA | 28 | 0.077 | 0.020 | 0.000 | 1.080 | 1.039 | 1.122 | 22.901 | 0.690 | 0.000 | 0.007 | 0.968 |
| VAT1 | 23 | -0.073 | 0.027 | 0.006 | 0.929 | 0.882 | 0.979 | 22.595 | 0.425 | -0.003 | 0.008 | 0.708 |
| VAV3-AS1 | 13 | 0.067 | 0.028 | 0.017 | 1.070 | 1.012 | 1.130 | 14.924 | 0.246 | 0.001 | 0.013 | 0.963 |
| VCL | 18 | -0.052 | 0.026 | 0.044 | 0.950 | 0.903 | 0.999 | 19.710 | 0.289 | 0.000 | 0.011 | 0.982 |
| VENTX | 27 | -0.057 | 0.024 | 0.017 | 0.945 | 0.902 | 0.990 | 21.610 | 0.710 | 0.011 | 0.008 | 0.175 |
| VIPR2 | 11 | 0.079 | 0.039 | 0.042 | 1.082 | 1.003 | 1.168 | 4.106 | 0.942 | -0.019 | 0.011 | 0.123 |
| VKORC1 | 5 | -0.238 | 0.077 | 0.002 | 0.788 | 0.677 | 0.918 | 2.810 | 0.590 | 0.001 | 0.020 | 0.968 |
| VNN1 | 83 | 0.018 | 0.008 | 0.036 | 1.018 | 1.001 | 1.035 | 83.180 | 0.443 | 0.006 | 0.004 | 0.116 |
| VNN2 | 63 | -0.022 | 0.010 | 0.029 | 0.979 | 0.960 | 0.998 | 52.631 | 0.796 | -0.006 | 0.004 | 0.145 |
| VNN3 | 75 | -0.032 | 0.012 | 0.007 | 0.968 | 0.946 | 0.991 | 71.168 | 0.572 | -0.005 | 0.004 | 0.249 |
| VPS11 | 15 | 0.056 | 0.028 | 0.048 | 1.057 | 1.000 | 1.117 | 7.821 | 0.898 | 0.002 | 0.009 | 0.838 |
| VPS29 | 27 | 0.105 | 0.027 | 0.000 | 1.111 | 1.053 | 1.171 | 37.857 | 0.062 | -0.011 | 0.007 | 0.135 |
| VPS52 | 3 | -0.221 | 0.078 | 0.005 | 0.802 | 0.688 | 0.935 | 1.221 | 0.543 | 0.010 | 0.023 | 0.745 |
| VRK1 | 7 | 0.092 | 0.038 | 0.014 | 1.097 | 1.019 | 1.180 | 4.571 | 0.600 | 0.002 | 0.018 | 0.910 |
| WAC | 18 | 0.077 | 0.034 | 0.022 | 1.080 | 1.011 | 1.154 | 19.826 | 0.283 | 0.007 | 0.012 | 0.598 |
| WASH4P | 3 | 0.093 | 0.036 | 0.010 | 1.097 | 1.022 | 1.178 | 0.433 | 0.805 | 0.010 | 0.029 | 0.786 |
| WBP1L | 7 | -0.137 | 0.061 | 0.024 | 0.872 | 0.774 | 0.982 | 7.405 | 0.285 | -0.007 | 0.028 | 0.809 |
| WDR1 | 11 | -0.099 | 0.046 | 0.033 | 0.906 | 0.828 | 0.992 | 14.202 | 0.164 | -0.010 | 0.010 | 0.338 |
| WDR52 | 14 | -0.081 | 0.039 | 0.039 | 0.922 | 0.854 | 0.996 | 7.162 | 0.894 | -0.012 | 0.009 | 0.212 |
| WDR55 | 46 | -0.046 | 0.017 | 0.006 | 0.955 | 0.925 | 0.987 | 33.119 | 0.905 | -0.002 | 0.008 | 0.785 |
| WDR59 | 8 | 0.185 | 0.060 | 0.002 | 1.203 | 1.070 | 1.352 | 7.804 | 0.350 | 0.015 | 0.023 | 0.537 |
| WDR63 | 20 | -0.075 | 0.028 | 0.006 | 0.928 | 0.879 | 0.979 | 23.307 | 0.224 | 0.002 | 0.010 | 0.834 |
| WDR81 | 19 | -0.055 | 0.022 | 0.014 | 0.947 | 0.906 | 0.989 | 10.983 | 0.895 | -0.001 | 0.007 | 0.903 |
| WDR86 | 41 | 0.048 | 0.017 | 0.004 | 1.049 | 1.016 | 1.084 | 45.206 | 0.264 | -0.011 | 0.007 | 0.146 |
| WIPI2 | 37 | 0.061 | 0.016 | 0.000 | 1.063 | 1.031 | 1.097 | 25.736 | 0.898 | 0.002 | 0.005 | 0.671 |
| WRB | 64 | 0.045 | 0.013 | 0.000 | 1.046 | 1.021 | 1.072 | 77.863 | 0.098 | 0.004 | 0.005 | 0.391 |
| WWC1 | 23 | 0.088 | 0.029 | 0.003 | 1.092 | 1.031 | 1.157 | 13.674 | 0.913 | 0.003 | 0.008 | 0.705 |
| XKR9 | 5 | 0.223 | 0.088 | 0.011 | 1.249 | 1.051 | 1.485 | 1.862 | 0.761 | 0.012 | 0.035 | 0.756 |
| XPNPEP1 | 41 | 0.062 | 0.023 | 0.006 | 1.064 | 1.018 | 1.113 | 34.118 | 0.732 | 0.001 | 0.006 | 0.880 |
| XRN2 | 33 | 0.047 | 0.018 | 0.007 | 1.048 | 1.013 | 1.085 | 33.660 | 0.387 | 0.008 | 0.006 | 0.224 |
| XXbac-BPG248L24.11 | 13 | 0.045 | 0.015 | 0.002 | 1.046 | 1.016 | 1.077 | 11.942 | 0.450 | -0.001 | 0.013 | 0.964 |
| XXyac-YX65C7_A.2 | 7 | -0.091 | 0.033 | 0.006 | 0.913 | 0.856 | 0.974 | 7.050 | 0.316 | -0.014 | 0.013 | 0.355 |
| YIF1A | 5 | -0.160 | 0.078 | 0.041 | 0.852 | 0.731 | 0.993 | 5.889 | 0.208 | -0.013 | 0.013 | 0.372 |
| YJEFN3 | 8 | 0.115 | 0.054 | 0.033 | 1.122 | 1.010 | 1.248 | 4.220 | 0.754 | -0.009 | 0.013 | 0.541 |
| YTHDC2 | 28 | 0.111 | 0.028 | 0.000 | 1.118 | 1.058 | 1.182 | 34.724 | 0.146 | 0.006 | 0.007 | 0.427 |
| YWHAH | 39 | -0.062 | 0.019 | 0.001 | 0.940 | 0.905 | 0.975 | 34.132 | 0.649 | -0.007 | 0.006 | 0.303 |
| Z83844.1 | 3 | -0.072 | 0.033 | 0.031 | 0.931 | 0.872 | 0.993 | 1.323 | 0.516 | -0.018 | 0.015 | 0.456 |
| Z97634.5 | 3 | -0.128 | 0.055 | 0.020 | 0.880 | 0.791 | 0.980 | 0.562 | 0.755 | -0.019 | 0.026 | 0.592 |
| ZBED2 | 4 | -0.245 | 0.087 | 0.005 | 0.783 | 0.660 | 0.928 | 0.608 | 0.895 | -0.014 | 0.022 | 0.589 |
| ZBED3 | 24 | -0.076 | 0.026 | 0.004 | 0.927 | 0.881 | 0.975 | 21.607 | 0.544 | 0.002 | 0.006 | 0.747 |
| ZBED5 | 10 | 0.118 | 0.051 | 0.022 | 1.126 | 1.018 | 1.245 | 16.415 | 0.059 | 0.013 | 0.011 | 0.259 |
| ZBTB24 | 5 | 0.160 | 0.063 | 0.012 | 1.173 | 1.036 | 1.328 | 3.254 | 0.516 | -0.009 | 0.018 | 0.645 |
| ZC3H12C | 33 | 0.055 | 0.018 | 0.002 | 1.057 | 1.020 | 1.095 | 22.174 | 0.903 | -0.001 | 0.005 | 0.892 |
| ZC3H18 | 3 | 0.172 | 0.086 | 0.046 | 1.188 | 1.003 | 1.406 | 0.167 | 0.920 | 0.008 | 0.060 | 0.912 |
| ZC3H3 | 25 | 0.047 | 0.020 | 0.022 | 1.048 | 1.007 | 1.091 | 15.317 | 0.911 | 0.001 | 0.007 | 0.868 |
| ZC3H8 | 12 | 0.163 | 0.054 | 0.002 | 1.177 | 1.059 | 1.308 | 8.077 | 0.706 | -0.002 | 0.012 | 0.851 |
| ZCCHC6 | 8 | -0.156 | 0.068 | 0.022 | 0.855 | 0.748 | 0.977 | 5.202 | 0.635 | 0.012 | 0.012 | 0.388 |
| ZCRB1 | 18 | -0.139 | 0.038 | 0.000 | 0.870 | 0.807 | 0.939 | 14.220 | 0.651 | -0.002 | 0.009 | 0.821 |
| ZDHHC1 | 4 | -0.156 | 0.059 | 0.009 | 0.856 | 0.762 | 0.961 | 3.977 | 0.264 | -0.022 | 0.012 | 0.197 |
| ZDHHC20 | 19 | -0.075 | 0.033 | 0.022 | 0.927 | 0.870 | 0.989 | 16.043 | 0.590 | 0.000 | 0.009 | 0.980 |
| ZDHHC4 | 55 | -0.049 | 0.015 | 0.001 | 0.953 | 0.925 | 0.981 | 65.093 | 0.143 | -0.005 | 0.006 | 0.332 |
| ZDHHC5 | 27 | 0.071 | 0.032 | 0.024 | 1.074 | 1.009 | 1.143 | 30.653 | 0.241 | -0.004 | 0.008 | 0.617 |
| ZFAND3 | 10 | 0.099 | 0.038 | 0.009 | 1.104 | 1.025 | 1.190 | 5.654 | 0.774 | -0.010 | 0.009 | 0.304 |
| ZFHX3 | 12 | -0.138 | 0.063 | 0.030 | 0.871 | 0.770 | 0.987 | 17.098 | 0.105 | -0.008 | 0.014 | 0.609 |
| ZFP30 | 28 | -0.046 | 0.023 | 0.044 | 0.955 | 0.913 | 0.999 | 26.976 | 0.465 | -0.008 | 0.007 | 0.279 |
| ZFP36L1 | 13 | 0.093 | 0.038 | 0.015 | 1.097 | 1.018 | 1.182 | 6.822 | 0.869 | 0.009 | 0.009 | 0.379 |
| ZFYVE19 | 58 | 0.066 | 0.017 | 0.000 | 1.068 | 1.034 | 1.103 | 70.819 | 0.103 | 0.004 | 0.006 | 0.540 |
| ZKSCAN4 | 13 | 0.077 | 0.035 | 0.026 | 1.080 | 1.009 | 1.157 | 12.137 | 0.435 | 0.006 | 0.010 | 0.539 |
| ZKSCAN5 | 13 | 0.129 | 0.037 | 0.000 | 1.138 | 1.059 | 1.223 | 14.849 | 0.250 | 0.011 | 0.009 | 0.220 |
| ZMAT3 | 34 | -0.063 | 0.019 | 0.001 | 0.939 | 0.904 | 0.975 | 24.093 | 0.871 | -0.001 | 0.006 | 0.919 |
| ZMIZ2 | 47 | -0.039 | 0.018 | 0.029 | 0.962 | 0.928 | 0.996 | 61.849 | 0.059 | -0.009 | 0.008 | 0.288 |
| ZMPSTE24 | 9 | 0.185 | 0.053 | 0.000 | 1.203 | 1.084 | 1.334 | 4.036 | 0.854 | -0.003 | 0.015 | 0.857 |
| ZNF101 | 14 | 0.113 | 0.044 | 0.010 | 1.119 | 1.027 | 1.220 | 7.758 | 0.859 | -0.007 | 0.013 | 0.609 |
| ZNF124 | 27 | 0.071 | 0.029 | 0.014 | 1.073 | 1.014 | 1.136 | 37.527 | 0.067 | -0.003 | 0.007 | 0.674 |
| ZNF143 | 25 | 0.066 | 0.019 | 0.001 | 1.068 | 1.028 | 1.110 | 23.446 | 0.494 | 0.003 | 0.005 | 0.570 |
| ZNF16 | 6 | 0.188 | 0.080 | 0.018 | 1.207 | 1.033 | 1.411 | 4.855 | 0.434 | -0.024 | 0.018 | 0.253 |
| ZNF175 | 40 | -0.048 | 0.017 | 0.003 | 0.953 | 0.922 | 0.984 | 43.022 | 0.303 | 0.009 | 0.005 | 0.103 |
| ZNF19 | 4 | 0.394 | 0.138 | 0.004 | 1.484 | 1.133 | 1.943 | 3.869 | 0.276 | -0.017 | 0.044 | 0.732 |
| ZNF197 | 23 | -0.095 | 0.024 | 0.000 | 0.910 | 0.868 | 0.953 | 14.319 | 0.890 | -0.007 | 0.008 | 0.399 |
| ZNF213 | 26 | -0.030 | 0.015 | 0.037 | 0.970 | 0.943 | 0.998 | 23.527 | 0.547 | 0.014 | 0.007 | 0.060 |
| ZNF252P | 17 | 0.036 | 0.014 | 0.008 | 1.037 | 1.009 | 1.065 | 16.263 | 0.435 | 0.013 | 0.010 | 0.206 |
| ZNF260 | 10 | -0.089 | 0.042 | 0.035 | 0.915 | 0.842 | 0.994 | 5.121 | 0.824 | -0.004 | 0.012 | 0.737 |
| ZNF302 | 15 | -0.070 | 0.030 | 0.020 | 0.932 | 0.879 | 0.989 | 19.730 | 0.139 | -0.002 | 0.009 | 0.842 |
| ZNF32 | 17 | -0.103 | 0.037 | 0.006 | 0.902 | 0.838 | 0.971 | 14.928 | 0.530 | 0.008 | 0.011 | 0.450 |
| ZNF320 | 25 | 0.075 | 0.024 | 0.002 | 1.078 | 1.029 | 1.129 | 23.946 | 0.465 | -0.004 | 0.008 | 0.602 |
| ZNF333 | 43 | 0.029 | 0.014 | 0.039 | 1.030 | 1.001 | 1.058 | 30.105 | 0.915 | 0.011 | 0.006 | 0.079 |
| ZNF354A | 31 | -0.043 | 0.022 | 0.048 | 0.958 | 0.919 | 1.000 | 41.754 | 0.075 | 0.002 | 0.007 | 0.730 |
| ZNF362 | 25 | 0.082 | 0.023 | 0.000 | 1.085 | 1.036 | 1.136 | 23.233 | 0.506 | 0.008 | 0.008 | 0.285 |
| ZNF385D | 15 | -0.100 | 0.041 | 0.014 | 0.905 | 0.835 | 0.980 | 7.531 | 0.912 | 0.001 | 0.009 | 0.914 |
| ZNF391 | 16 | -0.056 | 0.025 | 0.026 | 0.946 | 0.900 | 0.993 | 13.799 | 0.541 | -0.004 | 0.008 | 0.608 |
| ZNF420 | 13 | -0.113 | 0.043 | 0.008 | 0.893 | 0.821 | 0.971 | 6.806 | 0.870 | -0.003 | 0.015 | 0.865 |
| ZNF438 | 17 | -0.093 | 0.041 | 0.023 | 0.911 | 0.840 | 0.987 | 18.703 | 0.284 | 0.020 | 0.010 | 0.054 |
| ZNF460 | 8 | -0.152 | 0.054 | 0.005 | 0.859 | 0.772 | 0.956 | 2.615 | 0.918 | 0.007 | 0.010 | 0.544 |
| ZNF501 | 14 | -0.120 | 0.037 | 0.001 | 0.887 | 0.824 | 0.953 | 9.132 | 0.763 | 0.004 | 0.010 | 0.658 |
| ZNF502 | 52 | -0.051 | 0.012 | 0.000 | 0.950 | 0.929 | 0.972 | 49.819 | 0.521 | -0.005 | 0.004 | 0.213 |
| ZNF506 | 8 | 0.129 | 0.065 | 0.048 | 1.138 | 1.001 | 1.294 | 13.448 | 0.062 | 0.011 | 0.024 | 0.673 |
| ZNF512B | 6 | -0.246 | 0.072 | 0.001 | 0.782 | 0.679 | 0.900 | 3.419 | 0.636 | -0.017 | 0.017 | 0.390 |
| ZNF576 | 3 | 0.178 | 0.089 | 0.045 | 1.195 | 1.004 | 1.422 | 0.547 | 0.761 | -0.008 | 0.104 | 0.952 |
| ZNF586 | 40 | 0.042 | 0.018 | 0.019 | 1.043 | 1.007 | 1.081 | 39.602 | 0.443 | 0.004 | 0.005 | 0.388 |
| ZNF598 | 7 | -0.122 | 0.035 | 0.001 | 0.885 | 0.826 | 0.948 | 6.128 | 0.409 | -0.015 | 0.011 | 0.225 |
| ZNF613 | 37 | 0.057 | 0.018 | 0.002 | 1.059 | 1.022 | 1.097 | 19.557 | 0.988 | -0.002 | 0.006 | 0.797 |
| ZNF641 | 83 | 0.023 | 0.010 | 0.024 | 1.023 | 1.003 | 1.044 | 100.932 | 0.077 | 0.003 | 0.004 | 0.519 |
| ZNF660 | 3 | -0.250 | 0.110 | 0.023 | 0.779 | 0.628 | 0.966 | 0.124 | 0.940 | -0.018 | 0.057 | 0.802 |
| ZNF664 | 13 | 0.097 | 0.046 | 0.034 | 1.102 | 1.007 | 1.205 | 11.031 | 0.526 | -0.013 | 0.012 | 0.317 |
| ZNF668 | 27 | -0.154 | 0.024 | 0.000 | 0.857 | 0.818 | 0.898 | 26.466 | 0.438 | -0.010 | 0.010 | 0.325 |
| ZNF671 | 19 | -0.061 | 0.031 | 0.049 | 0.941 | 0.886 | 1.000 | 20.059 | 0.330 | 0.006 | 0.008 | 0.465 |
| ZNF675 | 5 | 0.235 | 0.082 | 0.004 | 1.265 | 1.078 | 1.484 | 0.809 | 0.937 | 0.021 | 0.047 | 0.687 |
| ZNF697 | 11 | 0.094 | 0.039 | 0.017 | 1.099 | 1.017 | 1.187 | 3.142 | 0.978 | 0.011 | 0.011 | 0.365 |
| ZNF707 | 10 | -0.089 | 0.035 | 0.011 | 0.915 | 0.854 | 0.979 | 7.936 | 0.541 | 0.008 | 0.008 | 0.357 |
| ZNF786 | 18 | 0.043 | 0.019 | 0.026 | 1.044 | 1.005 | 1.084 | 13.128 | 0.728 | -0.009 | 0.009 | 0.313 |
| ZNF80 | 18 | 0.057 | 0.029 | 0.047 | 1.059 | 1.001 | 1.121 | 7.582 | 0.975 | -0.016 | 0.012 | 0.189 |
| ZNF835 | 9 | -0.175 | 0.072 | 0.015 | 0.839 | 0.729 | 0.967 | 14.308 | 0.074 | -0.020 | 0.014 | 0.176 |
| ZNHIT3 | 13 | -0.064 | 0.032 | 0.045 | 0.938 | 0.881 | 0.998 | 10.554 | 0.567 | 0.005 | 0.011 | 0.675 |
| ZSCAN9 | 27 | 0.048 | 0.013 | 0.000 | 1.049 | 1.023 | 1.075 | 17.987 | 0.876 | 0.012 | 0.008 | 0.139 |
| ZSWIM7 | 69 | 0.015 | 0.007 | 0.024 | 1.015 | 1.002 | 1.029 | 60.144 | 0.740 | 0.000 | 0.004 | 0.920 |
| ZYX | 38 | -0.038 | 0.014 | 0.006 | 0.963 | 0.937 | 0.989 | 22.485 | 0.971 | 0.004 | 0.005 | 0.431 |
| ZZZ3 | 9 | 0.185 | 0.073 | 0.011 | 1.203 | 1.043 | 1.388 | 15.439 | 0.051 | 0.004 | 0.023 | 0.872 |

Table S2 Colocalization Analysis of Blood eQTLs and COPD GWAS (P(H₄) ≥ 0.75)

| Gene ID | No. of SNPs | PP(H₀): No association | PP(H₁): Expression only | PP(H₂): GWAS only | PP(H₃): Independent signals | PP(H₄): Shared causal variant |
| --- | --- | --- | --- | --- | --- | --- |
| AC116366.6 | 3 | 5.70909E-19 | 0.224327077 | 2.08717E-21 | 4.44816E-05 | 0.775628441 |
| ALG1L13P | 27 | 3.40809E-72 | 0.0171071 | 2.1266E-73 | 8.46479E-05 | 0.982808252 |
| ATF6B | 14 | 8.03214E-45 | 0.000423686 | 1.8973E-44 | 1.23114E-06 | 0.999575083 |
| BCKDK | 24 | 2.136E-204 | 0.040701994 | 7.2118E-206 | 0.000415338 | 0.958882668 |
| CCDC3 | 23 | 0 | 0.209188675 | 0 | 0.000147773 | 0.790663551 |
| CYP2F1P | 3 | 2.52618E-35 | 0.000655293 | 3.85321E-35 | 1.80977E-07 | 0.999344526 |
| FAM13A | 26 | 3.2449E-273 | 9.68616E-06 | 3.3501E-271 | 3.64732E-08 | 0.999990277 |
| FAM182B | 12 | 1.15847E-57 | 0.147655954 | 7.28985E-60 | 7.68766E-05 | 0.852267169 |
| FAM86B3P | 9 | 1.13225E-50 | 0.019715545 | 5.67978E-52 | 8.72654E-06 | 0.980275729 |
| GAL3ST4 | 24 | 4.7296E-166 | 0.006685469 | 7.0744E-167 | 6.69121E-06 | 0.99330784 |
| GTF2H3 | 4 | 2.44241E-54 | 0.04633967 | 5.08728E-56 | 1.15571E-05 | 0.953648773 |
| H1FNT | 8 | 2.57709E-61 | 0.234403599 | 9.12712E-64 | 6.46408E-05 | 0.76553176 |
| HIST1H4H | 53 | 0 | 0.152068326 | 0 | 0.00074374 | 0.847187934 |
| HLA-L | 15 | 4.1966E-131 | 0.032895451 | 1.253E-132 | 1.50805E-05 | 0.967089469 |
| IRF1 | 3 | 7.49916E-17 | 0.177603117 | 3.5961E-19 | 2.92986E-05 | 0.822367584 |
| ISPD | 8 | 5.73641E-59 | 0.07219066 | 1.15875E-60 | 0.000530971 | 0.927278369 |
| ITPKC | 4 | 1.40747E-22 | 0.005679529 | 2.46465E-23 | 2.33587E-07 | 0.994320237 |
| MTCH2 | 4 | 4.20682E-30 | 0.002624449 | 3.19027E-30 | 0.000993886 | 0.996381665 |
| PFKM | 20 | 6.67958E-93 | 0.219682135 | 3.21296E-95 | 0.000276657 | 0.780041208 |
| PIK3C2A | 31 | 0 | 0.248079247 | 0 | 0.00039908 | 0.751521673 |
| PILRA | 4 | 2.19126E-21 | 0.00946749 | 2.29385E-22 | 5.40077E-07 | 0.99053197 |
| PTGFR | 14 | 6.25508E-75 | 0.047985166 | 1.27433E-76 | 2.55993E-05 | 0.951989234 |
| PVRIG | 21 | 4.18250185542486e-317 | 0.008209675 | 5.08020035942387e-318 | 5.38885E-06 | 0.991784936 |
| RP11-664D1.1 | 37 | 0 | 0.102171863 | 0 | 0.000115582 | 0.897712554 |
| SDK1 | 15 | 7.39178E-43 | 0.244947619 | 2.43694E-45 | 5.25497E-05 | 0.754999832 |
| SENP1 | 3 | 1.80415E-36 | 0.160515298 | 9.74119E-39 | 2.72168E-05 | 0.839457485 |
| SLC2A4RG | 5 | 1.24097E-39 | 0.038296596 | 3.12496E-41 | 2.66811E-06 | 0.961700736 |
| TCEB2 | 8 | 9.19001E-95 | 0.197311405 | 3.95056E-97 | 4.5551E-05 | 0.802643044 |
| TMEM206 | 29 | 3.382E-194 | 0.17595443 | 2.0043E-196 | 0.00021894 | 0.823826631 |

Table S3 SMR Analysis of Blood eQTLs Associated with COPD (Pwalue < 0.05,Heter.p > 0.05)

| Gene symbol | Ensembl gene ID | SMR effect size (β) | 95% CI lower | 95% CI upper | SMR standard error | SMR P-value | HEIDI P-value | No. of SNPs (HEIDI) | Odds ratio | OR 95% CI lower | OR 95% CI upper |
| --- | --- | --- | --- | --- | --- | --- | --- | --- | --- | --- | --- |
| ENSG00000079387 | SENP1 | -0.34016 | -0.53019 | -0.15102 | 0.0965952 | 0.000429115 | 0.7684494 | 20 | 0.711656449 | 0.588907242 | 0.859990954 |
| ENSG00000125520 | SLC2A4RG | -0.269576 | -0.40389 | -0.13445 | 0.0688203 | 8.96213E-05 | 0.2957411 | 20 | 0.763703236 | 0.667334548 | 0.873988368 |
| ENSG00000085514 | PTGFR | -0.531311 | -0.78797 | -0.27617 | 0.13036 | 4.58707E-05 | 0.2744493 | 20 | 0.587833814 | 0.455291867 | 0.75896061 |
| ENSG00000158406 | HIST1H4H | 0.0767945 | 0.01763 | 0.13582 | 0.0301849 | 0.01095475 | 0.2595179 | 20 | 1.079820151 | 1.017788459 | 1.14563252 |
| ENSG00000125347 | IRF1 | -0.597364 | -0.94117 | -0.25355 | 0.175622 | 0.000670344 | 0.1780474 | 20 | 0.550260212 | 0.390009914 | 0.776355395 |
| ENSG00000138640 | FAM13A | -0.225068 | -0.30262 | -0.14748 | 0.0394953 | 1.208E-08 | 0.1138245 | 20 | 0.798461922 | 0.738984163 | 0.862726797 |
| ENSG00000151468 | CCDC3 | 0.120803 | 0.05463 | 0.18679 | 0.0337846 | 0.000349311 | 0.1123833 | 20 | 1.128402595 | 1.056102436 | 1.205652382 |
| ENSG00000146555 | SDK1 | -0.38458 | -0.60787 | -0.16217 | 0.113567 | 0.000708234 | 0.05436379 | 20 | 0.680736485 | 0.544890011 | 0.850450832 |

**Table S4** Two sample MR from blood DNA methylation to overall COPD (P < 0.05 and p_HEIDI > 0.05, egger_intercept_pval > 0.05)

| CpG ID | Gene ID | No. of SNPs | MR effect size (β) | MR standard error | pvalue | Odds ratio | OR 95% CI lower | OR 95% CI upper | Cochran’s Q statistic | Cochran’s Q P-value | MR-Egger intercept | MR-Egger intercept SE | MR-Egger intercept P-value |
| --- | --- | --- | --- | --- | --- | --- | --- | --- | --- | --- | --- | --- | --- |
| cg15587771 | SDK1 | 39 | -0.042294215 | 0.012226502145543 | 0.000541733327558621 | 0.958587708417728 | 0.935889224899267 | 0.981836707040252 | 49.5066780337014 | 0.100099679946098 | -0.009547227 | 0.00632614959857354 | 0.139748616019371 |
| cg17756105 | SDK1 | 10 | -0.121237964 | 0.0431168369430754 | 0.00492578717593017 | 0.88582314018931 | 0.814039030794148 | 0.963937361737238 | 7.48704857968569 | 0.586546107650051 | -0.0174582 | 0.0106636820581305 | 0.14023185082528 |
| cg09734932 | SDK1 | 14 | -0.089222646 | 0.0253206171483243 | 0.000425541236407199 | 0.914641909769851 | 0.870357653912247 | 0.961179371890475 | 5.29441060070232 | 0.968127321361226 | 0.0177672267665957 | 0.0134916310149748 | 0.212464621779971 |
| cg09832613 | SDK1 | 20 | -0.049472824 | 0.0178305402386187 | 0.00552676652873371 | 0.951731021934075 | 0.919044548374005 | 0.985580013193297 | 13.5503581346167 | 0.809244175073254 | 0.0101609635409921 | 0.00888595939873702 | 0.267817739020771 |
| cg22326929 | SDK1 | 3 | -0.237590054 | 0.0900933329695245 | 0.0083604701613527 | 0.788525878031794 | 0.660886616966882 | 0.940816540028333 | 3.7934137953847 | 0.15006197587887 | -0.041681981 | 0.0238276910652728 | 0.330607088583907 |
| cg13375629 | SDK1 | 7 | -0.109354125 | 0.0346922712427781 | 0.00162090874148911 | 0.896412918864862 | 0.837485794805524 | 0.959486269608213 | 6.46483755241378 | 0.373179050534794 | -0.017990841 | 0.0174268799304548 | 0.349228294470131 |
| cg03141780 | SDK1 | 23 | -0.043398146 | 0.017842259434321 | 0.0150023027000694 | 0.957530077088095 | 0.924623200926155 | 0.991608092474804 | 17.7687059555393 | 0.719610261797669 | 0.00978203476756232 | 0.0103658206284116 | 0.356063674629966 |
| cg13378643 | SDK1 | 20 | -0.050582116 | 0.0178854213178678 | 0.00468222648003928 | 0.95067585962764 | 0.917926880935665 | 0.984593227248669 | 10.9436792599331 | 0.925718374351866 | 0.00917099400937124 | 0.0106962400212507 | 0.402493898830861 |
| cg16321846 | SDK1 | 36 | 0.0515752427536644 | 0.0120430327022017 | 1.84739246702652e-05 | 1.05292840854452 | 1.0283657571617 | 1.07807774208663 | 36.7080218400009 | 0.38958932002239 | 0.00529913535019067 | 0.00668951856049905 | 0.433762801207372 |
| cg01023798 | SDK1 | 4 | 0.15175601210418 | 0.0501264644407876 | 0.00246615973182763 | 1.16387623007409 | 1.05496558105164 | 1.28403040180813 | 1.5346558217055 | 0.674295190040886 | -0.051965272 | 0.0554430584767615 | 0.447560925117888 |
| cg06110701 | SDK1 | 9 | -0.131666804 | 0.0568359817073611 | 0.0205249855390114 | 0.87663303685995 | 0.7842202802757 | 0.979935740815233 | 4.41546446821882 | 0.817829835298375 | -0.017270179 | 0.0221697557842526 | 0.46149942712602 |
| cg25144558 | SDK1 | 4 | 0.202468098407879 | 0.0614386076762645 | 0.00098262829194616 | 1.22442102351878 | 1.08550837686425 | 1.38111033943891 | 1.81727136190426 | 0.611183725638403 | -0.034792643 | 0.0392565162323196 | 0.46896473484428 |
| cg16339286 | SDK1 | 20 | -0.077853516 | 0.0245965407130016 | 0.00154964584628663 | 0.925099929348328 | 0.881559540080894 | 0.970790786521067 | 11.3864778557969 | 0.910152706533227 | 0.00717346025887597 | 0.00993846727762202 | 0.479697372238084 |
| cg02716317 | SDK1 | 8 | -0.109557031 | 0.0386876321769957 | 0.0046281575871528 | 0.896231050348556 | 0.830784545067307 | 0.96683321852575 | 5.06516423725603 | 0.65201104620655 | -0.012424915 | 0.0195166964264175 | 0.547869389132495 |
| cg12777588 | SDK1 | 18 | -0.066998732 | 0.0231151111254732 | 0.0037497392395187 | 0.935196387403375 | 0.893772196934796 | 0.978540489413018 | 19.4702654856223 | 0.302216197277641 | 0.00634585927573179 | 0.0107051851396461 | 0.561611488335878 |
| cg23320454 | SDK1 | 4 | 0.186545334166384 | 0.0859512448506096 | 0.0299794168626417 | 1.2050792521107 | 1.01824534326096 | 1.42619459394425 | 0.657055746102455 | 0.883255293168892 | 0.0148728774036429 | 0.0217879026440126 | 0.565304078501944 |
| cg25274735 | SDK1 | 6 | -0.126046903 | 0.050808125959316 | 0.0131072670633438 | 0.881573496997132 | 0.798012649379301 | 0.973884099722281 | 6.7032852107735 | 0.243658949173453 | -0.016359924 | 0.0262448594511753 | 0.566832557872249 |
| cg22703520 | SDK1 | 13 | -0.071910613 | 0.0230336852669645 | 0.00179641565896567 | 0.930614076684376 | 0.889534811733123 | 0.973590407367826 | 13.0695832126263 | 0.364003436019486 | -0.005072404 | 0.00874143575848159 | 0.573426234606619 |
| cg12266167 | SDK1 | 17 | -0.058561999 | 0.0240561950499693 | 0.0149171896447816 | 0.943119765882718 | 0.899683592343948 | 0.988653011311811 | 19.0603625208452 | 0.265545398941359 | 0.00556505240558154 | 0.00980211589121684 | 0.578611119384277 |
| cg18850427 | SDK1 | 3 | -0.196288093 | 0.0813302785891286 | 0.0158014792227591 | 0.821775453140929 | 0.7006859896194 | 0.963791063885547 | 0.803697732750397 | 0.669081858815969 | -0.062491644 | 0.0876492011985796 | 0.605689999148319 |
| cg03762823 | SDK1 | 14 | -0.0712036 | 0.0226354757857596 | 0.00165710281915794 | 0.931272265402029 | 0.890858982391781 | 0.973518872738514 | 11.2955162333114 | 0.586076259441042 | -0.003673468 | 0.00694934467324171 | 0.606717234458432 |
| cg15934004 | SDK1 | 5 | 0.130608670031873 | 0.0567603300028721 | 0.0213884937090096 | 1.13952176503192 | 1.01954701246557 | 1.2736144945796 | 3.79831386779931 | 0.433988626424331 | -0.015406762 | 0.0287772759769432 | 0.629531821248486 |
| cg04680535 | SDK1 | 6 | -0.227337895 | 0.0650350638224141 | 0.000472961055411344 | 0.79665155255869 | 0.701309049464595 | 0.904955806115276 | 4.39458613655372 | 0.494110093751716 | -0.011118955 | 0.0225057001285024 | 0.647171188816602 |
| cg11859398 | SDK1 | 15 | 0.0718390956467374 | 0.0261087557500433 | 0.00593170943030977 | 1.07448244125148 | 1.02088095343404 | 1.13089828218872 | 11.2620400118575 | 0.66533902959548 | 0.00426543752105009 | 0.0091969884268894 | 0.650470811051004 |
| cg00136968 | SDK1 | 11 | 0.0788059139714993 | 0.0324626986034828 | 0.0151997843056792 | 1.08199430171309 | 1.01529481120446 | 1.15307559540342 | 7.33517060664347 | 0.693469007424441 | -0.00615517 | 0.0154822125752452 | 0.700216114762724 |
| cg01982837 | SDK1 | 9 | -0.118556777 | 0.0354227302410186 | 0.000817170144093064 | 0.888201384942091 | 0.828626864649577 | 0.95205904354389 | 5.56838695379846 | 0.695452086473167 | 0.00561810373268092 | 0.0168937286901497 | 0.749206927487172 |
| cg14950237 | SDK1 | 7 | -0.108942423 | 0.039470599214651 | 0.00577853651865983 | 0.8967820501623 | 0.830020568382092 | 0.968913393388445 | 5.09143679832498 | 0.532140372011388 | -0.006810543 | 0.0204878317512146 | 0.753056628606499 |
| cg02491557 | SDK1 | 20 | -0.056723822 | 0.0177923951822835 | 0.0014321414063419 | 0.944854981261865 | 0.912472877911571 | 0.978386270130736 | 12.0978693288065 | 0.881399459369008 | -0.002267272 | 0.00741686684650354 | 0.763346764613799 |
| cg05831188 | SDK1 | 5 | -0.115721524 | 0.0432321764965154 | 0.00743411327643195 | 0.890723234119317 | 0.818357014474624 | 0.969488702078667 | 1.50355760521079 | 0.82601109588002 | 0.00787316214583094 | 0.0272329858471224 | 0.79132909797369 |
| cg06506470 | SDK1 | 17 | -0.067590305 | 0.0238426604105431 | 0.00458475735992596 | 0.934643313932411 | 0.891970767048528 | 0.979357347291891 | 12.2873964536446 | 0.72397032242545 | 0.00145525455233503 | 0.00933488699580442 | 0.878195083417578 |
| cg08242194 | SDK1 | 9 | -0.085145026 | 0.0347847628661777 | 0.0143744222719371 | 0.918379086237144 | 0.85785245268634 | 0.983176236655413 | 4.3345767237448 | 0.825745979072863 | -0.00306715 | 0.0196717185470328 | 0.880499794935841 |
| cg27215475 | SDK1 | 3 | -0.317885794 | 0.1554778437471 | 0.0408969784011918 | 0.727685889816363 | 0.536535597547737 | 0.986936853133437 | 3.7718595142527 | 0.151687960883293 | 0.0233343465712453 | 0.130252117393474 | 0.887148252922907 |
| cg09424595 | SDK1 | 4 | -0.13823439 | 0.0641297715429213 | 0.031119477649742 | 0.870894539045183 | 0.768028265864941 | 0.987538261088033 | 0.119436458422256 | 0.989407067647316 | -0.004292216 | 0.0267262309035976 | 0.887164340945231 |
| cg07526904 | SDK1 | 25 | 0.0355361539220019 | 0.0171242482587607 | 0.0379684682488764 | 1.03617510924496 | 1.0019745742441 | 1.0715430157784 | 29.3324019880727 | 0.207871422030419 | 0.000999466987978413 | 0.00761899242399868 | 0.896772843154394 |
| cg11998932 | SDK1 | 20 | 0.0940757937156854 | 0.0206766633484668 | 5.3683220830985e-06 | 1.09864301299774 | 1.05500924882956 | 1.14408141099032 | 21.9784469400679 | 0.28533023774168 | -0.001299257 | 0.0129719373755191 | 0.921325204766777 |
| cg05604819 | SDK1 | 7 | -0.090901188 | 0.0462742714104088 | 0.0494837001335187 | 0.91310793261755 | 0.833935881899838 | 0.999796404862259 | 2.30407206405662 | 0.889718501064395 | 6.20323107909625e-05 | 0.0193984258410783 | 0.997572191455676 |
| cg15167008 | CCDC3 | 11 | 0.0856903019559602 | 0.0326969420570327 | 0.00877382194064117 | 1.08946886967471 | 1.02183935805149 | 1.16157437921908 | 13.4624120182836 | 0.19895409299131 | -0.006484918 | 0.00794329561791508 | 0.435346127547247 |
| cg00255919 | IRF1 | 42 | 0.0392512350447774 | 0.00983826838648216 | 6.61712151099152e-05 | 1.04003174325159 | 1.02016892773229 | 1.06028129025194 | 66.036001989 | 0.00787802726423394 | -0.011776871 | 0.00695032587808463 | 0.0979562516029498 |
| cg15375424 | IRF1 | 13 | 0.0985883178935381 | 0.0226053117607683 | 1.29297915823748e-05 | 1.10361186876594 | 1.05578219243091 | 1.15360835370478 | 12.3829391540536 | 0.415435794960858 | -0.027020061 | 0.0168890234910149 | 0.137934885999966 |
| cg15421363 | IRF1 | 6 | 0.169564923719521 | 0.0418289106930453 | 5.03980459284823e-05 | 1.18478926546214 | 1.0915298657623 | 1.28601667034917 | 6.99759901548683 | 0.220818933454631 | 0.0138784235487711 | 0.0159806207977002 | 0.434147263023685 |
| cg17394978 | IRF1 | 24 | 0.0686679583564905 | 0.0162979067817835 | 2.51667277148029e-05 | 1.07108050676581 | 1.03740672043283 | 1.10584733005689 | 31.0483980986317 | 0.121608725058337 | -0.017481527 | 0.00818683903216031 | 0.0441173683488333 |
| cg21138405 | IRF1 | 37 | 0.0426739998811636 | 0.00914969891010788 | 3.10153654601361e-06 | 1.04359762643962 | 1.02504917804236 | 1.06248171233146 | 41.888826754802 | 0.230541638997999 | -0.002387256 | 0.00655933901119064 | 0.718086573450214 |
